# Supplementary material for: Is the link between socioeconomic status and resilience mediated by reserve-building activities: mediation analysis of web-based cross-sectional data from chronic medical illness patient panels
Source: PubMed Central journal article supplement — BMJ Open. 2019 Jun 1;9(5):e025602. doi: 10.1136/bmjopen-2018-025602 (PMC6549651; doi:10.1136/bmjopen-2018-025602), 2019-06-01
Supplement: bmjopen-2018-025602.draft_revisions.pdf [file bmjopen-2018-025602.draft_revisions.pdf]

# BMJ Open

BMJ Open is committed to open peer review. As part of this commitment we make the peer review history of every article we publish publicly available.

When an article is published we post the peer reviewers' comments and the authors' responses online. We also post the versions of the paper that were used during peer review. These are the versions that the peer review comments apply to.

The versions of the paper that follow are the versions that were submitted during the peer review process. They are not the versions of record or the final published versions. They should not be cited or distributed as the published version of this manuscript.

BMJ Open is an open access journal and the full, final, typeset and author-corrected version of record of the manuscript is available on our site with no access controls, subscription charges or pay-per-view fees (<http://bmjopen.bmj.com>).

If you have any questions on BMJ Open's open peer review process please email [editorial.bmjopen@bmj.com](mailto:editorial.bmjopen@bmj.com)

# BMJ Open

## Unpacking the Socioeconomic Status and Resilience Connection: Reserve-Building Activities as Mediators

|                               |                                                                                                                                                                                                                                                                                                                                                       |
|-------------------------------|-------------------------------------------------------------------------------------------------------------------------------------------------------------------------------------------------------------------------------------------------------------------------------------------------------------------------------------------------------|
| Journal:                      | <i>BMJ Open</i>                                                                                                                                                                                                                                                                                                                                       |
| Manuscript ID                 | bmjopen-2018-025602                                                                                                                                                                                                                                                                                                                                   |
| Article Type:                 | Research                                                                                                                                                                                                                                                                                                                                              |
| Date Submitted by the Author: | 26-Jul-2018                                                                                                                                                                                                                                                                                                                                           |
| Complete List of Authors:     | Schwartz, Carolyn; DeltaQuest Foundation, Inc., ; Tufts University School of Medicine, Medicine & Orthopaedic Surgery<br>Zhang, Jie; DeltaQuest Foundation, Inc.<br>Stucky, Brian; Los Alamos National Laboratory<br>Michael, Wesley; Rare Patient Voice, LLC<br>Rapkin, Bruce; Albert Einstein College of Medicine, Epidemiology & Population Health |
| Keywords:                     | cognitive reserve, socioeconomic status, social determinants of health, resilience, chronic illness                                                                                                                                                                                                                                                   |
|                               |                                                                                                                                                                                                                                                                                                                                                       |

SCHOLARONE™  
Manuscripts

Peer Review Only

## Unpacking the Socioeconomic Status and Resilience Connection:

### Reserve-Building Activities as Mediators

Carolyn E. Schwartz, Sc.D.<sup>1,2\*</sup>, Jie Zhang, M.P.H.<sup>1</sup>, Brian D. Stucky, Ph.D.<sup>3</sup>, Wesley Michael, M.B.A.<sup>4</sup>,

Bruce D. Rapkin, Ph.D.<sup>5</sup>

1 DeltaQuest Foundation, Inc., Concord, MA, USA

2 Departments of Medicine and Orthopaedic Surgery, Tufts University Medical School, Boston,  
3 MA, USA

4 Los Alamos National Laboratory, Santa Fe, NM, USA

5 Rare Patient Voice, LLC, Towson, MD, USA

6 Department of Epidemiology and Population Health, Division of Community Collaboration &  
7 Implementation Science, Albert Einstein College of Medicine, Bronx, NY, USA

#### Corresponding author:

Carolyn Schwartz, Sc.D., DeltaQuest Foundation, Inc.

31 Mitchell Road

Concord, MA 01742

Phone 978 318 7914

[carolyn.schwartz@deltaquest.org](mailto:carolyn.schwartz@deltaquest.org)

**Word Count:** 3,090

**Author Contributorship Statement:**

*Conceptualize and designed study:* CES, BDS, BDR

*Access to sample:* WM

*Data collection:* CES, JZ, WM

*Data Analysis:* CES, JZ, BDS, BDR

*Interpretation of findings:* CES, JZ, BDS, BDR

*Manuscript writing/editing:* CES, JZ, WM, BDS, BDR

## Abstract

**Objectives:** The purpose of this study is to test the hypothesis that the link between socioeconomic status (SES) and resilience is mediated by reserve-building activities.

**Design:** Cross-sectional observational study. Structural equation modeling (SEM) was used to test the mediation hypothesis.

**Setting:** Web-based survey

**Participants:** Participants with a chronic medical condition were recruited from Rare Patient Voice, LLC

**Primary and Secondary Outcome Measures:** DeltaQuest Reserve-Building Measure; demographic variables to capture SES; Centers for Disease Control Healthy Days Core Module; Self-Administered Comorbidity Questionnaire. Resilience was operationalized using residual modeling.

**Results:** The study sample included 442 patients (mean age 49, 85% female). SES was modeled as a bifactor model comprised of General SES and specific factors for Personal Finance and Parent's Education. A series of simple mediation models predicting Resilience led to the selection of three Reserve-Building activities for subsequent SEM-based mediation models: Active in the World, Outdoor, and Exercise. The full SEM model supported the hypothesis that the relationships from both General SES and Personal Finance to Resilience were mediated by engaging in the three Reserve-Building activities. In addition, number of comorbidities partially mediated the relationship between Personal Finance and Reserve-Building. Those with more comorbidities generally had lower levels of Resilience.

**Conclusions:** This study provides a mechanism by which SES promotes resilience: people of higher SES are more likely to engage in reserve-building activities that are intellectually stimulating, involve outdoor pursuits, and include physical exercise. These reserve-building activities are not costly to

1 pursue. These findings may empower patients to introduce more such reserve-building activities into  
2  
3  
4 their lives.

5  
6 **Key Words:** cognitive reserve; socioeconomic status; social determinants of health; resilience,  
7  
8 chronic illness  
9

10  
11  
12  
13  
14  
15  
16  
17  
18  
19  
20  
21  
22  
23  
24  
25  
26  
27  
28  
29  
30  
31  
32  
33  
34  
35  
36  
37  
38  
39  
40  
41  
42  
43  
44  
45  
46  
47  
48  
49  
50  
51  
52  
53  
54  
55  
56  
57  
58  
59  
60

For peer review only

## Article Summary

### Strengths and Limitations of this study

- Using a more comprehensive measure of reserve-building activities than previously used in past research, the present study of 442 people with chronic illness investigated whether reserve-building activities mediated the relationship between socioeconomic status and resilience.
- This study documents that people with higher SES tend to be more resilient in the face of chronic illness by dint of their regular practice of modifiable and not necessarily expensive activities that stimulate them intellectually, culturally, and physically.
- While the sample is heterogeneous in its illness representation, it is predominantly comprised of middle-aged white females who are married or living with family members.
- The data are also cross-sectional, limiting our ability to test causal effects.
- The present study provides a mechanism by which SES promotes resilience: people of higher SES are more likely to engage in reserve-building activities that are intellectually stimulating, involve outdoor pursuits, and include physical exercise.

## Introduction

Substantial health disparities exist in the United States, despite 18% of the gross national product expenditures being on health care (1). A large literature has documented the relationship between socioeconomic status (SES) on morbidity and mortality (2, 3), and has shown that this relationship does not simply reflect the effects of poverty (4). This SES-morbidity relationship is similar across income groups, extending beyond poverty to explain relative differences in health among higher SES groups as well (2, 4). The SES-health connection may relate to patterns of social behavior and interpersonal experiences that either promote disease or protect against it (4, 5).

Recent work on the concept of reserve and reserve-building activities may provide a useful mechanism by which (high) SES buffers health. Building on observational work in patient populations with neurological disease, a substantial body of research has documented that past and current engagement in activities that stimulate the brain may buffer against disease progression in people with multiple sclerosis, Alzheimer's disease, or other neurological conditions(6-8), and may be protective against cognitive impairment after chemotherapy in cancer patients (9). The past and current "reserve-building activities" (10, 11) may reflect not only whole-brain stimulation (e.g., education, childhood enrichment activities) but also "multiple intelligences" (i.e., skills ranging across intellectual, artistic, and physical pursuits) (12). Thus, engaging in reserve-building activities may promote better health outcomes across the health-illness spectrum (i.e., resilience) by helping the individual to stimulate the brain; and to remain flexible and with higher plasticity (10, 13-16). This flexibility may translate to more adaptive ways of coping (17), as well as to appraisal processes that emphasize the positive and focus on aspects of their life that are more controllable (18).

To date, the fields of social determinants of health and reserve have remained distinct. Their inter-connection led to the present study involving a heterogeneous cohort of people with chronic illness. We seek to test the hypothesis that the SES-resilience link is mediated by reserve-building activities.



## Methods

### Sample

Eligible participants were patients with a chronic medical condition of age 18 years or older, and able to complete an online questionnaire. Participants were recruited from Rare Patient Voice, LLC and WhatNext panels, which include people with diagnoses of a heterogeneous grouping of chronic health conditions (Rare Patient Voice) and cancer (WhatNext). The panel participants were recruited in-person at conferences and gatherings of disease-specific organizations.

### Patient and Public Involvement

The present study did not directly involve patients or the public in its design. It did, however, follow-up on a decade-long evolution. The concept of reserve-building evolved over a decade of research with chronically ill patients. The measure of reserve-building was developed over a period of seven years, involving patient feedback and input on item development, and cognitive interviews of earlier versions of the measure. Finally, the research question “Is reserve-building only available to patients with substantial financial and other socioeconomic resources?” was formulated by patients in open question-and-answer sessions directed at the first author at conference presentations. Results of this research path have been provided to study participants in the form of lay-language slide presentations supplied by the first author.

### Procedure and Design

A web-based survey was administered in Spring 2016 using the HIPAA-compliant, secure SurveyGizmo engine ([www.surveygizmo.com](http://www.surveygizmo.com)). Email invitations were sent to panel members using their standard protocol for notifying panel participants of study opportunities. We followed study procedures described by Dillman’s Tailored Design Method (19). The survey began with an informed consent form that participants endorsed prior to completing the questionnaires. The study was reviewed and approved by the New England Review Board (NEIRB#15-254), and conforms to the principles embodied in the Declaration of Helsinki.

## Measures

**Reserve-Building** was measured with subscales from the *DeltaQuest Reserve-Building Measure* (20) assessing current reserve-building activities, past reserve-building activities, and person characteristics (10). The present study included the nine Current-Reserve-Building Activities subscales: Active in the World (e.g., attending lectures; 3 items), Games (e.g., puzzles; 3 items), Outdoors (e.g., spending time outdoors; 3 items), Creative (e.g., hobbies involving working with one's hands; 4 items), Religious/Spiritual (e.g., individual or group religious; 3 items), Exercise (e.g., mild, moderate and strenuous exercise; 4 items), Inner Life (e.g., reading; 3 items), Shopping/Cooking (e.g., cooking as a hobby; 2 items), and Passive Media Consumption (e.g., watching television; 3 items). Person Factors related to reserve-building included subscales for Perseverance (5 items), Work Value (2 items), and Current Social Support (5 items)(see (20) for psychometric details).

To capture SES-related variables, we included the following variables from the DeltaQuest Reserve-Building measure's past reserve-building subscales: self and parent education, income, and occupational complexity. Occupational complexity was assessed using a series of skip-logic questions querying the job that was closest to the respondent's current or past occupation, which were then scored for complexity using the O\*NET system (21). Additionally, we included an item asking about the respondent's difficulty paying bills (22). This item was reverse-coded so that higher scores reflected *lower* difficulty paying bills.

**Resilience** was measured using a residual model approach described below in Statistical Analysis. Items from the *Centers for Disease Control (CDC) Healthy Days Core Module* (23) was used to create the Resilience score, consistent with prior work done by members of our group (24). Two items ask the respondent to indicate how many days of the past 30 days their physical (Physical Health Problems) or mental (Mental Health Problems) health, respectively, was not good. A third item (Activities of Daily Living Impaired (ADL Impaired)) asks how many days of the past 30 the

1 respondent's poor physical or mental health kept them from doing their usual activities, such as self-  
2 care, work, or recreation.  
3  
4

5  
6 Respondent **demographic characteristics** included age, gender, ethnicity, race, cohabitation/marital  
7 status, with whom the person lives, employment status, annual household income categories, and  
8 number of comorbidities, as measured by the *Self-Administered Comorbidity Questionnaire* (25).  
9  
10  
11

## 12 **Statistical Analysis**

13  
14 To operationalize Resilience, we built on a precedent for using residual modeling to study  
15 epiphenomena (26-28). We computed a regression model with the CDC Healthy Days ADL Impaired  
16 as the dependent variable, and Physical Health Problems, Mental Health Problems, and their  
17 interaction as predictors. The residuals from the regression model were saved and multiplied by  
18 negative one (-1). Thus, a high Resilience score reflects fewer-than-expected days that the  
19 respondent is unable to function due to physical or mental health problems or the synergistic effect of  
20 physical and mental health problems (24).  
21  
22  
23  
24  
25  
26  
27  
28  
29  
30

31  
32 General SES was operationalized using a bifactor methodology (e.g., (29, 30)). In a bifactor model,  
33 factor loadings on the single *general* factor reflect the magnitude of relationships between the  
34 variables (e.g., self and parent education, income, and occupational complexity) and general SES. In  
35 the bifactor context, shared content between subsets of variables is captured by a second loading on  
36 a *content-specific* factor. For example, the residual correlation between mother's and father's  
37 education may be captured by the specific factor Parent's Education. Similarly, the residual  
38 correlation between income and difficulty paying bills is captured by the specific factor Personal  
39 Finance. In this manner, the bifactor model accounts for dependencies between items when  
40 establishing a total SES score.  
41  
42  
43  
44  
45  
46  
47  
48  
49  
50  
51

52  
53 Mediation models were conducted within a structural equation modeling (SEM) framework. It was  
54 hypothesized that Reserve-Building activities would mediate the relationship between SES and  
55  
56  
57  
58  
59  
60

1 Resilience. In mediation analyses there are two types of relationships (*pathways*) to consider. There  
2  
3 is the *direct effect* from SES to Resilience, and there is the *indirect effect* from SES to Resilience  
4  
5 through both variables' relationship with Reserve-Building (the *mediator*; See Figure 1). In this  
6  
7 instance, mediation occurs when some (partial) or all (full) of the direct effect between SES and  
8  
9 Resilience is accounted for by the indirect effect through Reserve-Building.  
10  
11

12  
13 [FIGURE 1 NEAR HERE]  
14  
15

16 SEM mediation analyses were conducted using Mplus version 7 software. Model fit was evaluated  
17  
18 using the following indices: RMSEA $\leq$ .08, TLI $\geq$ .95, and CFI $\geq$ .95;(31, 32). Analyses of observed  
19  
20 variables were conducted using Stata 15 (33) and SPSS 24 (34). Pearson correlations were  
21  
22 evaluated using Cohen's criteria for delineating small ( $0.10 < r < 0.30$ ), medium ( $0.30 < r < 0.50$ ), and  
23  
24 large ( $r > 0.50$ ) effect sizes, hereafter referred to as small, medium and large correlations (35). We  
25  
26 examined distributions of all variables to be included in the analysis.  
27  
28  
29  
30  
31

## 32 Results

### 33 Sample

34 The study sample included 442 patients. Table 1 provides the sociodemographic characteristics, ICD-  
35  
36 10 categories, and reported comorbidities of this heterogeneous sample. The sample had a mean  
37  
38 age of 49, and 85% were female. Most respondents were married and living with spouse and/or  
39  
40 family members. The most prevalent ICD-10 index health conditions (i.e., for panel membership)  
41  
42 were diseases of the nervous system followed by neoplasms, and endocrine diseases. The most  
43  
44 prevalent co-morbidities were back pain, depression, and insomnia. Sixty-nine percent of the sample  
45  
46 reported a family income of less than \$100,000 annually, and 69% of the sample reported that it was  
47  
48 somewhat, very, or extremely difficult to pay their bills. The majority of the sample reported past or  
49  
50 current occupations reflecting little to medium preparation needed.  
51  
52  
53  
54  
55

56 [TABLE 1 NEAR HERE]  
57  
58  
59  
60

1  
2  
3  
4 Table 2 shows descriptive statistics of the reserve-building, person factors and demographic scores  
5 used to create the SES latent variable scores. Mother's education level was positively skewed,  
6  
7 suggesting that most participants reported relatively low levels of maternal education. Two of the  
8  
9 current Reserve-Building subscales were negatively skewed (Passive Media Consumption, Inner  
10  
11 Life), suggested that most people spent substantial amounts of time in both of these types of  
12  
13 activities. The other variables tested in the SEM model were normally distributed.  
14  
15  
16  
17

18 [TABLE 2 NEAR HERE]  
19  
20

21 Table 3 shows Pearson correlation coefficients among the variables considered in the current study.  
22  
23 It revealed that the socioeconomic indices generally had small correlations, although mother's and  
24  
25 father's education had moderate correlations, and difficulty paying bills had a moderate correlation  
26  
27 with number of comorbidities. The Reserve-Building subscales generally had small or negligible  
28  
29 correlations with socioeconomic indices, and small to moderate inter-correlations. The Reserve-  
30  
31 Building measures generally had small or negligible correlations with the resilience score. Four  
32  
33 Reserve-Building scores had small correlations with Resilience: Active in the World, Outdoors,  
34  
35 Exercise, and Shopping/Cooking. The resilience score was most driven by (fewer) number of days  
36  
37 with physical health problems. Resilience had a moderate negative correlation with number of  
38  
39 comorbidities and difficulty paying bills, and small positive correlations with respondent's education  
40  
41 and income tertile. Resilience was not correlated with mother's education, father's education, or job  
42  
43 complexity. The correlation matrix providing a starting point for parsimonious SEM model building,  
44  
45 suggesting that the socioeconomic indicators be modeled as a latent variable(s), and considering only  
46  
47 four of the nine Reserve-Building scores in the model: Active in the World, Outdoor, Exercise, and  
48  
49 Shopping/Cooking.  
50  
51  
52  
53  
54

55 [TABLE 3 NEAR HERE]  
56  
57  
58  
59  
60

### Step 1: Bifactor model of SES

We first modeled SES as a bifactor model with the general factor comprised of respondent's education, father's education, mother's education, occupational complexity, income tertile, and endorsed difficulty paying bills (Supplementary Figure 1). The specific (i.e., orthogonal) factors in the bifactor model account for residual covariance between Parent's Education (mother's and father's education) and Personal Finance (income and difficulty paying bills). Note that the magnitude of the general factor loadings is small for those items that also have factor loadings on Parent's Education and Personal Finance. This pattern is due to the strength of the covariance between these item subsets, and is reflected in the relatively high loadings on the specific factors. The bifactor SES model closely fit the data ( $\chi^2=9.3$ ,  $df=7$ ,  $p=.23$ ;  $RMSEA=.027$ ,  $CFI=0.996$ ,  $TLI=0.992$ ) and provided a starting point for subsequent mediation models.

### Step 2: Simple mediation models for Reserve-Building activities

We next evaluated a series of simple mediation models where each of the nine Reserve-Building activities mediated the relationship between the general SES factor and Resilience (Supplementary Table 1). The results of these models led to the selection of three Reserve-Building activities for subsequent SEM-based mediation models: Active in the World, Outdoor, and Exercise were significant mediators of the relationship between SES and Resilience. Of note, exercise was the strongest direct predictor for Resilience.

### Step 3: Full mediation models tested

We then developed a mediation model where the relationship between SES (step 1) and Resilience was mediated by the three Reserve-Building activities identified in step 2. An addition, the number of comorbidities was modeled as a covariate of Resilience. The penultimate model accounted for 19% of variance in Resilience but poorly fit the data ( $\chi^2=229.1$ ,  $df=36$ ,  $p<.01$ ;  $RMSEA=.110$ ,  $CFI=0.796$ ,  $TLI=0.689$ ; See Supplementary Table 2).

1 Review of modification indices and the correlation matrix in Table 3 suggested that the penultimate  
2 mediation model was not accounting for relationships between Personal Finance, as defined in the  
3 bifactor model, and Resilience. After adding the Personal Finance latent variable as a predictor of  
4 Resilience, the final mediation model accounted for 25% of the variance in Resilience and closely fit  
5 the data ( $\chi^2=47.4$ ,  $df=31$ ,  $p=.03$ ;  $RMSEA=.035$ ,  $CFI=0.983$ ,  $TLI=0.970$ ; See Table 4).  
6  
7  
8  
9  
10  
11

12 [TABLE 4 NEAR HERE]  
13  
14  
15

16 As illustrated in Figure 2, the relationship between Resilience and both SES and Personal Finance is  
17 mediated by three Reserve-Building activities (Active in the World, Outdoor, and Exercise). In other  
18 words, the bivariate relationships (SES to Resilience) were significant until Reserve-Building activities  
19 were included in the model, and then the significant relationships were *only* from SES to Reserve-  
20 Building, but not the paths from Reserve-Building to Resilience. Further, the three specific Reserve-  
21 Building to Resilience paths have p-values are .00, .12, and .17, two of which are *nearly* significant or  
22 highly significant. The total mediation effect considers them as a whole collection, and taken together  
23 they do account for enough of the variance to create a total mediation effect.  
24  
25  
26  
27  
28  
29  
30  
31  
32  
33  
34

35 In addition, the Personal Finance to Resilience path is also mediated by the participant's number of  
36 comorbid conditions. As indicated in Table 4, there are significant total indirect effects from both  
37 General SES ( $b = 0.06$ ,  $p < 0.01$ ) and Personal Finance ( $b = 0.13$ ,  $p < 0.01$ ) to Resilience. This model  
38 supports the hypothesis that the relationship between General SES and Resilience is fully mediated  
39 by engaging in the three Reserve-Building activities. However, there is only partial mediation from  
40 Personal Finance to Resilience because of the remaining significant direct effect ( $b = 0.31$ ,  $p < 0.01$ ).  
41 Higher levels of Personal Finance were also negatively associated with number of comorbidities, and  
42 those with more comorbidities generally had lower levels of Resilience.  
43  
44  
45  
46  
47  
48  
49  
50  
51  
52  
53

54 [FIGURE 2 NEAR HERE]  
55  
56  
57  
58  
59  
60

## Discussion

Our findings suggest that the SES-Resilience link is mediated by the individual's engagement in Reserve-Building activities. Thus, people with higher SES tend to be more resilient in the face of chronic illness by dint of their regular practice of activities that stimulate them intellectually, culturally, and physically. In other words, people with higher SES are more likely to spend their discretionary time engaging in reserve-building activities, and this practice makes them more resilient despite their chronic illness. This finding suggests that resilience is not determined by SES, but is modifiable if individuals can augment their practice of three types of reserve-building activities, such as attending lectures or concerts, participating in outdoor activities, and engaging in physical exercise. Choosing to engage in these three types of activities rather than other more passive, less stimulating activities appears to have a beneficial association with health.

A second finding of the present study is that Personal Finance had a direct effect on resilience: individuals with higher income and/or lower difficulty paying bills had higher resilience scores. Personal Finance also played a role in the relationship between number of comorbidities and resilience: people with more financial resources tended to have fewer comorbidities, these financial resources had a smaller protective effect in the context of multiple comorbidities. This finding may reflect the fact that people with fewer financial resources are less likely to treat their comorbidities (36). Untreated comorbidities would likely reduce one's ability to be resilient to health challenges.

There has been an increasing interest in improving healthcare outcomes. In this context, 'social determinants of health' are more often than not cast in terms of deficits or negative situations that people encounter (37, 38). What is missing is addressing positive social determinants of health (39, 40), or person factors that confer resilience, such as reserve-building activities. Our findings suggest that it would be worthwhile to recommend the three types of activities associated with enhanced resilience. Although exercise is standardly recommended to reduce mortality, our findings suggest that it is also beneficial for conferring day-to-day resilience in the face of physical or mental health



1 problems. Further, other types of activities may confer similar benefits. Thus, there may be more  
2  
3 options that healthcare providers can offer to people that can help them achieve better resilience and  
4  
5 that might fit their lifestyle more easily, if exercise is not a viable option.  
6  
7

8 The present study has a notable strength in its large and heterogeneous sample, which is useful for  
9  
10 testing a complex hypothesis via SEM techniques. It included both income and difficulty paying bills in  
11  
12 the operationalization of General SES and Personal Finance, thus capturing complementary and  
13  
14 distinct aspects of financial well-being that are often not considered in tandem. The sample had  
15  
16 important variability in comorbidity burden, which allowed for evaluating the independent relationship  
17  
18 between comorbidity and resilience. The limitations of this study should, however, be noted. While the  
19  
20 sample is heterogeneous in its illness representation, it is predominantly comprised of middle-aged  
21  
22 white females who are married or living with family members. Thus, additional work is needed to  
23  
24 establish relationships with resilience across age and gender. Indeed, these variables were not  
25  
26 strongly related as shown in bivariate correlations and thus were not kept in our SEM models. The  
27  
28 data are also cross-sectional, limiting our ability to test causal effects. Replication of our findings in  
29  
30 longitudinal data is needed. Future research might address how to increase the perceived availability  
31  
32 and opportunities for engaging in reserve-building activities among people with fewer SES resources.  
33  
34 For example, motivational interviewing techniques might be useful for addressing perceived barriers  
35  
36 to different types of reserve-building activities (e.g., cultural activities, exercise, etc.), and helping  
37  
38 patients to find inexpensive ways to get such activities into their lives.  
39  
40  
41  
42  
43  
44

45 In summary, the present study provides a mechanism by which SES promotes resilience: people of  
46  
47 higher SES are more likely to engage in reserve-building activities that are intellectually stimulating,  
48  
49 involve outdoor pursuits, and include physical exercise. The implications of these findings may be  
50  
51 useful for empowering patients to introduce more such reserve-building activities in their lives, and to  
52  
53 replace more passive activities (e.g., television) with these active, salutogenic pursuits.  
54  
55  
56  
57  
58  
59

1 Fundamentally, the reserve-building activities implicated in the present study are not costly to pursue  
2  
3 (“the best things in life are free”). This critical accessibility and affordability has applications for public-  
4  
5 health interventions to enhance resilience in healthy and chronically ill individuals.  
6  
7

## 8 **Acknowledgements**

9 We are grateful to the patients who participated in this study.  
10  
11

## 12 **Funding details**

13 This work was unfunded by any external agency.  
14  
15

## 16 **Disclosures**

17 All authors declare that they have no potential conflicts of interest and report no disclosures.  
18  
19

## 20 **Data sharing statement**

21 No additional data available.  
22  
23

## 24 **Data deposition**

25 Not applicable.  
26  
27  
28

## 29 **References**

- 30 1. Hartman M, Martin AB, Espinosa N, Catlin A, Team NHEA. National Health Care Spending In  
31 2016: Spending And Enrollment Growth Slow After Initial Coverage Expansions. Health Affairs. 2017.  
32  
33
- 34 2. Adler NE. Health disparities through a psychological lens. American Psychologist.  
35 2009;64(8):663.  
36  
37
- 38 3. Chetty R, Stepner M, Abraham S, Lin S, Scuderi B, Turner N, et al. The association between  
39 income and life expectancy in the United States, 2001-2014. Jama. 2016;315(16):1750-66.  
40  
41
- 42 4. Cundiff JM, Matthews KA. Is subjective social status a unique correlate of physical health? A  
43 meta-analysis. Health Psychology. 2017;36(12):1109.  
44  
45
- 46 5. Cundiff JM, Smith TW. Social status, everyday interpersonal processes, and coronary heart  
47 disease: A social psychophysiological view. Social and Personality Psychology Compass. 2017;11(4).  
48  
49  
50  
51  
52  
53  
54  
55  
56  
57  
58  
59

- 1 6. Schwartz CE, Quaranto BR, Healy BC, Benedict RH, Vollmer TL. Cognitive reserve and  
2 symptom experience in multiple sclerosis: a buffer to disability progression over time? Archives of  
3 physical medicine and rehabilitation. 2013;94(10):1971-81.
- 4  
5  
6  
7  
8 7. Stern Y, Gurland B, Tatemichi TK, Tang MX, Wilder D, Mayeux R. Influence of education and  
9 occupation on the incidence of Alzheimer's disease. Journal of the American Medical Association.  
10 1994;271(13):1004-10.
- 11  
12  
13  
14  
15 8. Pernecky R, Drzezga A, Boecker H, Ceballos-Baumann AO, Granert O, Förstl H, et al.  
16 Activities of daily living, cerebral glucose metabolism, and cognitive reserve in Lewy body and  
17 Parkinson's disease. Dementia and Geriatric Cognitive Disorders. 2008;26(5):475-81.
- 18  
19  
20  
21  
22 9. Ahles TA, Saykin AJ, McDonald BC, Li Y, Furstenberg CT, Hanscom BS, et al. Longitudinal  
23 assessment of cognitive changes associated with adjuvant treatment for breast cancer: Impact of age  
24 and cognitive reserve Journal of Clinical Oncology. 2010;28(29):4434-40.
- 25  
26  
27  
28  
29 10. Schwartz CE, Rapkin BD, Healy BC. Reserve and Reserve-Building Activities Research: Key  
30 challenges and future directions. BMC Neuroscience. 2016;17:62.
- 31  
32  
33  
34 11. Schwartz CE, Snook EM, Quaranto BR, Benedict RH, Vollmer T. Cognitive reserve and  
35 patient-reported outcomes. Multiple Sclerosis Journal. 2013;19(1):87-105.
- 36  
37  
38  
39 12. Gardner H. Multiple intelligences: New horizons: Basic books; 2006.
- 40  
41 13. Aguiar AS, Jr., Castro AA, Moreira EL, Glaser V, Santos AR, Tasca CI, et al. Short bouts of  
42 mild-intensity physical exercise improve spatial learning and memory in aging rats: involvement of  
43 hippocampal plasticity via AKT, CREB and BDNF signaling. Mech Ageing Dev. 2011;132(11-12):560-  
44 569.
- 45  
46  
47  
48  
49 14. Barulli D, Stern Y. Efficiency capacity, compensation, maintenance, plasticity: emerging  
50 concepts in cognitive reserve. Trends in Cognitive Sciences. 2013;17(10):502-9.
- 51  
52  
53  
54 15. Cotman CW, Berchtold NC. Exercise: a behavioral intervention to enhance brain health and  
55 plasticity. Trends Neurosci. 2002;25(6):295-301.
- 56  
57  
58  
59  
60

16. Lovden M, Wenger E, Martensson J, Lindenberger U, Backman L. Structural brain plasticity in adult learning and development. *Neuroscience & Biobehavioral Reviews*. 2013;37(9, Part B):2296-310.
17. Schwartz CE, Peng CK, Lester N, Daltroy LH, Goldberger AL. Self-reported coping behavior in health and disease: assessment with a card sort game. *Behav Med*. 1998;24(1):41-4.
18. Schwartz CE, Snook E, Quaranto B, Benedict RH, Rapkin BD, Vollmer T. Cognitive reserve and appraisal in multiple sclerosis. *Multiple Sclerosis and Related Disorders*. 2013;2(1):36-44.
19. Dillman DA, Smyth JD, Christian LM. Internet, phone, mail, and mixed-mode surveys: The Tailored Design Method. Fourth ed. Hoboken, NJ: John Wiley & Sons, Inc.; 2014.
20. Schwartz CE, Michael W, Zhang J, Rapkin BD, Sprangers MAG. Assessing reserve-building pursuits and person characteristics: Psychometric validation of the DeltaQuest Reserve-Building Measure. *Quality of Life Research*. 2018;27:423-36.
21. Tsacoumis S, Willison S. O\*NET Analyst Occupational Skill Ratings: Procedures. In: Organization HRR, editor. Raleigh, NC: National Center for O\*NET Development; 2010.
22. Hanmer J, Cherepanov D. A single question about a respondent's perceived financial ability to pay monthly bills explains more variance in health utility scores than absolute income and assets questions. *Quality of Life Research*. 2016;25(9):2233-7.
23. Measuring healthy days: Population assessment of health-related quality of life. Atlanta, GA: Centers for Disease Control and Prevention; 2000.
24. Schwartz CE, Michael W, Rapkin BD. Resilience to health challenges is related to different ways of thinking: mediators of physical and emotional quality of life in a heterogeneous rare-disease cohort. *Quality of Life Research*. 2017;26(11):3075-88.
25. Sangha O, Stucki G, Liang MH, Fossel AH, Katz JN. The self-administered comorbidity questionnaire: A new method to assess comorbidity for clinical and health services research. *Arthritis Care & Research*. 2003;49(2):156-63.

26. Reed BR, Mungas D, Farias ST, Harvey D, Beckett L, Widaman K, et al. Measuring cognitive reserve based on the decomposition of episodic memory variance. *Brain : a journal of neurology*. 2010;133(Pt 8):2196-209.
27. Rapkin BD, Schwartz CE. Toward a theoretical model of quality-of-life appraisal: Implications of findings from studies of response shift. *Health and Quality of Life Outcomes*. 2004;2(1):14.
28. Bochner B, Schwartz CE, Garcia I, Goldstein L, Zhang J, Rapkin BD. Understanding the impact of radical cystectomy and urinary diversion in patients with bladder cancer: treatment outcomes clarified by appraisal process. *Quality of Life Research*. 2017;26(Suppl 1):6.
29. Holzinger KJ, Swineford F. The bi-factor method. *Psychometrika*. 1937;2:41-54.
30. Gibbons RD, Hedeker DR. Full-information item bifactor analysis. *Psychometrika*. 1992;57:423-36.
31. Hu LT, Bentler PM. Cutoff criteria for fit indexes in covariance structure analysis: Conventional criteria versus new alternatives. *Structural Equation Modeling-a Multidisciplinary Journal*. 1999;6(1):1-55.
32. Browne MW, Cudeck R. Alternative ways of assessing model fit. In: Bollen KA, Long JS, editors. *Testing structural equation models*. 154. Newbury Park, CA: Sage Publications; 1993.
33. StataCorp. *Stata Statistical Software: Release 15*. College Station, TX: StataCorp LLC; 2017.
34. IBM SPSS Statistics for Windows. 24.0 ed. Armonk, NY: IBM Corp.; 2016.
35. Cohen J. A power primer. *Psychological Bulletin*. 1992;112:155-9.
36. Eton DT, Zhang J, Rapkin BD, Michael W, Schwartz CE, editors. What role do person factors play in modifying the impact of treatment burden in chronic illness? *Quality of Life Research*; 2017.
37. Capturing Social and Behavioral Domains and Measures in Electronic Health Records  
[Available from: <http://www.nap.edu/catalog/18709/capturing-social-and-behavioral-domains-in-electronic-health-records-phase>.

- 1 38. Gitterman BA, Flanagan PJ, Cotton WH, Dilley KJ, Duffee JH, Green AE, et al. Poverty and  
2 child health in the United States. *Pediatrics*. 2016:peds. 2016-0339.  
3  
4  
5  
6 39. Garg A, Boynton-Jarrett R, Dworkin PH. Avoiding the unintended consequences of screening  
7  
8 for social determinants of health. *Jama*. 2016;316(8):813-4.  
9  
10  
11 40. Adler NE, Cutler DM, Jonathan J, Galea S, Glymour M, Koh H, et al. Addressing Social  
12  
13 Determinants of Health and Health Disparities. Discussion Paper, Vital Directions for Health and  
14  
15 Health Care Series. National Academy of Medicine, Washington, DC. [https://nam.edu/wp-](https://nam.edu/wp-content/uploads/2016/09/addressing-social-determinantsof-health-and-health-disparities.pdf)  
16  
17  
18  
19  
20  
21  
22  
23  
24  
25  
26  
27  
28  
29  
30  
31  
32  
33  
34  
35  
36  
37  
38  
39  
40  
41  
42  
43  
44  
45  
46  
47  
48  
49  
50  
51  
52  
53  
54  
55  
56  
57  
58  
59  
60

## Figure Legends

**Figure 1. Theoretical Model Being Tested.** It was hypothesized that Reserve-Building activities would mediate the relationship between SES and Resilience. Thus, the direct effect from SES to Resilience would be partially or fully attenuated through both variables' relationship with Reserve-Building (the mediator).

**Figure 2. The Full Mediation Model.** Reserve-building activities mediate the relationships between Resilience and both SES and Personal Finance. The relevant Reserve-Building activities are Active in the World, Outdoor, and Exercise. The Personal Finance to Resilience path is also mediated by the participant's number of comorbid conditions. As indicated in Table 4, there are significant total indirect effects from both General SES ( $b = 0.06, p < 0.01$ ) and Personal Finance ( $b = 0.13, p < 0.01$ ) to Resilience. This model supports the hypothesis that the relationship between General SES and Resilience is mediated by engaging in the three Reserve-Building activities. Bold values indicate significant paths ( $p < .05$ ).

Figure 1. Theoretical model being tested

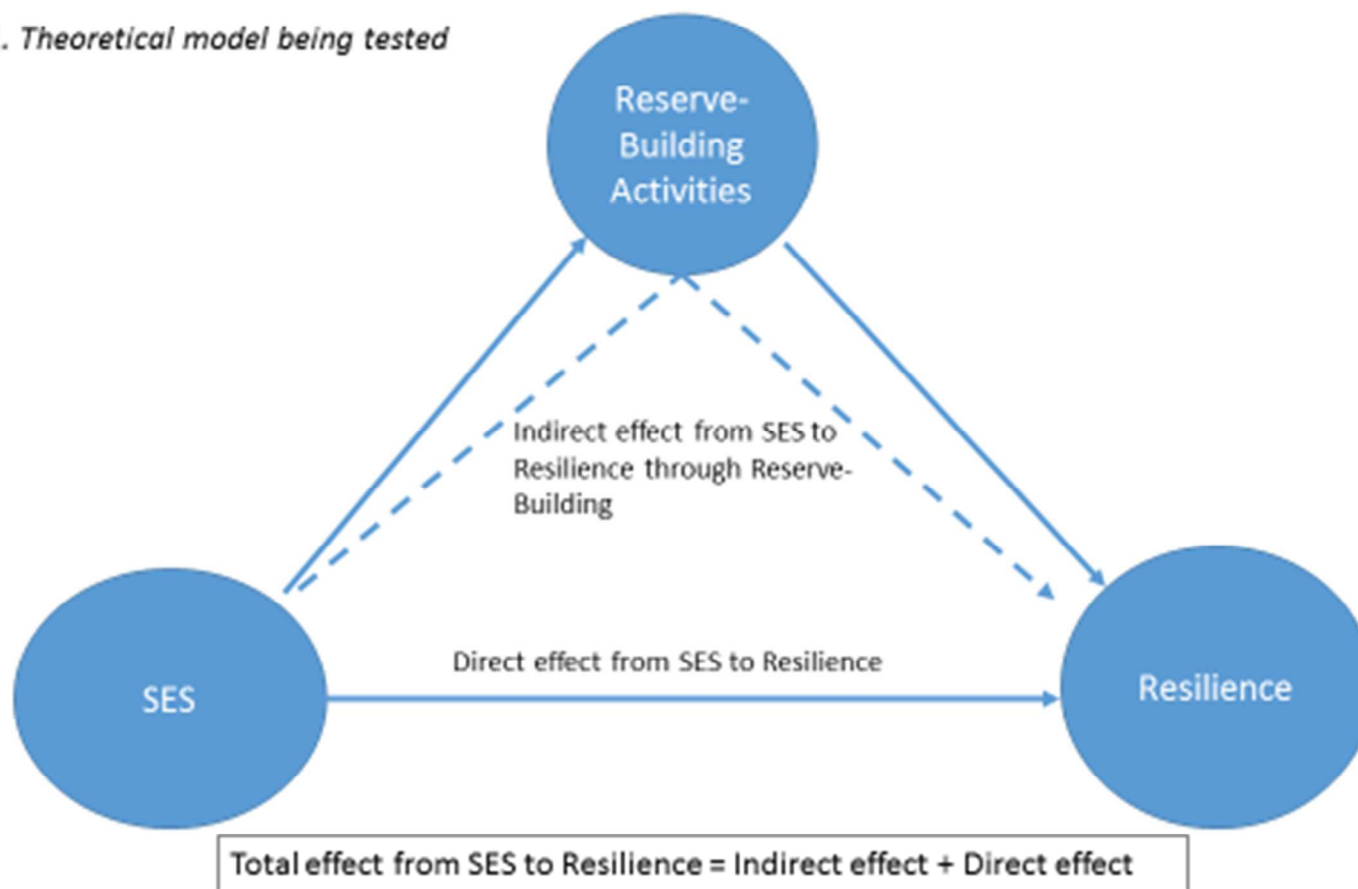



Figure 2. The Full Mediation Model.

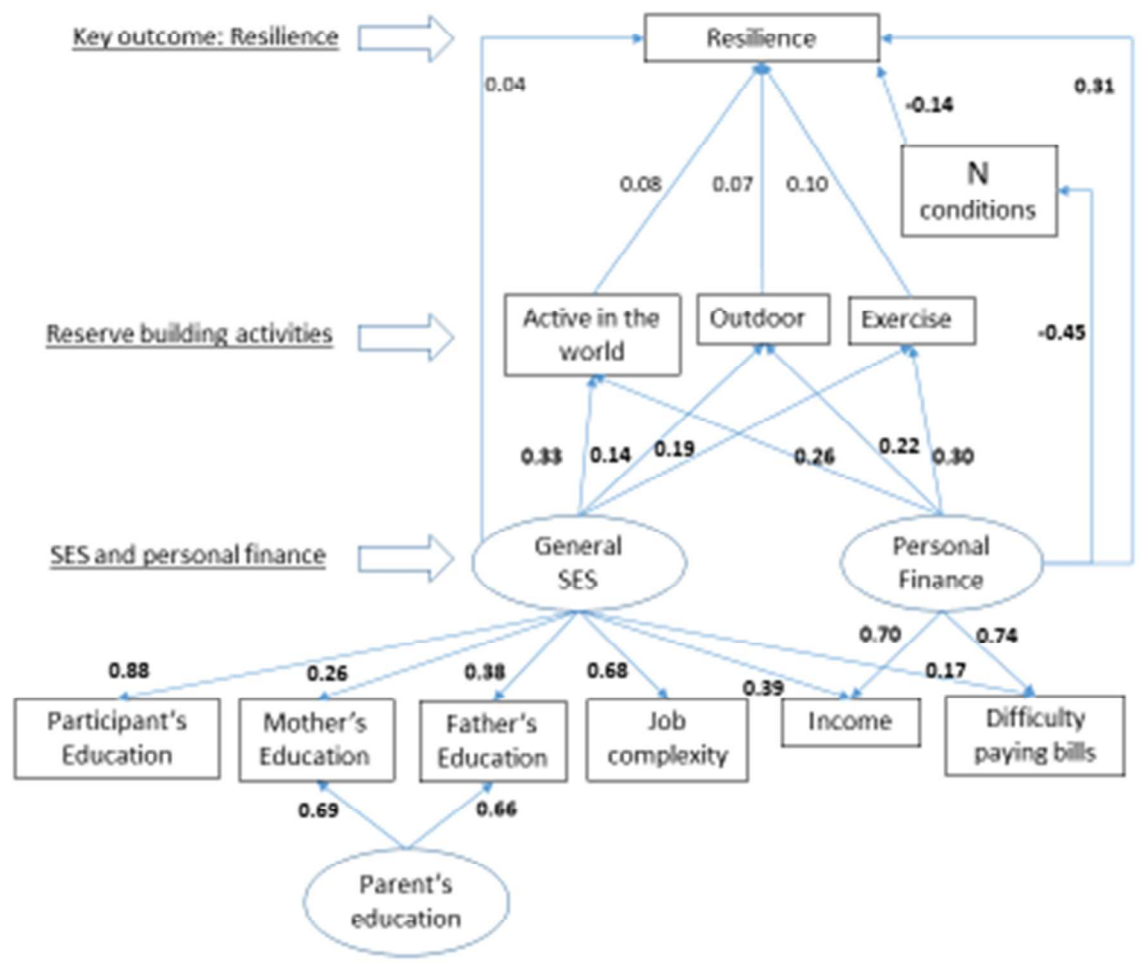

| <b>Variable</b>                                      |                                                                               |              |
|------------------------------------------------------|-------------------------------------------------------------------------------|--------------|
| <b>n</b>                                             |                                                                               | 442          |
| <b>Age</b>                                           | Mean (sd)                                                                     | 48.97(12.96) |
| <b>Gender (%)</b>                                    | Male                                                                          | 15%          |
|                                                      | Female                                                                        | 85%          |
| <b>ICD-10 Diagnostic Category of Index Condition</b> | Certain infectious and parasitic diseases                                     | 1%           |
|                                                      | Neoplasms                                                                     | 25%          |
|                                                      | Diseases of the blood and blood-forming organs and immune mechanism disorders | 5%           |
|                                                      | Endocrine, nutritional and metabolic diseases                                 | 6%           |
|                                                      | Mental and behavioural disorders                                              | 3%           |
|                                                      | Diseases of the nervous system                                                | 42%          |
|                                                      | Diseases of the ear and mastoid process                                       | 0%           |
|                                                      | Diseases of the circulatory system                                            | 3%           |
|                                                      | Diseases of the respiratory system                                            | 3%           |
|                                                      | Diseases of the digestive system                                              | 1%           |
|                                                      | Diseases of the skin and subcutaneous tissue                                  | 1%           |
|                                                      | Diseases of the musculoskeletal system and connective tissue                  | 6%           |
|                                                      | Diseases of the genitourinary system                                          | 0%           |
|                                                      | Congenital malformations, deformations and chromosomal abnormalities          | 1%           |
| <b>Comorbidities (%)</b>                             | Arthritis                                                                     | 38%          |
|                                                      | Asthma                                                                        | 19%          |
|                                                      | Back Pain                                                                     | 58%          |
|                                                      | Cancer (now or in the past)                                                   | 31%          |
|                                                      | Depression                                                                    | 52%          |
|                                                      | Diabetes                                                                      | 10%          |
|                                                      | Heart Disease                                                                 | 10%          |
|                                                      | High Blood Pressure                                                           | 31%          |
|                                                      | Insomnia                                                                      | 43%          |
|                                                      | Kidney Disease                                                                | 5%           |
|                                                      | Liver Disease                                                                 | 3%           |
|                                                      | Lung Disease                                                                  | 11%          |
|                                                      | Stroke                                                                        | 2%           |
| Ulcer or stomach disease                             | 13%                                                                           |              |
| <b>Education(%)</b>                                  | High school or less                                                           | 14%          |
|                                                      | Some college                                                                  | 38%          |
|                                                      | College degree                                                                | 27%          |
|                                                      | Graduate degree                                                               | 20%          |
|                                                      | Missing                                                                       | 0%           |
| <b>Father's Education</b>                            | High school or less                                                           | 48%          |
|                                                      | Some college                                                                  | 22%          |
|                                                      | College degree                                                                | 14%          |
|                                                      | Graduate degree                                                               | 11%          |

|                                                                                                |                                            |     |
|------------------------------------------------------------------------------------------------|--------------------------------------------|-----|
|                                                                                                | Missing                                    | 5%  |
| <b>Mother's Education</b>                                                                      | High school or less                        | 49% |
|                                                                                                | Some college                               | 30% |
|                                                                                                | College degree                             | 11% |
|                                                                                                | Graduate degree                            | 8%  |
|                                                                                                | Missing                                    | 2%  |
| <b>Marital Status (%)</b>                                                                      | Never Married                              | 15% |
|                                                                                                | Married                                    | 60% |
|                                                                                                | Cohabitation/ Domestic Partnership         | 7%  |
|                                                                                                | Separated                                  | 2%  |
|                                                                                                | Divorced                                   | 13% |
|                                                                                                | Widowed                                    | 2%  |
|                                                                                                | Missing                                    | 1%  |
| <b>Living Situation* (%)</b>                                                                   | Spouse/ Partner                            | 69% |
|                                                                                                | Other Relative (children, sibling, parent) | 44% |
|                                                                                                | Friend/ Companion                          | 4%  |
|                                                                                                | Pet(s)                                     | 48% |
|                                                                                                | Alone                                      | 11% |
|                                                                                                | Other                                      | 1%  |
| <b>Income (%)</b>                                                                              | Less than \$15,000                         | 11% |
|                                                                                                | \$15,001 to \$30,000                       | 14% |
|                                                                                                | \$30,001 to \$50,000                       | 17% |
|                                                                                                | \$50,001 to \$100,000                      | 27% |
|                                                                                                | \$100,001 to \$150,000                     | 13% |
|                                                                                                | \$150,001 to 200,000                       | 4%  |
|                                                                                                | Over \$200,000                             | 2%  |
|                                                                                                | Missing                                    | 12% |
| <b>Difficulty paying bills</b>                                                                 | Extremely difficult                        | 28% |
|                                                                                                | Very difficult                             | 16% |
|                                                                                                | Somewhat difficult                         | 24% |
|                                                                                                | Slightly difficult                         | 12% |
|                                                                                                | Not difficult at all                       | 16% |
|                                                                                                | Missing                                    | 3%  |
| <b>Occupational Complexity (ONET Job Zone)</b>                                                 | 1: Little or No Preparation Needed         | 5%  |
|                                                                                                | 2: Some Preparation Needed                 | 23% |
|                                                                                                | 3: Medium Preparation Needed               | 24% |
|                                                                                                | 4: Considerable Preparation Needed         | 22% |
|                                                                                                | 5: Extensive Preparation Needed            | 7%  |
|                                                                                                | Missing                                    | 19% |
| <i>*May add up to more than 100% because respondents were allowed to check all that apply.</i> |                                            |     |

| <b>Table 2. Descriptive Statistics of Variables Used In SEM Analysis</b> |            |               |                            |                 |
|--------------------------------------------------------------------------|------------|---------------|----------------------------|-----------------|
|                                                                          | <b>Obs</b> | <b>Median</b> | <b>Variable Label</b>      | <b>Skewness</b> |
| <b>General SES</b>                                                       |            |               |                            |                 |
| Participant's Education                                                  | 440        | 2             | High School Diploma or GED | 0.11            |
| Mother's Education                                                       | 431        | 1             | Some High School or Less   | <b>1.05</b>     |
| Father's Education                                                       | 418        | 1             | Some High School or Less   | 0.85            |
| Job Complexity                                                           | 358        | 3             | Medium Preparation Needed  | 0.03            |
| <b>Personal Finance</b>                                                  |            |               |                            |                 |
| Income                                                                   | 387        | 4             | \$50,001 to \$100,000      | 0.12            |
| Difficulty Paying Bills                                                  | 428        | 3             | Somewhat difficult         | 0.27            |
|                                                                          | <b>Obs</b> | <b>Mean</b>   | <b>Std. Dev.</b>           | <b>Skewness</b> |
| <b>Current Reserve-Building Subscales</b>                                |            |               |                            |                 |
| Active in the World                                                      | 439        | 49.91         | 7.65                       | 0.65            |
| Games                                                                    | 332        | 49.60         | 6.90                       | -0.10           |
| Outdoor                                                                  | 438        | 49.40         | 7.63                       | 0.35            |
| Creative                                                                 | 440        | 50.03         | 7.03                       | 0.47            |
| Religious / Spiritual                                                    | 437        | 49.97         | 7.68                       | 0.45            |
| Exercise                                                                 | 435        | 49.42         | 7.29                       | 0.60            |
| Passive Media Consumption                                                | 434        | 50.27         | 6.75                       | <b>-1.25</b>    |
| Shopping / Cooking                                                       | 438        | 49.86         | 8.01                       | 0.36            |
| Inner life                                                               | 334        | 50.39         | 6.71                       | <b>-1.17</b>    |
| <b>Resilience</b>                                                        | 442        | -0.11         | 1.02                       | -0.19           |
| <b>Covariate</b>                                                         |            |               |                            |                 |
| Number of Comorbidities                                                  | 442        | 5.43          | 3.68                       | 0.81            |

1  
2  
3  
4  
5  
6  
7  
8  
9  
10  
11  
12  
13  
14  
15  
16  
17  
18  
19  
20  
21  
22  
23  
24  
25  
26  
27  
28  
29  
30  
31  
32  
33  
34  
35  
36  
37  
38  
39  
40  
41  
42  
43  
44  
45  
46  
47

**Table 3. Correlation Matrix of Variables Included in SEM Modeling**

|                                                              | 1     | 2     | 3     | 4     | 5     | 6     | 7     | 8     | 9     | 10    | 11    | 12    | 13    | 14    | 15    | 16    | 17    | 18    | 19    | 20   | 21   |
|--------------------------------------------------------------|-------|-------|-------|-------|-------|-------|-------|-------|-------|-------|-------|-------|-------|-------|-------|-------|-------|-------|-------|------|------|
| 1 Age                                                        |       |       |       |       |       |       |       |       |       |       |       |       |       |       |       |       |       |       |       |      |      |
| 2 Gender                                                     | 0.04  |       |       |       |       |       |       |       |       |       |       |       |       |       |       |       |       |       |       |      |      |
| 3 No. conditions                                             | 0.20  | -0.09 |       |       |       |       |       |       |       |       |       |       |       |       |       |       |       |       |       |      |      |
| 4 Respondent's Education                                     | 0.13  | 0.03  | -0.12 |       |       |       |       |       |       |       |       |       |       |       |       |       |       |       |       |      |      |
| 5 Mother's Education                                         | -0.15 | 0.06  | -0.05 | 0.19  |       |       |       |       |       |       |       |       |       |       |       |       |       |       |       |      |      |
| 6 Father's Education                                         | -0.09 | 0.02  | -0.05 | 0.26  | 0.46  |       |       |       |       |       |       |       |       |       |       |       |       |       |       |      |      |
| 7 O*NET Occupational Complexity                              | 0.23  | 0.04  | 0.04  | 0.55  | 0.10  | 0.24  |       |       |       |       |       |       |       |       |       |       |       |       |       |      |      |
| 8 Income Tertile                                             | 0.17  | -0.03 | -0.25 | 0.29  | 0.07  | 0.07  | 0.25  |       |       |       |       |       |       |       |       |       |       |       |       |      |      |
| 9 Difficulty Paying Bills                                    | -0.29 | -0.06 | 0.33  | -0.13 | 0.02  | 0.02  | -0.15 | -0.48 |       |       |       |       |       |       |       |       |       |       |       |      |      |
| 10 Active in the World                                       | 0.10  | 0.05  | -0.08 | 0.26  | 0.11  | 0.14  | 0.22  | 0.24  | -0.25 |       |       |       |       |       |       |       |       |       |       |      |      |
| 11 Games                                                     | 0.10  | -0.12 | 0.08  | -0.04 | 0.02  | 0.06  | 0.05  | 0.05  | -0.12 | 0.19  |       |       |       |       |       |       |       |       |       |      |      |
| 12 Outdoor                                                   | 0.05  | 0.09  | -0.09 | 0.12  | 0.02  | 0.07  | 0.08  | 0.16  | -0.21 | 0.31  | 0.21  |       |       |       |       |       |       |       |       |      |      |
| 13 Creative                                                  | 0.02  | 0.02  | 0.06  | 0.05  | 0.08  | 0.06  | 0.06  | 0.05  | -0.05 | 0.33  | 0.25  | 0.41  |       |       |       |       |       |       |       |      |      |
| 14 Religious / Spiritual                                     | 0.08  | -0.08 | -0.04 | 0.00  | 0.04  | -0.02 | 0.00  | 0.06  | -0.11 | 0.29  | 0.20  | 0.23  | 0.34  |       |       |       |       |       |       |      |      |
| 15 Exercise                                                  | -0.03 | 0.18  | -0.15 | 0.18  | 0.16  | 0.07  | 0.06  | 0.22  | -0.26 | 0.36  | 0.11  | 0.43  | 0.25  | 0.16  |       |       |       |       |       |      |      |
| 16 Passive media consumption                                 | -0.10 | 0.06  | 0.10  | -0.11 | -0.17 | -0.08 | -0.06 | -0.13 | 0.01  | -0.03 | 0.19  | 0.02  | 0.07  | -0.02 | -0.02 |       |       |       |       |      |      |
| 17 Shopping / Cooking                                        | -0.05 | -0.02 | -0.06 | -0.07 | -0.06 | -0.01 | -0.08 | 0.08  | -0.11 | 0.24  | 0.25  | 0.30  | 0.34  | 0.27  | 0.23  | 0.18  |       |       |       |      |      |
| 18 Inner Life                                                | 0.13  | -0.02 | 0.03  | 0.14  | 0.03  | 0.09  | 0.11  | 0.12  | -0.19 | 0.12  | 0.44  | 0.19  | 0.18  | 0.13  | 0.17  | 0.20  | 0.12  |       |       |      |      |
| 19 Resilience                                                | 0.08  | 0.08  | -0.31 | 0.12  | 0.09  | 0.04  | -0.01 | 0.24  | -0.39 | 0.25  | -0.05 | 0.23  | 0.07  | 0.08  | 0.28  | -0.09 | 0.13  | 0.04  |       |      |      |
| 20 Healthy_days1                                             | 0.03  | -0.06 | 0.29  | -0.12 | -0.09 | -0.08 | 0.05  | -0.18 | 0.26  | -0.21 | 0.03  | -0.22 | -0.04 | -0.05 | -0.28 | 0.11  | -0.11 | -0.03 | -0.91 |      |      |
| 21 Healthy_days2                                             | -0.23 | -0.08 | 0.21  | -0.08 | -0.05 | 0.04  | -0.06 | -0.24 | 0.43  | -0.22 | 0.06  | -0.15 | -0.10 | -0.12 | -0.16 | 0.04  | -0.12 | -0.04 | -0.71 | 0.36 |      |
| 22 Healthy_days3                                             | -0.09 | -0.05 | 0.29  | -0.11 | -0.10 | -0.04 | -0.04 | -0.24 | 0.35  | -0.19 | 0.02  | -0.19 | -0.03 | -0.07 | -0.27 | 0.09  | -0.13 | -0.02 | -0.66 | 0.59 | 0.48 |
| small correlation: unrelated constructs (0.10 < Pearson's R  |       |       |       |       |       |       |       |       |       |       |       |       |       |       |       |       |       |       |       |      |      |
| moderate correlation: related but not overlapping            |       |       |       |       |       |       |       |       |       |       |       |       |       |       |       |       |       |       |       |      |      |
| large correlation: overlapping constructs ( Pearson's R>0.5) |       |       |       |       |       |       |       |       |       |       |       |       |       |       |       |       |       |       |       |      |      |

| <b>Table 4. Final SEM Mediation Model Including Finance as a Predictor</b>                        |                                   |                      |           |              |                |
|---------------------------------------------------------------------------------------------------|-----------------------------------|----------------------|-----------|--------------|----------------|
|                                                                                                   | <b>Model</b>                      | <b>beta</b>          | <b>se</b> | <b>t</b>     | <b>P value</b> |
|                                                                                                   |                                   |                      |           |              |                |
| Predicting reserve building                                                                       | SES -> Active in the world        | 0.33                 | 0.05      | 6.48         | <b>0.000</b>   |
|                                                                                                   | SES -> Outdoor activities         | 0.14                 | 0.06      | 2.47         | <b>0.014</b>   |
|                                                                                                   | SES -> Exercise                   | 0.19                 | 0.05      | 3.55         | <b>0.000</b>   |
|                                                                                                   | Finance -> Active in the world    | 0.26                 | 0.05      | 4.92         | <b>0.000</b>   |
|                                                                                                   | Finance -> Outdoor activities     | 0.22                 | 0.06      | 4.07         | <b>0.000</b>   |
|                                                                                                   | Finance -> Exercise               | 0.30                 | 0.05      | 6.03         | <b>0.000</b>   |
| Predicting resilience: Direct effects                                                             | SES -> Resilience                 | 0.04                 | 0.06      | 0.71         | 0.476          |
|                                                                                                   | Finance -> Resilience             | 0.31                 | 0.07      | 4.72         | <b>0.000</b>   |
|                                                                                                   | Active in the world -> Resilience | 0.08                 | 0.05      | 1.57         | 0.116          |
|                                                                                                   | Outdoor activities -> Resilience  | 0.07                 | 0.05      | 1.37         | 0.170          |
|                                                                                                   | Exercise -> Resilience            | 0.10                 | 0.05      | 1.88         | 0.060          |
|                                                                                                   | Comorbid Conditions -> Resilience | -0.14                | 0.05      | -2.86        | <b>0.004</b>   |
| Predicting resilience: Total indirect effects                                                     | SES -> Resilience                 | 0.06                 | 0.02      | 2.65         | <b>0.008</b>   |
|                                                                                                   | Finance -> Resilience             | 0.13                 | 0.03      | 4.06         | <b>0.000</b>   |
|                                                                                                   |                                   | <b>R<sup>2</sup></b> | <b>se</b> | <b>t</b>     | <b>P value</b> |
| R square                                                                                          | Education                         | 0.78                 | 0.11      | 6.87         | <b>0.000</b>   |
|                                                                                                   | Father Education                  | 0.59                 | 0.04      | 13.71        | <b>0.000</b>   |
|                                                                                                   | Mother Education                  | 0.55                 | 0.04      | 13.00        | <b>0.000</b>   |
|                                                                                                   | ONET                              | 0.46                 | 0.08      | 6.14         | <b>0.000</b>   |
|                                                                                                   | INCOME                            | 0.63                 | 0.04      | 15.11        | <b>0.000</b>   |
|                                                                                                   | Difficulty paying bills           | 0.58                 | 0.04      | 13.12        | <b>0.000</b>   |
|                                                                                                   | Number of Conditions              | 0.20                 | 0.05      | 3.79         | <b>0.000</b>   |
|                                                                                                   | Active in the world               | 0.18                 | 0.04      | 4.18         | <b>0.000</b>   |
|                                                                                                   | Outdoor activities                | 0.07                 | 0.03      | 2.39         | <b>0.017</b>   |
|                                                                                                   | Exercise                          | 0.13                 | 0.04      | 3.64         | <b>0.000</b>   |
| Resilience                                                                                        | 0.25                              | 0.05                 | 5.54      | <b>0.000</b> |                |
| <b>Model Fit Statistics:</b> $\chi^2=47.4$ , $df=31$ , $p=.03$ ; RMSEA=.035, CFI=0.983, TLI=0.970 |                                   |                      |           |              |                |
| Path coefficients are reflected by " -> "                                                         |                                   |                      |           |              |                |

1  
2  
3  
4  
5  
6  
7  
8  
9  
10  
11  
12  
13  
14  
15  
16  
17  
18  
19  
20  
21  
22  
23  
24  
25  
26  
27  
28  
29  
30  
31  
32  
33  
34  
35  
36  
37  
38  
39  
40  
41  
42  
43  
44  
45  
46  
47

|                                         | Direct Effects |
|-----------------------------------------|----------------|
| Model                                   | Estimate       |
| SES -> Active in the world              | 0.41 ***       |
| SES -> Resilience                       | 0.14 *         |
| Active in the world -> Resilience       | 0.19 ***       |
| Indirect effect                         | 0.08 ***       |
| SES -> Games                            | 0.05           |
| SES -> Resilience                       | 0.20 ***       |
| Games -> Resilience                     | -0.06          |
| Indirect effect                         | 0.00           |
| SES -> Outdoor                          | 0.20 ***       |
| SES -> Resilience                       | 0.16 ***       |
| Outdoor -> Resilience                   | 0.20 ***       |
| Indirect effect                         | 0.04 **        |
| SES -> Creative                         | 0.11           |
| SES -> Resilience                       | 0.19 ***       |
| Creative -> Resilience                  | 0.05           |
| Indirect effect                         | 0.01           |
| SES -> Religious / Spiritual            | 0.04           |
| SES -> Resilience                       | 0.19 ***       |
| Religious / Spiritual -> Resilience     | 0.07           |
| Indirect effect                         | 0.00           |
| SES -> Exercise                         | 0.29 ***       |
| SES -> Resilience                       | 0.15 **        |
| Exercise -> Resilience                  | 0.24 ***       |
| Indirect effect                         | 0.07 *         |
| SES -> Passive Media Consumption        | -0.17 ***      |
| SES -> Resilience                       | 0.18 ***       |
| Passive Media Consumption -> Resilience | -0.06          |
| Indirect effect                         | 0.01           |
| SES -> Shopping / Cooking               | -0.06          |
| SES -> Resilience                       | 0.20 ***       |
| Shopping / Cooking -> Resilience        | 0.14 ***       |
| Indirect effect                         | -0.01          |
| SES -> Inner life                       | 0.23 ***       |
| SES -> Resilience                       | 0.20 ***       |
| Inner life -> Resilience                | -0.01          |
| Indirect effect                         | 0.00           |

† p < 0.10; \* p < 0.05; \*\* p < 0.01; \*\*\* p < 0.001

| <b>Supplementary Table 2. Penultimate SEM Mediation Model Without Including Finance as a Predictor</b> |                                        |                      |           |              |                |
|--------------------------------------------------------------------------------------------------------|----------------------------------------|----------------------|-----------|--------------|----------------|
| <b>Model</b>                                                                                           |                                        | <b>beta</b>          | <b>se</b> | <b>t</b>     | <b>P value</b> |
| Predicting reserve building                                                                            | SES -> Active in the world             | 0.40                 | 0.05      | 7.66         | <b>0.000</b>   |
|                                                                                                        | SES -> Outdoor activities              | 0.20                 | 0.06      | 3.42         | <b>0.001</b>   |
|                                                                                                        | SES -> Exercise                        | 0.27                 | 0.05      | 4.93         | <b>0.000</b>   |
| Predicting resilience: Direct effects                                                                  | SES -> Resilience                      | 0.05                 | 0.06      | 0.86         | 0.389          |
|                                                                                                        | Active in the world -> Resilience      | 0.12                 | 0.05      | 2.41         | 0.016          |
|                                                                                                        | Outdoor activities -> Resilience       | 0.10                 | 0.05      | 2.25         | 0.024          |
|                                                                                                        | Exercise -> Resilience                 | 0.13                 | 0.05      | 2.77         | 0.006          |
|                                                                                                        | Comorbid Conditions -> Resilience      | -0.31                | 0.04      | -7.11        | <b>0.000</b>   |
| Predicting resilience: Total indirect effects                                                          | SES -> Resilience                      | 0.11                 | 0.03      | 3.79         | <b>0.000</b>   |
|                                                                                                        | SES-> Active in the world-> Resilience | 0.05                 | 0.02      | 2.25         | <b>0.025</b>   |
| Predicting resilience: Specific Indirect effects                                                       | SES-> Outdoor activities-> Resilience  | 0.02                 | 0.01      | 1.87         | 0.061          |
|                                                                                                        | SES-> Exercise-> Resilience            | 0.035                | 0.015     | 2.308        | <b>0.021</b>   |
|                                                                                                        |                                        | <b>R<sup>2</sup></b> | <b>se</b> | <b>t</b>     | <b>P value</b> |
| R square                                                                                               | Education                              | 0.60                 | 0.08      | 7.81         | <b>0.000</b>   |
|                                                                                                        | Father Education                       | 0.58                 | 0.04      | 13.92        | <b>0.000</b>   |
|                                                                                                        | Mother Education                       | 0.55                 | 0.04      | 13.17        | <b>0.000</b>   |
|                                                                                                        | ONET                                   | 0.50                 | 0.07      | 7.05         | <b>0.000</b>   |
|                                                                                                        | INCOME                                 | 0.59                 | 0.05      | 12.57        | <b>0.000</b>   |
|                                                                                                        | Difficulty paying bills                | 0.51                 | 0.05      | 10.34        | <b>0.000</b>   |
|                                                                                                        | Active in the world                    | 0.16                 | 0.04      | 3.83         | <b>0.000</b>   |
|                                                                                                        | Outdoor activities                     | 0.04                 | 0.02      | 1.71         | <b>0.087</b>   |
|                                                                                                        | Exercise                               | 0.07                 | 0.03      | 2.46         | <b>0.014</b>   |
| Resilience                                                                                             | 0.19                                   | 0.04                 | 5.29      | <b>0.000</b> |                |

**Model Fit Statistics:**  $\chi^2=229.1$ ,  $df=36$ ,  $p<.01$ ;  $RMSEA=.110$ ,  $CFI=0.796$ ,  $TLI=0.689$

Path coefficients are reflected by " -> "



**STROBE 2007 (v4) checklist of items to be included in reports of observational studies in epidemiology\***  
**Checklist for cohort, case-control, and cross-sectional studies (combined)**

| Section/Topic             | Item # | Recommendation                                                                                                                                                                                                                                                                                                                                                                                                                                                         | Reported on page #     |
|---------------------------|--------|------------------------------------------------------------------------------------------------------------------------------------------------------------------------------------------------------------------------------------------------------------------------------------------------------------------------------------------------------------------------------------------------------------------------------------------------------------------------|------------------------|
| Title and abstract        | 1      | (a) Indicate the study's design with a commonly used term in the title or the abstract                                                                                                                                                                                                                                                                                                                                                                                 | 1                      |
|                           |        | (b) Provide in the abstract an informative and balanced summary of what was done and what was found                                                                                                                                                                                                                                                                                                                                                                    | 3                      |
| <b>Introduction</b>       |        |                                                                                                                                                                                                                                                                                                                                                                                                                                                                        |                        |
| Background/rationale      | 2      | Explain the scientific background and rationale for the investigation being reported                                                                                                                                                                                                                                                                                                                                                                                   | 6                      |
| Objectives                | 3      | State specific objectives, including any pre-specified hypotheses                                                                                                                                                                                                                                                                                                                                                                                                      | 6                      |
| <b>Methods</b>            |        |                                                                                                                                                                                                                                                                                                                                                                                                                                                                        |                        |
| Study design              | 4      | Present key elements of study design early in the paper                                                                                                                                                                                                                                                                                                                                                                                                                | 7                      |
| Setting                   | 5      | Describe the setting, locations, and relevant dates, including periods of recruitment, exposure, follow-up, and data collection                                                                                                                                                                                                                                                                                                                                        | 7                      |
| Participants              | 6      | (a) <i>Cohort study</i> —Give the eligibility criteria, and the sources and methods of selection of participants. Describe methods of follow-up<br><i>Case-control study</i> —Give the eligibility criteria, and the sources and methods of case ascertainment and control selection. Give the rationale for the choice of cases and controls<br><i>Cross-sectional study</i> —Give the eligibility criteria, and the sources and methods of selection of participants | 7                      |
|                           |        | (b) <i>Cohort study</i> —For matched studies, give matching criteria and number of exposed and unexposed<br><i>Case-control study</i> —For matched studies, give matching criteria and the number of controls per case                                                                                                                                                                                                                                                 | NA                     |
| Variables                 | 7      | Clearly define all outcomes, exposures, predictors, potential confounders, and effect modifiers. Give diagnostic criteria, if applicable                                                                                                                                                                                                                                                                                                                               | 8                      |
| Data sources/ measurement | 8*     | For each variable of interest, give sources of data and details of methods of assessment (measurement). Describe comparability of assessment methods if there is more than one group                                                                                                                                                                                                                                                                                   | 8                      |
| Bias                      | 9      | Describe any efforts to address potential sources of bias                                                                                                                                                                                                                                                                                                                                                                                                              | 11-12                  |
| Study size                | 10     | Explain how the study size was arrived at                                                                                                                                                                                                                                                                                                                                                                                                                              | 7                      |
| Quantitative variables    | 11     | Explain how quantitative variables were handled in the analyses. If applicable, describe which groupings were chosen and why                                                                                                                                                                                                                                                                                                                                           | 9-10                   |
| Statistical methods       | 12     | (a) Describe all statistical methods, including those used to control for confounding                                                                                                                                                                                                                                                                                                                                                                                  | 9-10, Supp. Tables 1,2 |
|                           |        | (b) Describe any methods used to examine subgroups and interactions                                                                                                                                                                                                                                                                                                                                                                                                    | NA                     |
|                           |        | (c) Explain how missing data were addressed                                                                                                                                                                                                                                                                                                                                                                                                                            | NA                     |
|                           |        | (d) <i>Cohort study</i> —If applicable, explain how loss to follow-up was addressed<br><i>Case-control study</i> —If applicable, explain how matching of cases and controls was addressed                                                                                                                                                                                                                                                                              | NA                     |

|                          |     |                                                                                                                                                                                                              |                                       |
|--------------------------|-----|--------------------------------------------------------------------------------------------------------------------------------------------------------------------------------------------------------------|---------------------------------------|
|                          |     | <i>Cross-sectional study</i> —If applicable, describe analytical methods taking account of sampling strategy                                                                                                 |                                       |
|                          |     | (e) Describe any sensitivity analyses                                                                                                                                                                        | NA                                    |
| <b>Results</b>           |     |                                                                                                                                                                                                              |                                       |
| Participants             | 13* | (a) Report numbers of individuals at each stage of study—eg numbers potentially eligible, examined for eligibility, confirmed eligible, included in the study, completing follow-up, and analysed            | NA                                    |
|                          |     | (b) Give reasons for non-participation at each stage                                                                                                                                                         | NA                                    |
|                          |     | (c) Consider use of a flow diagram                                                                                                                                                                           | NA                                    |
| Descriptive data         | 14* | (a) Give characteristics of study participants (eg demographic, clinical, social) and information on exposures and potential confounders                                                                     | 10                                    |
|                          |     | (b) Indicate number of participants with missing data for each variable of interest                                                                                                                          | Tables 1,2                            |
|                          |     | (c) <i>Cohort study</i> —Summarise follow-up time (eg, average and total amount)                                                                                                                             | NA                                    |
| Outcome data             | 15* | <i>Cohort study</i> —Report numbers of outcome events or summary measures over time                                                                                                                          |                                       |
|                          |     | <i>Case-control study</i> —Report numbers in each exposure category, or summary measures of exposure                                                                                                         |                                       |
|                          |     | <i>Cross-sectional study</i> —Report numbers of outcome events or summary measures                                                                                                                           | Table 2                               |
| Main results             | 16  | (a) Give unadjusted estimates and, if applicable, confounder-adjusted estimates and their precision (eg, 95% confidence interval). Make clear which confounders were adjusted for and why they were included | 11-13, Tables 3, 4, Supp. Tables 1, 2 |
|                          |     | (b) Report category boundaries when continuous variables were categorized                                                                                                                                    | NA                                    |
|                          |     | (c) If relevant, consider translating estimates of relative risk into absolute risk for a meaningful time period                                                                                             | NA                                    |
| Other analyses           | 17  | Report other analyses done—eg analyses of subgroups and interactions, and sensitivity analyses                                                                                                               | Tables 3, 4, Supp. Tables 1, 2        |
| <b>Discussion</b>        |     |                                                                                                                                                                                                              |                                       |
| Key results              | 18  | Summarise key results with reference to study objectives                                                                                                                                                     | 14-16                                 |
| Limitations              | 19  | Discuss limitations of the study, taking into account sources of potential bias or imprecision. Discuss both direction and magnitude of any potential bias                                                   | 5, 15                                 |
| Interpretation           | 20  | Give a cautious overall interpretation of results considering objectives, limitations, multiplicity of analyses, results from similar studies, and other relevant evidence                                   | 14-16                                 |
| Generalisability         | 21  | Discuss the generalisability (external validity) of the study results                                                                                                                                        | 15                                    |
| <b>Other information</b> |     |                                                                                                                                                                                                              |                                       |
| Funding                  | 22  | Give the source of funding and the role of the funders for the present study and, if applicable, for the original study on which the present article is based                                                | 16                                    |

\*Give information separately for cases and controls in case-control studies and, if applicable, for exposed and unexposed groups in cohort and cross-sectional studies.

1  
2  
3  
4  
5  
6  
7  
8  
9  
10  
11  
12  
13  
14  
15  
16  
17  
18  
19  
20  
21  
22  
23  
24  
25  
26  
27  
28  
29  
30  
31  
32  
33  
34  
35  
36  
37  
38  
39  
40  
41  
42  
43  
44  
45  
46  
47

**Note:** An Explanation and Elaboration article discusses each checklist item and gives methodological background and published examples of transparent reporting. The STROBE checklist is best used in conjunction with this article (freely available on the Web sites of PLoS Medicine at <http://www.plosmedicine.org/>, Annals of Internal Medicine at <http://www.annals.org/>, and Epidemiology at <http://www.epidem.com/>). Information on the STROBE Initiative is available at [www.strobe-statement.org](http://www.strobe-statement.org).

For peer review only

# BMJ Open

**Is the link between socioeconomic status and resilience mediated by reserve-building activities?  
Mediation analysis of web-based cross-sectional data from chronic medical illness patient panels**

|                                 |                                                                                                                                                                                                                                                                                                                                                       |
|---------------------------------|-------------------------------------------------------------------------------------------------------------------------------------------------------------------------------------------------------------------------------------------------------------------------------------------------------------------------------------------------------|
| Journal:                        | <i>BMJ Open</i>                                                                                                                                                                                                                                                                                                                                       |
| Manuscript ID                   | bmjopen-2018-025602.R1                                                                                                                                                                                                                                                                                                                                |
| Article Type:                   | Research                                                                                                                                                                                                                                                                                                                                              |
| Date Submitted by the Author:   | 09-Nov-2018                                                                                                                                                                                                                                                                                                                                           |
| Complete List of Authors:       | Schwartz, Carolyn; DeltaQuest Foundation, Inc., ; Tufts University School of Medicine, Medicine & Orthopaedic Surgery<br>Zhang, Jie; DeltaQuest Foundation, Inc.<br>Stucky, Brian; Los Alamos National Laboratory<br>Michael, Wesley; Rare Patient Voice, LLC<br>Rapkin, Bruce; Albert Einstein College of Medicine, Epidemiology & Population Health |
| <b>Primary Subject Heading</b>: | Public health                                                                                                                                                                                                                                                                                                                                         |
| Secondary Subject Heading:      | Patient-centred medicine                                                                                                                                                                                                                                                                                                                              |
| Keywords:                       | cognitive reserve, socioeconomic status, social determinants of health, resilience, chronic illness                                                                                                                                                                                                                                                   |
|                                 |                                                                                                                                                                                                                                                                                                                                                       |

SCHOLARONE™  
Manuscripts

1  
2  
3  
4 Is the link between socioeconomic status and resilience mediated by reserve-building activities?

5  
6 Mediation analysis of web-based cross-sectional data from chronic medical illness patient panels  
7  
8  
9

10  
11 Carolyn E. Schwartz, Sc.D.<sup>1,2\*</sup>, Jie Zhang, M.P.H.<sup>1</sup>, Brian D. Stucky, Ph.D.<sup>3</sup>, Wesley Michael, M.B.A.<sup>4</sup>,  
12  
13 Bruce D. Rapkin, Ph.D.<sup>5</sup>  
14

15  
16 1 DeltaQuest Foundation, Inc., Concord, MA, USA

17  
18 2 Departments of Medicine and Orthopaedic Surgery, Tufts University Medical School, Boston,  
19  
20 MA, USA  
21

22  
23 3 Los Alamos National Laboratory, Santa Fe, NM, USA  
24

25  
26 4 Rare Patient Voice, LLC, Towson, MD, USA

27  
28 5 Department of Epidemiology and Population Health, Division of Community Collaboration &  
29  
30 Implementation Science, Albert Einstein College of Medicine, Bronx, NY, USA  
31

32 **Corresponding author:**  
33

34 Carolyn Schwartz, Sc.D., DeltaQuest Foundation, Inc.  
35

36  
37 31 Mitchell Road  
38

39  
40 Concord, MA 01742  
41

42  
43 Phone 978 318 7914  
44

45  
46 [carolyn.schwartz@deltaquest.org](mailto:carolyn.schwartz@deltaquest.org)  
47

48 **Word Count:** 3,525  
49  
50  
51  
52  
53  
54  
55  
56  
57  
58  
59  
60

**Author Contributorship Statement:**

*Conceptualize and designed study:* CES, BDS, BDR

*Access to sample:* WM

*Data collection:* CES, JZ, WM

*Data Analysis:* CES, JZ, BDS, BDR

*Interpretation of findings:* CES, JZ, BDS, BDR

*Manuscript writing/editing:* CES, JZ, WM, BDS, BDR

## Abstract

**Objectives:** The purpose of this study is to test the hypothesis that the link between socioeconomic status (SES) and resilience is mediated by reserve-building activities.

**Design:** Cross-sectional observational study. Structural equation modeling (SEM) was used to test the mediation hypothesis.

**Setting:** Web-based survey

**Participants:** Participants with a chronic medical condition were recruited from Rare Patient Voice, LLC

**Primary and Secondary Outcome Measures:** DeltaQuest Reserve-Building Measure; demographic variables to capture SES; Centers for Disease Control Healthy Days Core Module; Self-Administered Comorbidity Questionnaire. Resilience was operationalized using residual modeling.

**Results:** The study sample included 442 patients (mean age 49, 85% female). SES was modeled as a bifactor model comprised of General SES and specific factors for Personal Finance and Parent's Education. A series of simple mediation models predicting Resilience led to the selection of three Reserve-Building activities for subsequent SEM-based mediation models: Active in the World, Outdoor, and Exercise. The full SEM model supported the hypothesis that the relationships from both General SES and Personal Finance to Resilience were mediated by engaging in the three Reserve-Building activities. In addition, number of comorbidities partially mediated the relationship between Personal Finance and Reserve-Building. Those with more comorbidities generally had lower levels of Resilience.

**Conclusions:** This study provides suggestive evidence that reserve-building activities may be one pathway by which SES is associated with resilience: people of higher SES are more likely to engage in reserve-building activities that are intellectually stimulating, involve outdoor pursuits, and include

1 physical exercise. These reserve-building activities are not costly to pursue. These findings may  
2  
3 empower patients to introduce more such reserve-building activities into their lives.  
4

5  
6 **Key Words:** cognitive reserve; socioeconomic status; social determinants of health; resilience,  
7  
8 chronic illness  
9

10  
11  
12  
13  
14  
15  
16  
17  
18  
19  
20  
21  
22  
23  
24  
25  
26  
27  
28  
29  
30  
31  
32  
33  
34  
35  
36  
37  
38  
39  
40  
41  
42  
43  
44  
45  
46  
47  
48  
49  
50  
51  
52  
53  
54  
55  
56  
57  
58  
59  
60

For peer review only



## Article Summary

### Strengths and Limitations of this study

- While the sample is heterogeneous in its illness representation, it is predominantly comprised of middle-aged white females who are married or living with family members.
- The data are also cross-sectional, limiting our ability to test mediation effects with certainty or causal effects.
- There are potential confounding factors, such as structural environmental factors, that were not addressed in the analysis. For example, while it may be true that many of the reserve-building activities are free or inexpensive, that does not mean that they are equally accessible across the SES continuum.

## Introduction

Substantial health disparities exist in the United States, despite 18% of the gross national product expenditures being on health care<sup>1</sup>. A large literature has documented the relationship between socioeconomic status (SES) on morbidity and mortality<sup>2,3</sup>, and has shown that this relationship does not simply reflect the effects of poverty<sup>4</sup>. This SES-morbidity relationship is similar across income groups, extending beyond poverty to explain relative differences in health among higher SES groups as well<sup>2,4</sup>. The SES-health connection may relate to patterns of social behavior and interpersonal experiences that either promote disease or protect against it<sup>4,5</sup>.

Recent work on the concept of reserve and reserve-building activities may provide a useful mechanism by which (high) SES buffers health. Building on observational work in patient populations with neurological disease, a substantial body of research has documented that past and current engagement in activities that stimulate the brain may buffer against disease progression in people with multiple sclerosis, Alzheimer's disease, or other neurological conditions<sup>6-8</sup>, and may be protective against cognitive impairment after chemotherapy in cancer patients<sup>9</sup>. The past and current "reserve-building activities"<sup>10,11</sup> may reflect not only whole-brain stimulation (e.g., education, childhood enrichment activities) but also "multiple intelligences" (i.e., skills ranging across intellectual, artistic, and physical pursuits)<sup>12</sup>. Thus, engaging in reserve-building activities may promote better health outcomes across the health-illness spectrum (i.e., resilience) by helping the individual to stimulate the brain; and to remain flexible and with higher plasticity<sup>10,13-16</sup>. This flexibility may translate to more adaptive ways of coping<sup>17</sup>, as well as to appraisal processes that emphasize the positive and focus on aspects of their life that are more controllable<sup>18</sup>.

To date, the fields of social determinants of health and reserve have remained distinct. Their inter-connection led to the present study involving a heterogeneous cohort of people with chronic illness. We seek to test the hypothesis that the SES-resilience link is mediated by reserve-building activities.

## Methods

### Sample

Eligible participants were patients with a chronic medical condition of age 18 years or older, and able to complete an online questionnaire. Participants were recruited from Rare Patient Voice, LLC and WhatNext panels, which include people with diagnoses of a heterogeneous grouping of chronic health conditions (Rare Patient Voice) and cancer (WhatNext). The panel participants were recruited in-person at conferences and gatherings of disease-specific organizations.

### Patient and Public Involvement

The present study did not directly involve patients or the public in its design. It did, however, follow-up on a decade-long evolution. The concept of reserve-building evolved over a decade of research with chronically ill patients. The measure of reserve-building was developed over a period of seven years, involving patient feedback and input on item development, and cognitive interviews of earlier versions of the measure. Finally, the research question “Is reserve-building only available to patients with substantial financial and other socioeconomic resources?” was formulated by patients in open question-and-answer sessions directed at the first author at conference presentations. Results of this research path have been provided to study participants in the form of lay-language slide presentations supplied by the first author.

### Procedure and Design

A web-based survey was administered in Spring 2016 using the HIPAA-compliant, secure SurveyGizmo engine ([www.surveygizmo.com](http://www.surveygizmo.com)). Email invitations were sent to panel members using their standard protocol for notifying panel participants of study opportunities. No financial or other incentives were offered to participants. We followed study procedures described by Dillman’s Tailored Design Method<sup>19</sup>. The survey began with an informed consent form that participants endorsed prior to completing the questionnaires. The study was reviewed and approved by the New England Review Board (NEIRB#15-254), and conforms to the principles embodied in the Declaration of Helsinki.

## Measures

**Reserve-Building** was measured with subscales from the validated *DeltaQuest Reserve-Building Measure*<sup>20</sup> assessing current reserve-building activities, past reserve-building activities, and person characteristics (see<sup>10</sup> for full details of reliability and validity of the measure). The present study included the nine Current-Reserve-Building Activities subscales: Active in the World (e.g., attending lectures; 3 items), Games (e.g., puzzles; 3 items), Outdoors (e.g., spending time outdoors; 3 items), Creative (e.g., hobbies involving working with one's hands; 4 items), Religious/Spiritual (e.g., individual or group religious; 3 items), Exercise (e.g., mild, moderate and strenuous exercise; 4 items), Inner Life (e.g., reading; 3 items), Shopping/Cooking (e.g., cooking as a hobby; 2 items), and Passive Media Consumption (e.g., watching television; 3 items). Person Factors related to reserve-building included subscales for Perseverance (5 items), Work Value (2 items), and Current Social Support (5 items)(see<sup>20</sup> for psychometric details).

To capture SES-related variables, we included the following variables from the DeltaQuest Reserve-Building measure's past reserve-building subscales: self and parent education, income, and occupational complexity. Occupational complexity was assessed using a series of skip-logic questions querying the job that was closest to the respondent's current or past occupation, which were then scored for complexity using the O\*NET system<sup>21</sup>. Additionally, we included an item asking about the respondent's difficulty paying bills<sup>22</sup>. This item was reverse-coded so that higher scores reflected *lower* difficulty paying bills.

**Resilience** was measured using a residual model approach described below in Statistical Analysis. Items from the *Centers for Disease Control (CDC) Healthy Days Core Module*<sup>23</sup> was used to create the Resilience score, consistent with prior work done by members of our group<sup>24</sup>. Two items ask the respondent to indicate how many days of the past 30 days their physical (Physical Health Problems) or mental (Mental Health Problems) health, respectively, was not good. A third item (Activities of Daily

1 Living Impaired (ADL Impaired)) asks how many days of the past 30 the respondent's poor physical  
2  
3 or mental health kept them from doing their usual activities, such as self-care, work, or recreation.  
4  
5

6 Respondent **demographic characteristics** included age, gender, cohabitation/marital status, with  
7  
8 whom the person lives, employment status, annual household income categories, and number of  
9  
10 comorbidities, as measured by the *Self-Administered Comorbidity Questionnaire* <sup>25</sup>.  
11  
12  
13

### 14 **Statistical Analysis**

15 To operationalize Resilience, we built on a precedent for using residual modeling to study  
16  
17 epiphenomena <sup>26-28</sup>. We computed a regression model with the CDC Healthy Days ADL Impaired as  
18  
19 the dependent variable, and Physical Health Problems, Mental Health Problems, and their interaction  
20  
21 as predictors. The residuals from the regression model were saved and multiplied by negative one (-  
22  
23 1). Thus, a high Resilience score reflects fewer-than-expected days that the respondent is unable to  
24  
25 function due to physical or mental health problems or the synergistic effect of physical and mental  
26  
27 health problems <sup>24</sup>.  
28  
29  
30  
31

32 General SES was operationalized using a bifactor methodology (e.g., <sup>29 30</sup>). In a bifactor model, factor  
33  
34 loadings on the single *general* factor reflect the magnitude of relationships between the variables  
35  
36 (e.g., self and parent education, income, and occupational complexity) and general SES. In the  
37  
38 bifactor context, shared content between subsets of variables is captured by a second loading on a  
39  
40 content-*specific* factor. For example, the residual correlation between mother's and father's education  
41  
42 may be captured by the specific factor Parent's Education. Similarly, the residual correlation between  
43  
44 income and difficulty paying bills is captured by the specific factor Personal Finance. In this manner,  
45  
46 the bifactor model accounts for dependencies between items when establishing a total SES score.  
47  
48  
49  
50

51 Mediation models were conducted within a structural equation modeling (SEM) framework. It was  
52  
53 hypothesized that Reserve-Building activities would mediate the relationship between SES and  
54  
55 Resilience. In mediation analyses there are two types of relationships (*pathways*) to consider. There  
56  
57  
58  
59  
60

1 is the *direct effect* from SES to Resilience, and there is the *indirect effect* from SES to Resilience  
2  
3 through both variables' relationship with Reserve-Building (the *mediator*; See Figure 1). In this  
4  
5 instance, mediation occurs when some (partial) or all (full) of the direct effect between SES and  
6  
7 Resilience is accounted for by the indirect effect through Reserve-Building.  
8  
9

10 [FIGURE 1 NEAR HERE]  
11  
12

13 SEM mediation analyses were conducted using Mplus version 7 software. Model fit was evaluated  
14  
15 using the following indices:  $RMSEA \leq .08$ ,  $TLI \geq .95$ , and  $CFI \geq .95$ ;<sup>31 32</sup>. Analyses of observed variables  
16  
17 were conducted using Stata 15<sup>33</sup> and SPSS 24<sup>34</sup>. Pearson correlations were evaluated using  
18  
19 Cohen's criteria for delineating small ( $0.10 < r < 0.30$ ), medium ( $0.30 < r < 0.50$ ), and large ( $r > 0.50$ )  
20  
21 effect sizes, hereafter referred to as small, medium and large correlations<sup>35</sup>. We examined  
22  
23 distributions of all variables to be included in the analysis.  
24  
25  
26  
27

## 28 Results

### 29 Sample

30 The study sample included 442 patients. Table 1 provides the sociodemographic characteristics, ICD-  
31  
32 10 categories, and reported comorbidities of this heterogeneous sample. The sample had a mean  
33  
34 age of 49, and 85% were female. Most respondents were married and living with spouse and/or  
35  
36 family members. The most prevalent ICD-10 index health conditions (i.e., for panel membership)  
37  
38 were diseases of the nervous system followed by neoplasms, and endocrine diseases. The most  
39  
40 prevalent co-morbidities were back pain, depression, and insomnia. Sixty-nine percent of the sample  
41  
42 reported a family income of less than \$100,000 annually, and 69% of the sample reported that it was  
43  
44 somewhat, very, or extremely difficult to pay their bills. The majority of the sample reported past or  
45  
46 current occupations reflecting little to medium preparation needed.  
47  
48  
49  
50  
51  
52  
53  
54  
55  
56  
57  
58  
59  
60

1  
2  
3  
4  
5  
6  
7  
8  
9  
10  
11  
12  
13  
14  
15  
16  
17  
18  
19  
20  
21  
22  
23  
24  
25  
26  
27  
28  
29  
30  
31  
32  
33  
34  
35  
36  
37  
38  
39  
40  
41  
42  
43  
44  
45  
46  
47  
48  
49  
50  
51  
52  
53  
54  
55  
56  
57  
58  
59  
60

| <b>Variable</b>                                      |                                                                               |              |
|------------------------------------------------------|-------------------------------------------------------------------------------|--------------|
| <b>n</b>                                             |                                                                               | 442          |
| <b>Age</b>                                           | Mean (sd)                                                                     | 48.97(12.96) |
| <b>Gender (%)</b>                                    | Male                                                                          | 15%          |
|                                                      | Female                                                                        | 85%          |
| <b>ICD-10 Diagnostic Category of Index Condition</b> | Certain infectious and parasitic diseases                                     | 1%           |
|                                                      | Neoplasms                                                                     | 25%          |
|                                                      | Diseases of the blood and blood-forming organs and immune mechanism disorders | 5%           |
|                                                      | Endocrine, nutritional and metabolic diseases                                 | 6%           |
|                                                      | Mental and behavioral disorders                                               | 3%           |
|                                                      | Diseases of the nervous system                                                | 42%          |
|                                                      | Diseases of the ear and mastoid process                                       | 0%           |
|                                                      | Diseases of the circulatory system                                            | 3%           |
|                                                      | Diseases of the respiratory system                                            | 3%           |
|                                                      | Diseases of the digestive system                                              | 1%           |
|                                                      | Diseases of the skin and subcutaneous tissue                                  | 1%           |
|                                                      | Diseases of the musculoskeletal system and connective tissue                  | 6%           |
|                                                      | Diseases of the genitourinary system                                          | 0%           |
|                                                      | Congenital malformations, deformations and chromosomal abnormalities          | 1%           |
| <b>Comorbidities (%)</b>                             | Arthritis                                                                     | 38%          |
|                                                      | Asthma                                                                        | 19%          |
|                                                      | Back Pain                                                                     | 58%          |
|                                                      | Cancer (now or in the past)                                                   | 31%          |
|                                                      | Depression                                                                    | 52%          |
|                                                      | Diabetes                                                                      | 10%          |
|                                                      | Heart Disease                                                                 | 10%          |
|                                                      | High Blood Pressure                                                           | 31%          |
|                                                      | Insomnia                                                                      | 43%          |
|                                                      | Kidney Disease                                                                | 5%           |
|                                                      | Liver Disease                                                                 | 3%           |
|                                                      | Lung Disease                                                                  | 11%          |
| Stroke                                               | 2%                                                                            |              |
| Ulcer or stomach disease                             | 13%                                                                           |              |
| <b>Education (%)</b>                                 | High school or less                                                           | 14%          |
|                                                      | Some college                                                                  | 38%          |
|                                                      | College degree                                                                | 27%          |
|                                                      | Graduate degree                                                               | 20%          |
|                                                      | Missing                                                                       | 0%           |
| <b>Father's Education</b>                            | High school or less                                                           | 48%          |
|                                                      | Some college                                                                  | 22%          |
|                                                      | College degree                                                                | 14%          |
|                                                      | Graduate degree                                                               | 11%          |

## Reserve-Building and SES, page 12

|                                                                                                |                                            |     |
|------------------------------------------------------------------------------------------------|--------------------------------------------|-----|
|                                                                                                | Missing                                    | 5%  |
| <b>Mother's Education</b>                                                                      | High school or less                        | 49% |
|                                                                                                | Some college                               | 30% |
|                                                                                                | College degree                             | 11% |
|                                                                                                | Graduate degree                            | 8%  |
|                                                                                                | Missing                                    | 2%  |
| <b>Marital Status (%)</b>                                                                      | Never Married                              | 15% |
|                                                                                                | Married                                    | 60% |
|                                                                                                | Cohabitation/ Domestic Partnership         | 7%  |
|                                                                                                | Separated                                  | 2%  |
|                                                                                                | Divorced                                   | 13% |
|                                                                                                | Widowed                                    | 2%  |
|                                                                                                | Missing                                    | 1%  |
| <b>Living Situation* (%)</b>                                                                   | Spouse/ Partner                            | 69% |
|                                                                                                | Other Relative (children, sibling, parent) | 44% |
|                                                                                                | Friend/ Companion                          | 4%  |
|                                                                                                | Pet(s)                                     | 48% |
|                                                                                                | Alone                                      | 11% |
|                                                                                                | Other                                      | 1%  |
| <b>Income (%)</b>                                                                              | Less than \$15,000                         | 11% |
|                                                                                                | \$15,001 to \$30,000                       | 14% |
|                                                                                                | \$30,001 to \$50,000                       | 17% |
|                                                                                                | \$50,001 to \$100,000                      | 27% |
|                                                                                                | \$100,001 to \$150,000                     | 13% |
|                                                                                                | \$150,001 to 200,000                       | 4%  |
|                                                                                                | Over \$200,000                             | 2%  |
|                                                                                                | Missing                                    | 12% |
| <b>Difficulty paying bills</b>                                                                 | Extremely difficult                        | 28% |
|                                                                                                | Very difficult                             | 16% |
|                                                                                                | Somewhat difficult                         | 24% |
|                                                                                                | Slightly difficult                         | 12% |
|                                                                                                | Not difficult at all                       | 16% |
|                                                                                                | Missing                                    | 3%  |
| <b>Occupational Complexity (ONET Job Zone)</b>                                                 | 1: Little or No Preparation Needed         | 5%  |
|                                                                                                | 2: Some Preparation Needed                 | 23% |
|                                                                                                | 3: Medium Preparation Needed               | 24% |
|                                                                                                | 4: Considerable Preparation Needed         | 22% |
|                                                                                                | 5: Extensive Preparation Needed            | 7%  |
|                                                                                                | Missing                                    | 19% |
| <i>*May add up to more than 100% because respondents were allowed to check all that apply.</i> |                                            |     |



1  
2  
3  
4 Table 2 shows descriptive statistics of the reserve-building, person factors and demographic scores  
5  
6 used to create the SES latent variable scores. Mother's education level was positively skewed,  
7  
8 suggesting that most participants reported relatively low levels of maternal education. Two of the  
9  
10 current Reserve-Building subscales were negatively skewed (Passive Media Consumption, Inner  
11  
12 Life), suggested that most people spent substantial amounts of time in both of these types of  
13  
14 activities. The other variables tested in the SEM model were normally distributed.  
15  
16  
17  
18  
19  
20  
21  
22  
23  
24  
25  
26  
27  
28  
29  
30  
31  
32  
33  
34  
35  
36  
37  
38  
39  
40  
41  
42  
43  
44  
45  
46  
47  
48  
49  
50  
51  
52  
53  
54  
55  
56  
57  
58  
59  
60

| <b>Table 2. Descriptive Statistics of Variables Used In SEM Analysis</b> |            |               |                            |                 |
|--------------------------------------------------------------------------|------------|---------------|----------------------------|-----------------|
|                                                                          | <b>Obs</b> | <b>Median</b> | <b>Variable Label</b>      | <b>Skewness</b> |
| <b>General SES</b>                                                       |            |               |                            |                 |
| Participant's Education                                                  | 440        | 2             | High School Diploma or GED | 0.11            |
| Mother's Education                                                       | 431        | 1             | Some High School or Less   | <b>1.05</b>     |
| Father's Education                                                       | 418        | 1             | Some High School or Less   | 0.85            |
| Job Complexity                                                           | 358        | 3             | Medium Preparation Needed  | 0.03            |
| <b>Personal Finance</b>                                                  |            |               |                            |                 |
| Income                                                                   | 387        | 4             | \$50,001 to \$100,000      | 0.12            |
| Difficulty Paying Bills                                                  | 428        | 3             | Somewhat difficult         | 0.27            |
|                                                                          | <b>Obs</b> | <b>Mean</b>   | <b>Std. Dev.</b>           | <b>Skewness</b> |
| <b>Current Reserve-Building Subscales</b>                                |            |               |                            |                 |
| Active in the World                                                      | 439        | 49.91         | 7.65                       | 0.65            |
| Games                                                                    | 332        | 49.60         | 6.90                       | -0.10           |
| Outdoor                                                                  | 438        | 49.40         | 7.63                       | 0.35            |
| Creative                                                                 | 440        | 50.03         | 7.03                       | 0.47            |
| Religious / Spiritual                                                    | 437        | 49.97         | 7.68                       | 0.45            |
| Exercise                                                                 | 435        | 49.42         | 7.29                       | 0.60            |
| Passive Media Consumption                                                | 434        | 50.27         | 6.75                       | <b>-1.25</b>    |
| Shopping / Cooking                                                       | 438        | 49.86         | 8.01                       | 0.36            |
| Inner life                                                               | 334        | 50.39         | 6.71                       | <b>-1.17</b>    |
| <b>Resilience</b>                                                        | 442        | -0.11         | 1.02                       | -0.19           |
| <b>Covariate</b>                                                         |            |               |                            |                 |
| Number of Comorbidities                                                  | 442        | 5.43          | 3.68                       | 0.81            |

Table 3 shows Pearson correlation coefficients among the variables considered in the current study.

It revealed that the socioeconomic indices generally had small correlations, although mother's and father's education had moderate correlations, and difficulty paying bills had a moderate correlation with number of comorbidities. The Reserve-Building subscales generally had small or negligible correlations with socioeconomic indices, and small to moderate inter-correlations. The Reserve-Building measures generally had small or negligible correlations with the resilience score. Four Reserve-Building scores had small correlations with Resilience: Active in the World, Outdoors,

1 Exercise, and Shopping/Cooking. The resilience score was most driven by (fewer) number of days  
2  
3 with physical health problems. Resilience had a moderate negative correlation with number of  
4  
5 comorbidities and difficulty paying bills, and small positive correlations with respondent's education  
6  
7 and income tertile. Resilience was not correlated with mother's education, father's education, or job  
8  
9 complexity. The correlation matrix providing a starting point for parsimonious SEM model building,  
10  
11 suggesting that the socioeconomic indicators be modeled as a latent variable(s), and considering only  
12  
13 four of the nine Reserve-Building scores in the model: Active in the World, Outdoor, Exercise, and  
14  
15 Shopping/Cooking.  
16  
17  
18  
19  
20  
21  
22  
23  
24  
25  
26  
27  
28  
29  
30  
31  
32  
33  
34  
35  
36  
37  
38  
39  
40  
41  
42  
43  
44  
45  
46  
47  
48  
49  
50  
51  
52  
53  
54  
55  
56  
57  
58  
59  
60

**Table 3. Correlation Matrix of Variables Included in SEM Modeling**

|                                 | 1     | 2     | 3    | 4    | 5    | 6    | 7    | 8    | 9    | 10   | 11   | 12   | 13   | 14   | 15   | 16   | 17   | 18   | 19   | 20   | 21   |
|---------------------------------|-------|-------|------|------|------|------|------|------|------|------|------|------|------|------|------|------|------|------|------|------|------|
| 1 Age                           |       |       |      |      |      |      |      |      |      |      |      |      |      |      |      |      |      |      |      |      |      |
| 2 Gender                        | 0.04  |       |      |      |      |      |      |      |      |      |      |      |      |      |      |      |      |      |      |      |      |
| 3 No. conditions                | 0.20  | -0.09 |      |      |      |      |      |      |      |      |      |      |      |      |      |      |      |      |      |      |      |
| 4 Respondent's Education        | 0.13  | 0.03  | 0.12 |      |      |      |      |      |      |      |      |      |      |      |      |      |      |      |      |      |      |
| 5 Mother's Education            | -0.15 | 0.06  | 0.05 | 0.19 |      |      |      |      |      |      |      |      |      |      |      |      |      |      |      |      |      |
| 6 Father's Education            | -0.09 | 0.02  | 0.05 | 0.26 | 0.46 |      |      |      |      |      |      |      |      |      |      |      |      |      |      |      |      |
| 7 O*NET Occupational Complexity | 0.23  | 0.04  | 0.04 | 0.55 | 0.10 | 0.24 |      |      |      |      |      |      |      |      |      |      |      |      |      |      |      |
| 8 Income Tertile                | 0.17  | -0.03 | 0.25 | 0.29 | 0.07 | 0.07 | 0.25 |      |      |      |      |      |      |      |      |      |      |      |      |      |      |
| 9 Difficulty Paying Bills       | -0.29 | -0.06 | 0.33 | 0.13 | 0.02 | 0.02 | 0.15 | 0.48 |      |      |      |      |      |      |      |      |      |      |      |      |      |
| 10 Active in the World          | 0.10  | 0.05  | 0.08 | 0.26 | 0.11 | 0.14 | 0.22 | 0.24 | 0.25 |      |      |      |      |      |      |      |      |      |      |      |      |
| 11 Games                        | 0.10  | -0.12 | 0.08 | 0.04 | 0.02 | 0.06 | 0.05 | 0.05 | 0.12 | 0.19 |      |      |      |      |      |      |      |      |      |      |      |
| 12 Outdoor                      | 0.05  | 0.09  | 0.09 | 0.12 | 0.02 | 0.07 | 0.08 | 0.16 | 0.21 | 0.31 | 0.21 |      |      |      |      |      |      |      |      |      |      |
| 13 Creative                     | 0.02  | 0.02  | 0.06 | 0.05 | 0.08 | 0.06 | 0.06 | 0.05 | 0.05 | 0.33 | 0.25 | 0.41 |      |      |      |      |      |      |      |      |      |
| 14 Religious / Spiritual        | 0.08  | -0.08 | 0.04 | 0.00 | 0.04 | 0.02 | 0.00 | 0.06 | 0.11 | 0.29 | 0.20 | 0.23 | 0.34 |      |      |      |      |      |      |      |      |
| 15 Exercise                     | -0.03 | 0.18  | 0.15 | 0.18 | 0.16 | 0.07 | 0.06 | 0.22 | 0.26 | 0.36 | 0.11 | 0.43 | 0.25 | 0.16 |      |      |      |      |      |      |      |
| 16 Passive media consumption    | -0.10 | 0.06  | 0.10 | 0.11 | 0.17 | 0.08 | 0.06 | 0.13 | 0.01 | 0.03 | 0.19 | 0.02 | 0.07 | 0.02 | 0.02 |      |      |      |      |      |      |
| 17 Shopping / Cooking           | -0.05 | -0.02 | 0.06 | 0.07 | 0.06 | 0.01 | 0.08 | 0.08 | 0.11 | 0.24 | 0.25 | 0.30 | 0.34 | 0.27 | 0.23 | 0.18 |      |      |      |      |      |
| 18 Inner Life                   | 0.13  | -0.02 | 0.03 | 0.14 | 0.03 | 0.09 | 0.11 | 0.12 | 0.19 | 0.12 | 0.44 | 0.19 | 0.18 | 0.13 | 0.17 | 0.20 | 0.12 |      |      |      |      |
| 19 Resilience                   | 0.08  | 0.08  | 0.31 | 0.12 | 0.09 | 0.04 | 0.01 | 0.24 | 0.39 | 0.25 | 0.05 | 0.23 | 0.07 | 0.08 | 0.28 | 0.09 | 0.13 | 0.04 |      |      |      |
| 20 Healthy_days1                | 0.03  | -0.06 | 0.29 | 0.12 | 0.09 | 0.08 | 0.05 | 0.18 | 0.26 | 0.21 | 0.03 | 0.22 | 0.04 | 0.05 | 0.28 | 0.11 | 0.11 | 0.03 | 0.91 |      |      |
| 21 Healthy_days2                | -0.23 | -0.08 | 0.21 | 0.08 | 0.05 | 0.04 | 0.06 | 0.24 | 0.43 | 0.22 | 0.06 | 0.15 | 0.10 | 0.12 | 0.16 | 0.04 | 0.12 | 0.04 | 0.71 | 0.36 |      |
| 22 Healthy_days3                | -0.09 | -0.05 | 0.29 | -    | -    | -    | -    | -    | 0.35 | -    | 0.02 | -    | -    | -    | -    | 0.09 | -    | -    | -    | 0.59 | 0.48 |

1  
2  
3  
4  
5  
6  
7  
8  
9  
10  
11  
12  
13  
14  
15  
16  
17  
18  
19  
20  
21  
22  
23  
24  
25  
26  
27  
28  
29  
30  
31  
32  
33  
34  
35  
36  
37  
38  
39  
40  
41  
42  
43  
44  
45  
46  
47

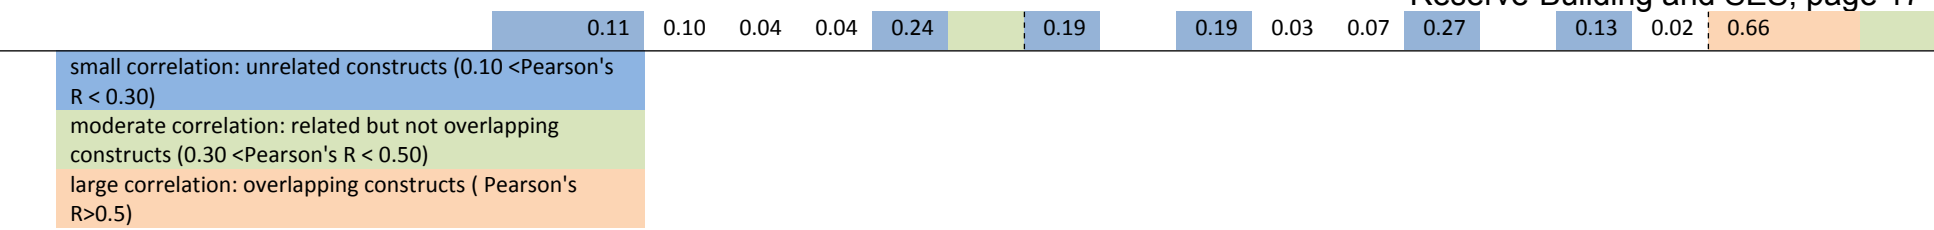

small correlation: unrelated constructs (0.10 < Pearson's R < 0.30)

moderate correlation: related but not overlapping constructs (0.30 < Pearson's R < 0.50)

large correlation: overlapping constructs ( Pearson's R > 0.5)

For peer review only

### Step 1: Bifactor model of SES

We first modeled SES as a bifactor model with the general factor comprised of respondent's education, father's education, mother's education, occupational complexity, income tertile, and endorsed difficulty paying bills (Supplementary Figure 1). The specific (i.e., orthogonal) factors in the bifactor model account for residual covariance between Parent's Education (mother's and father's education) and Personal Finance (income and difficulty paying bills). Note that the magnitude of the general factor loadings is small for those items that also have factor loadings on Parent's Education and Personal Finance. This pattern is due to the strength of the covariance between these item subsets, and is reflected in the relatively high loadings on the specific factors. The bifactor SES model closely fit the data ( $\chi^2=9.3$ ,  $df=7$ ,  $p=.23$ ;  $RMSEA=.027$ ,  $CFI=0.996$ ,  $TLI=0.992$ ) and provided a starting point for subsequent mediation models.

### Step 2: Simple mediation models for Reserve-Building activities

We next evaluated a series of simple mediation models where each of the nine Reserve-Building activities mediated the relationship between the general SES factor and Resilience (Supplementary Table 1). The results of these models led to the selection of three Reserve-Building activities for subsequent SEM-based mediation models: Active in the World, Outdoor, and Exercise were significant mediators of the relationship between SES and Resilience. Of note, exercise was the strongest direct predictor for Resilience.

### Step 3: Full mediation models tested

We then developed a mediation model where the relationship between SES (step 1) and Resilience was mediated by the three Reserve-Building activities identified in step 2. An addition, the number of comorbidities was modeled as a covariate of Resilience. The penultimate model accounted for 19% of variance in Resilience but poorly fit the data ( $\chi^2=229.1$ ,  $df=36$ ,  $p<.01$ ;  $RMSEA=.110$ ,  $CFI=0.796$ ,  $TLI=0.689$ ; See Supplementary Table 2).

1 Review of modification indices and the correlation matrix in Table 3 suggested that the penultimate  
2 mediation model was not accounting for relationships between Personal Finance, as defined in the  
3 bifactor model, and Resilience. After adding the Personal Finance latent variable as a predictor of  
4 Resilience, the final mediation model accounted for 25% of the variance in Resilience and closely fit  
5 the data ( $\chi^2=47.4$ ,  $df=31$ ,  $p=.03$ ;  $RMSEA=.035$ ,  $CFI=0.983$ ,  $TLI=0.970$ ; See Table 4).  
6  
7  
8  
9  
10  
11  
12  
13  
14  
15  
16  
17  
18  
19  
20  
21  
22  
23  
24  
25  
26  
27  
28  
29  
30  
31  
32  
33  
34  
35  
36  
37  
38  
39  
40  
41  
42  
43  
44  
45  
46  
47  
48  
49  
50  
51  
52  
53  
54  
55  
56  
57  
58  
59  
60

| <b>Table 4. Final SEM Mediation Model Including Finance as a Predictor</b>                                |                                   |                      |           |          |                  |
|-----------------------------------------------------------------------------------------------------------|-----------------------------------|----------------------|-----------|----------|------------------|
|                                                                                                           | <b>Model</b>                      | <b>beta</b>          | <b>se</b> | <b>t</b> | <b>P value</b>   |
|                                                                                                           |                                   |                      |           |          |                  |
| Predicting reserve building                                                                               | SES -> Active in the world        | 0.33                 | 0.05      | 6.48     | <b>&lt;0.001</b> |
|                                                                                                           | SES -> Outdoor activities         | 0.14                 | 0.06      | 2.47     | <b>0.014</b>     |
|                                                                                                           | SES -> Exercise                   | 0.19                 | 0.05      | 3.55     | <b>&lt;0.001</b> |
|                                                                                                           | Finance -> Active in the world    | 0.26                 | 0.05      | 4.92     | <b>&lt;0.001</b> |
|                                                                                                           | Finance -> Outdoor activities     | 0.22                 | 0.06      | 4.07     | <b>&lt;0.001</b> |
|                                                                                                           | Finance -> Exercise               | 0.30                 | 0.05      | 6.03     | <b>&lt;0.001</b> |
| Predicting resilience: Direct effects                                                                     | SES -> Resilience                 | 0.04                 | 0.06      | 0.71     | 0.476            |
|                                                                                                           | Finance -> Resilience             | 0.31                 | 0.07      | 4.72     | <b>&lt;0.001</b> |
|                                                                                                           | Active in the world -> Resilience | 0.08                 | 0.05      | 1.57     | 0.116            |
|                                                                                                           | Outdoor activities -> Resilience  | 0.07                 | 0.05      | 1.37     | 0.170            |
|                                                                                                           | Exercise -> Resilience            | 0.10                 | 0.05      | 1.88     | 0.060            |
|                                                                                                           | Comorbid Conditions -> Resilience | -0.14                | 0.05      | -2.86    | <b>0.004</b>     |
| Predicting resilience: Total indirect effects                                                             | SES -> Resilience                 | 0.06                 | 0.02      | 2.65     | <b>0.008</b>     |
|                                                                                                           | Finance -> Resilience             | 0.13                 | 0.03      | 4.06     | <b>&lt;0.001</b> |
|                                                                                                           |                                   | <b>R<sup>2</sup></b> | <b>se</b> | <b>t</b> | <b>P value</b>   |
| R square                                                                                                  | Education                         | 0.78                 | 0.11      | 6.87     | <b>&lt;0.001</b> |
|                                                                                                           | Father Education                  | 0.59                 | 0.04      | 13.71    | <b>&lt;0.001</b> |
|                                                                                                           | Mother Education                  | 0.55                 | 0.04      | 13.00    | <b>&lt;0.001</b> |
|                                                                                                           | ONET                              | 0.46                 | 0.08      | 6.14     | <b>&lt;0.001</b> |
|                                                                                                           | INCOME                            | 0.63                 | 0.04      | 15.11    | <b>&lt;0.001</b> |
|                                                                                                           | Difficulty paying bills           | 0.58                 | 0.04      | 13.12    | <b>&lt;0.001</b> |
|                                                                                                           | Number of Conditions              | 0.20                 | 0.05      | 3.79     | <b>&lt;0.001</b> |
|                                                                                                           | Active in the world               | 0.18                 | 0.04      | 4.18     | <b>&lt;0.001</b> |
|                                                                                                           | Outdoor activities                | 0.07                 | 0.03      | 2.39     | <b>0.017</b>     |
|                                                                                                           | Exercise                          | 0.13                 | 0.04      | 3.64     | <b>&lt;0.001</b> |
|                                                                                                           | Resilience                        | 0.25                 | 0.05      | 5.54     | <b>&lt;0.001</b> |
| <b>Model Fit Statistics:</b> $\chi^2=47.4$ , $df=31$ , $p=.03$ ; $RMSEA=.035$ , $CFI=0.983$ , $TLI=0.970$ |                                   |                      |           |          |                  |
| Path coefficients are reflected by " -> "                                                                 |                                   |                      |           |          |                  |



1 As illustrated in Figure 2, the relationship between Resilience and both SES and Personal Finance is  
2 mediated by three Reserve-Building activities (Active in the World, Outdoor, and Exercise). In other  
3 words, the bivariate relationships (SES to Resilience) were significant until Reserve-Building activities  
4 were included in the model, and then the significant relationships were *only* from SES to Reserve-  
5 Building, but not the paths from Reserve-Building to Resilience. Further, the three specific Reserve-  
6 Building to Resilience paths have p-values are .00, .12, and .17, two of which are *nearly* significant or  
7 highly significant. The total mediation effect considers them as a whole collection, and taken together  
8 they do account for enough of the variance to create a total mediation effect.  
9

10 In addition, the Personal Finance to Resilience path is also mediated by the participant's number of  
11 comorbid conditions. As indicated in Table 4, there are significant total indirect effects from both  
12 General SES ( $b = 0.06, p < 0.01$ ) and Personal Finance ( $b = 0.13, p < 0.01$ ) to Resilience. This model  
13 supports the hypothesis that the relationship between General SES and Resilience is fully mediated  
14 by engaging in the three Reserve-Building activities. However, there is only partial mediation from  
15 Personal Finance to Resilience because of the remaining significant direct effect ( $b = 0.31, p < 0.01$ ).  
16 Higher levels of Personal Finance were also negatively associated with number of comorbidities, and  
17 those with more comorbidities generally had lower levels of Resilience.  
18

19 [FIGURE 2 NEAR HERE]

## 20 **Post-hoc Analyses**

21 Figures 3a-3c juxtapose the relationship between reserve-building and resilience and the mean level  
22 of each reserve-building activity, by SES-tertile group. Z-score transformations were used to compare  
23 the correlation coefficients, and analysis of variance was used to compare means by group (Type I  
24 error rate of 0.05). Figure 3a illustrates that the relationship between Active in the World and  
25 resilience is similar across SES groups ( $z=0.28, p=0.39$ ), but the mean level of these activities varied  
26 by SES group ( $F=7.20, df=2, p=0.001$ ). For Outdoor activities, the associations with resilience were  
27

not statistically significant ( $z=1.65$ ,  $p<0.10$ ), and the group means were not different from each other ( $F=1.30$ ,  $df=2$ ,  $p=0.27$ ). For Exercise, however, the medium and high SES groups showed a statistically significant difference in associations with resilience ( $z=2.10$ ,  $p<0.05$ ), and the group means were not different from each other ( $F=2.57$ ,  $df=2$ ,  $p=0.08$ ).

[FIGURES 3a-c NEAR HERE]

## Discussion

Our findings are consistent with the idea that the SES-Resilience link is mediated by the individual's engagement in Reserve-Building activities. Thus, people with higher SES tend to be more resilient in the face of chronic illness by dint of their regular practice of activities that stimulate them intellectually, culturally, and physically. In other words, people with higher SES may be more likely to spend their discretionary time engaging in reserve-building activities, and this practice makes them more resilient despite their chronic illness. The post-hoc analyses revealed that the association between reserve-building and resilience was similar across SES-tertile groups for Active in the World and Outdoor activities, but not for Exercise. For Exercise, medium-SES people who engaged in more exercise had more resilience, but this was not as strongly associated in the high-SES group. The high-SES group engaged in more Active in the World activities but similar levels of Outdoor and Exercise activities compared to the other SES-tertile groups. Our findings suggest that resilience is not determined by SES, but is modifiable if individuals can augment their practice of three types of reserve-building activities, such as attending lectures or concerts, participating in outdoor activities, and engaging in physical exercise. Choosing to engage in these three types of activities rather than other more passive, less stimulating activities appears to have a beneficial association with health.

A second finding of the present study is that Personal Finance had a direct effect on resilience: individuals with higher income and/or lower difficulty paying bills had higher resilience scores. Personal Finance also played a role in the relationship between number of comorbidities and

1 resilience: people with more financial resources tended to have fewer comorbidities, these financial  
2  
3 resources had a smaller protective effect in the context of multiple comorbidities. This finding may  
4  
5 reflect the fact that people with fewer financial resources are less likely to treat their comorbidities <sup>36</sup>.  
6  
7

8 Untreated comorbidities would likely reduce one's ability to be resilient to health challenges.  
9

10  
11 There has been an increasing interest in improving healthcare outcomes. In this context, 'social  
12  
13 determinants of health' are more often than not cast in terms of deficits or negative situations that  
14  
15 people encounter<sup>37 38</sup>. What is missing is addressing positive social determinants of health <sup>39 40</sup>, or  
16  
17 person factors that confer resilience, such as reserve-building activities. Our findings suggest that it  
18  
19 would be worthwhile to recommend the three types of activities associated with enhanced resilience.  
20  
21

22 Although exercise is standardly recommended to reduce mortality, our findings suggest that it is also  
23  
24 beneficial for conferring day-to-day resilience in the face of physical or mental health problems.  
25  
26

27 Further, other types of activities may confer similar benefits. Thus, there may be more options that  
28  
29 healthcare providers can offer to people that can help them achieve better resilience and that might fit  
30  
31 their lifestyle more easily, if exercise is not a viable option.  
32  
33

34 The present study has a notable strength in its large and heterogeneous sample, which is useful for  
35  
36 testing a complex hypothesis via SEM techniques. It included both income and difficulty paying bills in  
37  
38 the operationalization of General SES and Personal Finance, thus capturing complementary and  
39  
40 distinct aspects of financial well-being that are often not considered in tandem. The sample had  
41  
42 important variability in comorbidity burden, which allowed for evaluating the independent relationship  
43  
44 between comorbidity and resilience. The limitations of this study should, however, be noted. While the  
45  
46 sample is heterogeneous in its illness representation, it is predominantly comprised of middle-aged  
47  
48 white females who are married or living with family members. Thus, additional work is needed to  
49  
50 establish relationships with resilience across age, gender, race, and ethnicity groups. Indeed, age  
51  
52 and gender were not strongly related as shown in bivariate correlations and thus were not kept in our  
53  
54  
55  
56  
57  
58  
59  
60

1 SEM models. We are unable to quantify the response rate and thus to further identify the selection  
2 bias because we do not have access to information about who was invited to participate in the study  
3 and opted not to participate. The data are also cross-sectional, limiting our ability to test mediation  
4 effects with certainty or causal effects. Replication of our findings in longitudinal data is needed.  
5  
6 Finally, there are potential confounding factors, such as structural environmental factors, that were  
7 not addressed in the analysis. While it may be true that many of the reserve-building activities are  
8 free or inexpensive, that does not mean that they are equally accessible across SES groups. For  
9 example, people from lower SES backgrounds are often limited in their available free time (especially  
10 those who work more than one job) and in structural opportunities for activities like exercise (limited  
11 availability of green space, safe places to walk/run, access to gyms or sports facilities) and outdoor  
12 recreation. Cooking, shopping, and many cultural events also have associated costs. Even if  
13 cultural/intellectual events are free, they are often difficult to get to and people from low-SES  
14 backgrounds often have transportation barriers. Future research might address how to increase the  
15 perceived and real availability and opportunities for engaging in reserve-building activities among  
16 people with fewer SES resources and/or with more severe illness. For example, motivational  
17 interviewing techniques might be useful for addressing perceived barriers to different types of  
18 reserve-building activities (e.g., cultural activities, exercise, etc.), and helping patients to find  
19 inexpensive ways to get such activities into their lives.  
20  
21  
22  
23  
24  
25  
26  
27  
28  
29  
30  
31  
32  
33  
34  
35  
36  
37  
38  
39  
40  
41  
42  
43  
44

45 In summary, the present study provides suggestive evidence that reserve-building activities may be  
46 one pathway by which SES is associated with resilience: people of higher SES may be more likely to  
47 engage in reserve-building activities that are intellectually stimulating, involve outdoor pursuits, and  
48 include physical exercise. The implications of these findings may be useful for empowering patients to  
49 introduce more such reserve-building activities in their lives, and to replace more passive activities  
50  
51  
52  
53  
54  
55  
56  
57  
58  
59  
60

(e.g., television) with these active, salutogenic pursuits. Fundamentally, the reserve-building activities implicated in the present study are not costly to pursue (“the best things in life are free”). This critical accessibility and affordability has applications for public-health interventions to enhance resilience in healthy and chronically ill individuals. It is important to ensure that individuals from low SES backgrounds have opportunities for reserve-building activities.

### Acknowledgements

We are grateful to the patients who participated in this study.

### Funding details

This work was unfunded by any external agency.

### Disclosures

All authors declare that they have no potential conflicts of interest and report no disclosures.

### Data sharing statement

No additional data available.

### Data deposition

Not applicable.

### References

1. Hartman M, Martin AB, Espinosa N, et al. National Health Care Spending In 2016: Spending And Enrollment Growth Slow After Initial Coverage Expansions. *Health Affairs* 2017
2. Adler NE. Health disparities through a psychological lens. *American Psychologist* 2009;64(8):663.
3. Chetty R, Stepner M, Abraham S, et al. The association between income and life expectancy in the United States, 2001-2014. *Jama* 2016;315(16):1750-66.
4. Cundiff JM, Matthews KA. Is subjective social status a unique correlate of physical health? A meta-analysis. *Health Psychology* 2017;36(12):1109.
5. Cundiff JM, Smith TW. Social status, everyday interpersonal processes, and coronary heart disease: A social psychophysiological view. *Social and Personality Psychology Compass* 2017;11(4)

- 1  
2 6. Schwartz CE, Quaranto BR, Healy BC, et al. Cognitive reserve and symptom experience in  
3  
4 multiple sclerosis: a buffer to disability progression over time? *Archives of physical medicine and*  
5  
6 *rehabilitation* 2013;94(10):1971-81. doi: 10.1016/j.apmr.2013.05.009  
7
- 8  
9 7. Stern Y, Gurland B, Tatemichi TK, et al. Influence of education and occupation on the incidence of  
10  
11 Alzheimer's disease. *Journal of the American Medical Association* 1994;271(13):1004-10.  
12  
13 [published Online First: 1994/04/06]  
14
- 15  
16 8. Pernecky R, Drzezga A, Boecker H, et al. Activities of daily living, cerebral glucose metabolism,  
17  
18 and cognitive reserve in Lewy body and Parkinson's disease. *Dementia and Geriatric Cognitive*  
19  
20 *Disorders* 2008;26(5):475-81.  
21
- 22  
23 9. Ahles TA, Saykin AJ, McDonald BC, et al. Longitudinal assessment of cognitive changes  
24  
25 associated with adjuvant treatment for breast cancer: Impact of age and cognitive reserve *Journal*  
26  
27 *of Clinical Oncology* 2010;28(29):4434-40.  
28
- 29  
30 10. Schwartz CE, Rapkin BD, Healy BC. Reserve and Reserve-Building Activities Research: Key  
31  
32 challenges and future directions. *BMC Neuroscience* 2016;17:62. doi: 10.1186/s12868-016-0297-  
33  
34 0  
35
- 36  
37 11. Schwartz CE, Snook EM, Quaranto BR, et al. Cognitive reserve and patient-reported outcomes.  
38  
39 *Multiple Sclerosis Journal* 2013;19(1):87-105. doi: 10.1177/1352458512444914 [published Online  
40  
41 First: May 1]  
42
- 43  
44 12. Gardner H. Multiple intelligences: New horizons: Basic books 2006.  
45
- 46  
47 13. Aguiar AS, Jr., Castro AA, Moreira EL, et al. Short bouts of mild-intensity physical exercise  
48  
49 improve spatial learning and memory in aging rats: involvement of hippocampal plasticity via AKT,  
50  
51 CREB and BDNF signaling. *Mech Ageing Dev* 2011;132(11-12):560-7. doi:  
52  
53 10.1016/j.mad.2011.09.005 [published Online First: 2011/10/11]  
54  
55  
56  
57  
58  
59  
60

14. Barulli D, Stern Y. Efficiency capacity, compensation, maintenance, plasticity: emerging concepts in cognitive reserve. *Trends in Cognitive Sciences* 2013;17(10):502-09. doi: 10.1016/j.tics.2013.08.012 [published Online First: October 2013]
15. Cotman CW, Berchtold NC. Exercise: a behavioral intervention to enhance brain health and plasticity. *Trends Neurosci* 2002;25(6):295-301. [published Online First: 2002/06/28]
16. Lovden M, Wenger E, Martensson J, et al. Structural brain plasticity in adult learning and development. *Neuroscience & Biobehavioral Reviews* 2013;37(9, Part B):2296-310.
17. Schwartz CE, Peng CK, Lester N, et al. Self-reported coping behavior in health and disease: assessment with a card sort game. *Behav Med* 1998;24(1):41-44.
18. Schwartz CE, Snook E, Quaranto B, et al. Cognitive reserve and appraisal in multiple sclerosis. *Multiple Sclerosis and Related Disorders* 2013;2(1):36-44. doi: 10.1016/j.msard.2012.07.006 [published Online First: January 2013]
19. Dillman DA, Smyth JD, Christian LM. Internet, phone, mail, and mixed-mode surveys: The Tailored Design Method. Fourth ed. Hoboken, NJ: John Wiley & Sons, Inc. 2014.
20. Schwartz CE, Michael W, Zhang J, et al. Assessing reserve-building pursuits and person characteristics: Psychometric validation of the DeltaQuest Reserve-Building Measure. *Quality of Life Research* 2018;27:423-36. doi: 10.1007/s11136-017-1694-2
21. Tsacoumis S, Willison S. O\*NET Analyst Occupational Skill Ratings: Procedures. In: Organization HRR, ed. Raleigh, NC: National Center for O\*NET Development, 2010.
22. Hanmer J, Cherepanov D. A single question about a respondent's perceived financial ability to pay monthly bills explains more variance in health utility scores than absolute income and assets questions. *Quality of Life Research* 2016;25(9):2233-37.
23. Measuring healthy days: Population assessment of health-related quality of life. Atlanta, GA: Centers for Disease Control and Prevention 2000.

24. Schwartz CE, Michael W, Rapkin BD. Resilience to health challenges is related to different ways of thinking: mediators of physical and emotional quality of life in a heterogeneous rare-disease cohort. *Quality of Life Research* 2017;26(11):3075-88.
25. Sangha O, Stucki G, Liang MH, et al. The self-administered comorbidity questionnaire: A new method to assess comorbidity for clinical and health services research. *Arthritis Care & Research* 2003;49(2):156-63.
26. Reed BR, Mungas D, Farias ST, et al. Measuring cognitive reserve based on the decomposition of episodic memory variance. *Brain : a journal of neurology* 2010;133(Pt 8):2196-209. doi: 10.1093/brain/awq154
27. Rapkin BD, Schwartz CE. Toward a theoretical model of quality-of-life appraisal: Implications of findings from studies of response shift. *Health and Quality of Life Outcomes* 2004;2(1):14.
28. Bochner B, Schwartz CE, Garcia I, et al. Understanding the impact of radical cystectomy and urinary diversion in patients with bladder cancer: treatment outcomes clarified by appraisal process. *Quality of Life Research* 2017;26(Suppl 1):6.
29. Holzinger KJ, Swineford F. The bi-factor method. *Psychometrika* 1937;2:41-54.
30. Gibbons RD, Hedeker DR. Full-information item bifactor analysis. *Psychometrika* 1992;57:423-36.
31. Hu LT, Bentler PM. Cutoff criteria for fit indexes in covariance structure analysis: Conventional criteria versus new alternatives. *Structural Equation Modeling-a Multidisciplinary Journal* 1999;6(1):1-55. doi: 10.1080/10705519909540118
32. Browne MW, Cudeck R. Alternative ways of assessing model fit. In: Bollen KA, Long JS, eds. *Testing structural equation models*. Newbury Park, CA: Sage Publications 1993.
33. Stata Statistical Software: Release 15 [program]. College Station, TX: StataCorp LLC, 2017.
34. IBM SPSS Statistics for Windows [program]. 24.0 version. Armonk, NY: IBM Corp., 2016.
35. Cohen J. A power primer. *Psychological Bulletin* 1992;112:155-59.



- 1 36. What role do person factors play in modifying the impact of treatment burden in chronic illness?  
2  
3  
4 Quality of Life Research; 2017.  
5
- 6 37. Capturing Social and Behavioral Domains and Measures in Electronic Health Records [Available  
7  
8 from: [http://www.nap.edu/catalog/18709/capturing-social-and-behavioral-domains-in-electronic-](http://www.nap.edu/catalog/18709/capturing-social-and-behavioral-domains-in-electronic-health-records-phase)  
9  
10 [health-records-phase](http://www.nap.edu/catalog/18709/capturing-social-and-behavioral-domains-in-electronic-health-records-phase) accessed June 21, 2016 2016.  
11  
12
- 13 38. Gitterman BA, Flanagan PJ, Cotton WH, et al. Poverty and child health in the United States.  
14  
15 *Pediatrics* 2016:peds. 2016-0339.  
16
- 17 39. Garg A, Boynton-Jarrett R, Dworkin PH. Avoiding the unintended consequences of screening for  
18  
19 social determinants of health. *Jama* 2016;316(8):813-14.  
20  
21
- 22 40. Adler NE, Cutler DM, Jonathan J, et al. Addressing Social Determinants of Health and Health  
23  
24 Disparities: Discussion Paper, Vital Directions for Health and Health Care Series. National  
25  
26 Academy of Medicine, Washington, DC. [https://nam.](https://nam.edu/wp-content/uploads/2016/09/addressing-social-determinantsof-health-and-health-disparities.pdf) edu/wp-content/uploads/2016/09/addressing-  
27  
28 social-determinantsof-health-and-health-disparities. pdf, 2016.  
29  
30  
31  
32  
33  
34  
35  
36  
37  
38  
39  
40  
41  
42  
43  
44  
45  
46  
47  
48  
49  
50  
51  
52  
53  
54  
55  
56  
57  
58  
59  
60

## Figure Legends

**Figure 1. Theoretical Model Being Tested.** It was hypothesized that Reserve-Building activities would mediate the relationship between SES and Resilience. Thus, the direct effect from SES to Resilience would be partially or fully attenuated through both variables' relationship with Reserve-Building (the mediator).

**Figure 2. The Full Mediation Model.** Reserve-building activities mediate the relationships between Resilience and both SES and Personal Finance. The relevant Reserve-Building activities are Active in the World, Outdoor, and Exercise. The Personal Finance to Resilience path is also mediated by the participant's number of comorbid conditions. As indicated in Table 4, there are significant total indirect effects from both General SES ( $b = 0.06, p < 0.01$ ) and Personal Finance ( $b = 0.13, p < 0.01$ ) to Resilience. This model supports the hypothesis that the relationship between General SES and Resilience is mediated by engaging in the three Reserve-Building activities. Bold values indicate significant paths ( $p < .05$ ).

**Figures 3a-3c. The Relationship Between Reserve-Building and Resilience.** Correlation coefficients between the reserve-building activity and resilience are displayed as bar charts, with the left axis showing units. The mean values by SES tertile are displayed as line graphs, with the right axis showing units. The relationship between Active in the World and resilience is similar across SES groups, but the mean level of these activities varied by SES group (Figure 3a). For Outdoor activities, the associations with resilience and the group means were not different from each other (Figure 3b). For Exercise, however, the medium and high SES groups showed a statistically significant difference in associations with resilience, and the group means were not different from each other (Figure 3c).

**Supplementary Figure 1. The Bifactor Model of SES.** SES was modeled as a bifactor model with the general factor comprised of respondent's education, father's education, mother's education, occupational complexity, income tertile, and endorsed difficulty paying bills.

Figure 1. Theoretical model being tested

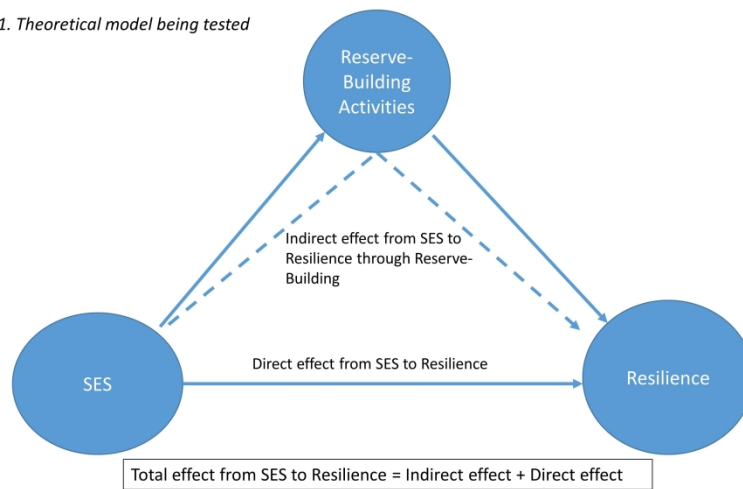

Figure 1. Theoretical Model Being Tested. It was hypothesized that Reserve-Building activities would mediate the relationship between SES and Resilience. Thus, the direct effect from SES to Resilience would be partially or fully attenuated through both variables' relationship with Reserve-Building (the mediator).

338x190mm (300 x 300 DPI)

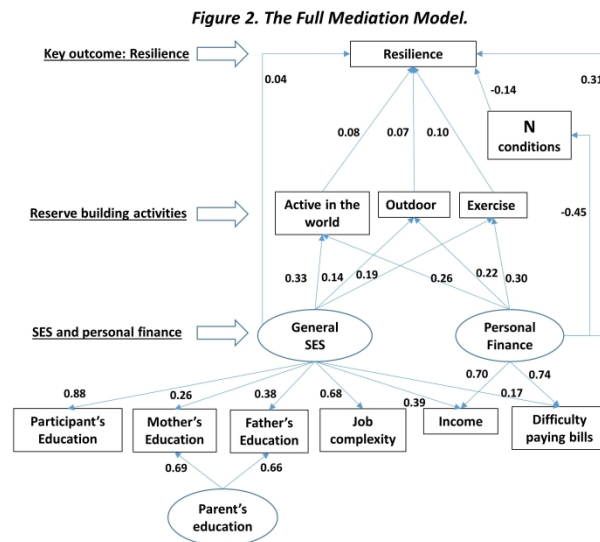

Figure 2. The Full Mediation Model. Reserve-building activities mediate the relationships between Resilience and both SES and Personal Finance. The relevant Reserve-Building activities are Active in the World, Outdoor, and Exercise. The Personal Finance to Resilience path is also mediated by the participant's number of comorbid conditions. As indicated in Table 4, there are significant total indirect effects from both General SES ( $b = 0.06$ ,  $p < 0.01$ ) and Personal Finance ( $b = 0.13$ ,  $p < 0.01$ ) to Resilience. This model supports the hypothesis that the relationship between General SES and Resilience is mediated by engaging in the three Reserve-Building activities. Bold values indicate significant paths ( $p < .05$ ).

338x190mm (300 x 300 DPI)

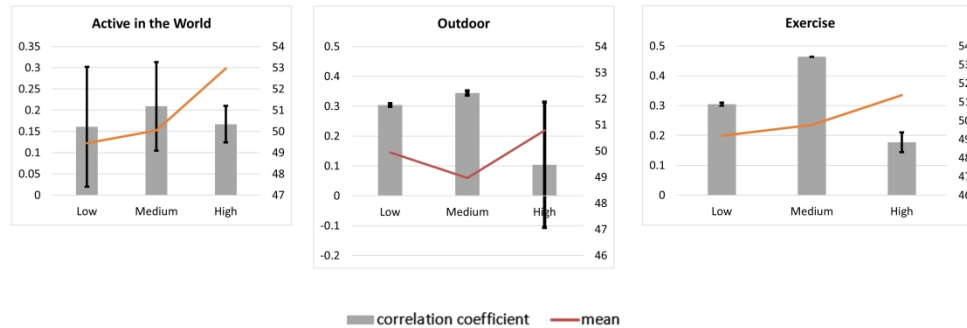

Figures 3a-3c. The Relationship Between Reserve-Building and Resilience. Correlation coefficients between the reserve-building activity and resilience are displayed as bar charts, with the left axis showing units. The mean values by SES tertile are displayed as line graphs, with the right axis showing units. The relationship between Active in the World and resilience is similar across SES groups, but the mean level of these activities varied by SES group (Figure 3a). For Outdoor activities, the associations with resilience and the group means were not different from each other (Figure 3b). For Exercise, however, the medium and high SES groups showed a statistically significant difference in associations with resilience, and the group means were not different from each other (Figure 3c).

338x190mm (300 x 300 DPI)

Supplementary Figure 1. The Bifactor Model of SES

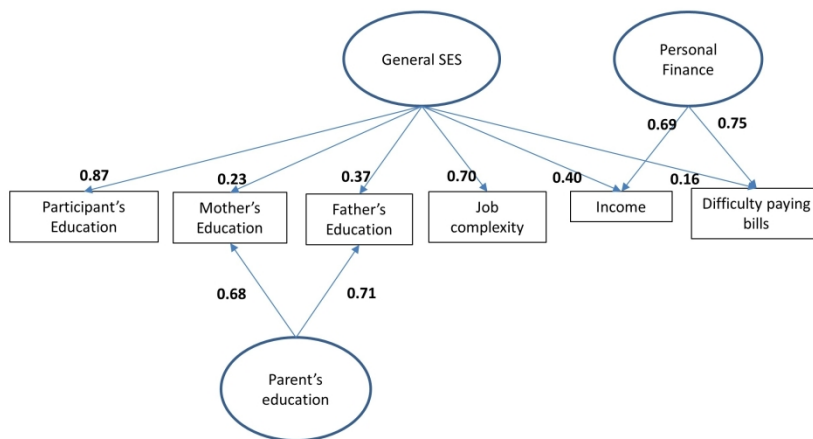

Supplementary Figure 1. The Bifactor Model of SES. SES was modeled as a bifactor model with the general factor comprised of respondent's education, father's education, mother's education, occupational complexity, income tertile, and endorsed difficulty paying bills.

254x190mm (300 x 300 DPI)

| Supplementary Table 1. Results of Simple Mediation Models |                |
|-----------------------------------------------------------|----------------|
|                                                           | Direct Effects |
| Model                                                     | Estimate       |
| SES -> Active in the world                                | 0.41 ***       |
| SES -> Resilience                                         | 0.14 *         |
| Active in the world -> Resilience                         | 0.19 ***       |
| Indirect effect                                           | 0.08 ***       |
| SES -> Games                                              | 0.05           |
| SES -> Resilience                                         | 0.20 ***       |
| Games -> Resilience                                       | -0.06          |
| Indirect effect                                           | 0.00           |
| SES -> Outdoor                                            | 0.20 ***       |
| SES -> Resilience                                         | 0.16 ***       |
| Outdoor -> Resilience                                     | 0.20 ***       |
| Indirect effect                                           | 0.04 **        |
| SES -> Creative                                           | 0.11           |
| SES -> Resilience                                         | 0.19 ***       |
| Creative -> Resilience                                    | 0.05           |
| Indirect effect                                           | 0.01           |
| SES -> Religious / Spiritual                              | 0.04           |
| SES -> Resilience                                         | 0.19 ***       |
| Religious / Spiritual -> Resilience                       | 0.07           |
| Indirect effect                                           | 0.00           |
| SES -> Exercise                                           | 0.29 ***       |
| SES -> Resilience                                         | 0.15 **        |
| Exercise -> Resilience                                    | 0.24 ***       |
| Indirect effect                                           | 0.07 *         |
| SES -> Passive Media Consumption                          | -0.17 ***      |
| SES -> Resilience                                         | 0.18 ***       |
| Passive Media Consumption -> Resilience                   | -0.06          |
| Indirect effect                                           | 0.01           |
| SES -> Shopping / Cooking                                 | -0.06          |
| SES -> Resilience                                         | 0.20 ***       |
| Shopping / Cooking -> Resilience                          | 0.14 ***       |
| Indirect effect                                           | -0.01          |
| SES -> Inner life                                         | 0.23 ***       |
| SES -> Resilience                                         | 0.20 ***       |
| Inner life -> Resilience                                  | -0.01          |
| Indirect effect                                           | 0.00           |

† p<0.10; \* p<0.05; \*\* p<0.01; \*\*\* p<0.001

| <b>Supplementary Table 2. Penultimate SEM Mediation Model Without Including Finance as a Predictor</b> |                                        |                      |           |                  |                  |
|--------------------------------------------------------------------------------------------------------|----------------------------------------|----------------------|-----------|------------------|------------------|
| <b>Model</b>                                                                                           |                                        | <b>beta</b>          | <b>se</b> | <b>t</b>         | <b>P value</b>   |
| Predicting reserve building                                                                            | SES -> Active in the world             | 0.40                 | 0.05      | 7.66             | <b>&lt;0.001</b> |
|                                                                                                        | SES -> Outdoor activities              | 0.20                 | 0.06      | 3.42             | <b>0.001</b>     |
|                                                                                                        | SES -> Exercise                        | 0.27                 | 0.05      | 4.93             | <b>&lt;0.001</b> |
| Predicting resilience: Direct effects                                                                  | SES -> Resilience                      | 0.05                 | 0.06      | 0.86             | 0.389            |
|                                                                                                        | Active in the world -> Resilience      | 0.12                 | 0.05      | 2.41             | 0.016            |
|                                                                                                        | Outdoor activities -> Resilience       | 0.10                 | 0.05      | 2.25             | 0.024            |
|                                                                                                        | Exercise -> Resilience                 | 0.13                 | 0.05      | 2.77             | 0.006            |
|                                                                                                        | Comorbid Conditions -> Resilience      | -0.31                | 0.04      | -7.11            | <b>&lt;0.001</b> |
| Predicting resilience: Total indirect effects                                                          | SES -> Resilience                      | 0.11                 | 0.03      | 3.79             | <b>&lt;0.001</b> |
|                                                                                                        | SES-> Active in the world-> Resilience | 0.05                 | 0.02      | 2.25             | <b>0.025</b>     |
| Predicting resilience: Specific Indirect effects                                                       | SES-> Outdoor activities-> Resilience  | 0.02                 | 0.01      | 1.87             | 0.061            |
|                                                                                                        | SES-> Exercise-> Resilience            | 0.035                | 0.015     | 2.308            | <b>0.021</b>     |
|                                                                                                        |                                        | <b>R<sup>2</sup></b> | <b>se</b> | <b>t</b>         | <b>P value</b>   |
| R square                                                                                               | Education                              | 0.60                 | 0.08      | 7.81             | <b>&lt;0.001</b> |
|                                                                                                        | Father Education                       | 0.58                 | 0.04      | 13.92            | <b>&lt;0.001</b> |
|                                                                                                        | Mother Education                       | 0.55                 | 0.04      | 13.17            | <b>&lt;0.001</b> |
|                                                                                                        | ONET                                   | 0.50                 | 0.07      | 7.05             | <b>&lt;0.001</b> |
|                                                                                                        | INCOME                                 | 0.59                 | 0.05      | 12.57            | <b>&lt;0.001</b> |
|                                                                                                        | Difficulty paying bills                | 0.51                 | 0.05      | 10.34            | <b>&lt;0.001</b> |
|                                                                                                        | Active in the world                    | 0.16                 | 0.04      | 3.83             | <b>&lt;0.001</b> |
|                                                                                                        | Outdoor activities                     | 0.04                 | 0.02      | 1.71             | <b>0.087</b>     |
|                                                                                                        | Exercise                               | 0.07                 | 0.03      | 2.46             | <b>0.014</b>     |
| Resilience                                                                                             | 0.19                                   | 0.04                 | 5.29      | <b>&lt;0.001</b> |                  |

**Model Fit Statistics:**  $\chi^2=229.1$ ,  $df=36$ ,  $p<.01$ ;  $RMSEA=.110$ ,  $CFI=0.796$ ,  $TLI=0.689$

Path coefficients are reflected by " -> "



**STROBE 2007 (v4) checklist of items to be included in reports of observational studies in epidemiology\***  
**Checklist for cohort, case-control, and cross-sectional studies (combined)**

| Section/Topic             | Item # | Recommendation                                                                                                                                                                                                                                                                                                                                                                                                                                                         | Reported on page #     |
|---------------------------|--------|------------------------------------------------------------------------------------------------------------------------------------------------------------------------------------------------------------------------------------------------------------------------------------------------------------------------------------------------------------------------------------------------------------------------------------------------------------------------|------------------------|
| Title and abstract        | 1      | (a) Indicate the study's design with a commonly used term in the title or the abstract                                                                                                                                                                                                                                                                                                                                                                                 | 1                      |
|                           |        | (b) Provide in the abstract an informative and balanced summary of what was done and what was found                                                                                                                                                                                                                                                                                                                                                                    | 3                      |
| <b>Introduction</b>       |        |                                                                                                                                                                                                                                                                                                                                                                                                                                                                        |                        |
| Background/rationale      | 2      | Explain the scientific background and rationale for the investigation being reported                                                                                                                                                                                                                                                                                                                                                                                   | 6                      |
| Objectives                | 3      | State specific objectives, including any pre-specified hypotheses                                                                                                                                                                                                                                                                                                                                                                                                      | 6                      |
| <b>Methods</b>            |        |                                                                                                                                                                                                                                                                                                                                                                                                                                                                        |                        |
| Study design              | 4      | Present key elements of study design early in the paper                                                                                                                                                                                                                                                                                                                                                                                                                | 7                      |
| Setting                   | 5      | Describe the setting, locations, and relevant dates, including periods of recruitment, exposure, follow-up, and data collection                                                                                                                                                                                                                                                                                                                                        | 7                      |
| Participants              | 6      | (a) <i>Cohort study</i> —Give the eligibility criteria, and the sources and methods of selection of participants. Describe methods of follow-up<br><i>Case-control study</i> —Give the eligibility criteria, and the sources and methods of case ascertainment and control selection. Give the rationale for the choice of cases and controls<br><i>Cross-sectional study</i> —Give the eligibility criteria, and the sources and methods of selection of participants | 7                      |
|                           |        | (b) <i>Cohort study</i> —For matched studies, give matching criteria and number of exposed and unexposed<br><i>Case-control study</i> —For matched studies, give matching criteria and the number of controls per case                                                                                                                                                                                                                                                 | NA                     |
| Variables                 | 7      | Clearly define all outcomes, exposures, predictors, potential confounders, and effect modifiers. Give diagnostic criteria, if applicable                                                                                                                                                                                                                                                                                                                               | 8                      |
| Data sources/ measurement | 8*     | For each variable of interest, give sources of data and details of methods of assessment (measurement). Describe comparability of assessment methods if there is more than one group                                                                                                                                                                                                                                                                                   | 8                      |
| Bias                      | 9      | Describe any efforts to address potential sources of bias                                                                                                                                                                                                                                                                                                                                                                                                              | 11-12                  |
| Study size                | 10     | Explain how the study size was arrived at                                                                                                                                                                                                                                                                                                                                                                                                                              | 7                      |
| Quantitative variables    | 11     | Explain how quantitative variables were handled in the analyses. If applicable, describe which groupings were chosen and why                                                                                                                                                                                                                                                                                                                                           | 9-10                   |
| Statistical methods       | 12     | (a) Describe all statistical methods, including those used to control for confounding                                                                                                                                                                                                                                                                                                                                                                                  | 9-10, Supp. Tables 1,2 |
|                           |        | (b) Describe any methods used to examine subgroups and interactions                                                                                                                                                                                                                                                                                                                                                                                                    | NA                     |
|                           |        | (c) Explain how missing data were addressed                                                                                                                                                                                                                                                                                                                                                                                                                            | NA                     |
|                           |        | (d) <i>Cohort study</i> —If applicable, explain how loss to follow-up was addressed<br><i>Case-control study</i> —If applicable, explain how matching of cases and controls was addressed                                                                                                                                                                                                                                                                              | NA                     |

|                          |     |                                                                                                                                                                                                              |                                       |
|--------------------------|-----|--------------------------------------------------------------------------------------------------------------------------------------------------------------------------------------------------------------|---------------------------------------|
|                          |     | <i>Cross-sectional study</i> —If applicable, describe analytical methods taking account of sampling strategy                                                                                                 |                                       |
|                          |     | (e) Describe any sensitivity analyses                                                                                                                                                                        | NA                                    |
| <b>Results</b>           |     |                                                                                                                                                                                                              |                                       |
| Participants             | 13* | (a) Report numbers of individuals at each stage of study—eg numbers potentially eligible, examined for eligibility, confirmed eligible, included in the study, completing follow-up, and analysed            | NA                                    |
|                          |     | (b) Give reasons for non-participation at each stage                                                                                                                                                         | NA                                    |
|                          |     | (c) Consider use of a flow diagram                                                                                                                                                                           | NA                                    |
| Descriptive data         | 14* | (a) Give characteristics of study participants (eg demographic, clinical, social) and information on exposures and potential confounders                                                                     | 10                                    |
|                          |     | (b) Indicate number of participants with missing data for each variable of interest                                                                                                                          | Tables 1,2                            |
|                          |     | (c) <i>Cohort study</i> —Summarise follow-up time (eg, average and total amount)                                                                                                                             | NA                                    |
| Outcome data             | 15* | <i>Cohort study</i> —Report numbers of outcome events or summary measures over time                                                                                                                          |                                       |
|                          |     | <i>Case-control study</i> —Report numbers in each exposure category, or summary measures of exposure                                                                                                         |                                       |
|                          |     | <i>Cross-sectional study</i> —Report numbers of outcome events or summary measures                                                                                                                           | Table 2                               |
| Main results             | 16  | (a) Give unadjusted estimates and, if applicable, confounder-adjusted estimates and their precision (eg, 95% confidence interval). Make clear which confounders were adjusted for and why they were included | 11-13, Tables 3, 4, Supp. Tables 1, 2 |
|                          |     | (b) Report category boundaries when continuous variables were categorized                                                                                                                                    | NA                                    |
|                          |     | (c) If relevant, consider translating estimates of relative risk into absolute risk for a meaningful time period                                                                                             | NA                                    |
| Other analyses           | 17  | Report other analyses done—eg analyses of subgroups and interactions, and sensitivity analyses                                                                                                               | Tables 3, 4, Supp. Tables 1, 2        |
| <b>Discussion</b>        |     |                                                                                                                                                                                                              |                                       |
| Key results              | 18  | Summarise key results with reference to study objectives                                                                                                                                                     | 14-16                                 |
| Limitations              | 19  | Discuss limitations of the study, taking into account sources of potential bias or imprecision. Discuss both direction and magnitude of any potential bias                                                   | 5, 15                                 |
| Interpretation           | 20  | Give a cautious overall interpretation of results considering objectives, limitations, multiplicity of analyses, results from similar studies, and other relevant evidence                                   | 14-16                                 |
| Generalisability         | 21  | Discuss the generalisability (external validity) of the study results                                                                                                                                        | 15                                    |
| <b>Other information</b> |     |                                                                                                                                                                                                              |                                       |
| Funding                  | 22  | Give the source of funding and the role of the funders for the present study and, if applicable, for the original study on which the present article is based                                                | 16                                    |

\*Give information separately for cases and controls in case-control studies and, if applicable, for exposed and unexposed groups in cohort and cross-sectional studies.

1  
2  
3  
4  
5  
6  
7  
8  
9  
10  
11  
12  
13  
14  
15  
16  
17  
18  
19  
20  
21  
22  
23  
24  
25  
26  
27  
28  
29  
30  
31  
32  
33  
34  
35  
36  
37  
38  
39  
40  
41  
42  
43  
44  
45  
46  
47

**Note:** An Explanation and Elaboration article discusses each checklist item and gives methodological background and published examples of transparent reporting. The STROBE checklist is best used in conjunction with this article (freely available on the Web sites of PLoS Medicine at <http://www.plosmedicine.org/>, Annals of Internal Medicine at <http://www.annals.org/>, and Epidemiology at <http://www.epidem.com/>). Information on the STROBE Initiative is available at [www.strobe-statement.org](http://www.strobe-statement.org).

For peer review only

# BMJ Open

**Is the link between socioeconomic status and resilience mediated by reserve-building activities?  
Mediation analysis of web-based cross-sectional data from chronic medical illness patient panels**

|                                 |                                                                                                                                                                                                                                                                                                                                                       |
|---------------------------------|-------------------------------------------------------------------------------------------------------------------------------------------------------------------------------------------------------------------------------------------------------------------------------------------------------------------------------------------------------|
| Journal:                        | <i>BMJ Open</i>                                                                                                                                                                                                                                                                                                                                       |
| Manuscript ID                   | bmjopen-2018-025602.R2                                                                                                                                                                                                                                                                                                                                |
| Article Type:                   | Research                                                                                                                                                                                                                                                                                                                                              |
| Date Submitted by the Author:   | 06-Feb-2019                                                                                                                                                                                                                                                                                                                                           |
| Complete List of Authors:       | Schwartz, Carolyn; DeltaQuest Foundation, Inc., ; Tufts University School of Medicine, Medicine & Orthopaedic Surgery<br>Zhang, Jie; DeltaQuest Foundation, Inc.<br>Stucky, Brian; Los Alamos National Laboratory<br>Michael, Wesley; Rare Patient Voice, LLC<br>Rapkin, Bruce; Albert Einstein College of Medicine, Epidemiology & Population Health |
| <b>Primary Subject Heading</b>: | Public health                                                                                                                                                                                                                                                                                                                                         |
| Secondary Subject Heading:      | Patient-centred medicine                                                                                                                                                                                                                                                                                                                              |
| Keywords:                       | cognitive reserve, socioeconomic status, social determinants of health, resilience, chronic illness                                                                                                                                                                                                                                                   |
|                                 |                                                                                                                                                                                                                                                                                                                                                       |

SCHOLARONE™  
Manuscripts

1  
2  
3  
4 Is the link between socioeconomic status and resilience mediated by reserve-building activities?

5  
6 Mediation analysis of web-based cross-sectional data from chronic medical illness patient panels  
7  
8  
9

10  
11 Carolyn E. Schwartz, Sc.D.<sup>1,2\*</sup>, Jie Zhang, M.P.H.<sup>1</sup>, Brian D. Stucky, Ph.D.<sup>3</sup>, Wesley Michael, M.B.A.<sup>4</sup>,  
12  
13 Bruce D. Rapkin, Ph.D.<sup>5</sup>  
14

15  
16 1 DeltaQuest Foundation, Inc., Concord, MA, USA

17  
18 2 Departments of Medicine and Orthopaedic Surgery, Tufts University Medical School, Boston,  
19  
20 MA, USA  
21

22  
23 3 Los Alamos National Laboratory, Santa Fe, NM, USA  
24

25  
26 4 Rare Patient Voice, LLC, Towson, MD, USA

27  
28 5 Department of Epidemiology and Population Health, Division of Community Collaboration &  
29  
30 Implementation Science, Albert Einstein College of Medicine, Bronx, NY, USA  
31

32 **Corresponding author:**  
33

34 Carolyn Schwartz, Sc.D., DeltaQuest Foundation, Inc.  
35

36  
37 31 Mitchell Road  
38

39  
40 Concord, MA 01742  
41

42  
43 Phone 978 318 7914  
44

45  
46 [carolyn.schwartz@deltaquest.org](mailto:carolyn.schwartz@deltaquest.org)  
47

48 **Word Count:** 3,720  
49  
50  
51  
52  
53  
54  
55  
56  
57  
58  
59  
60

**Author Contributorship Statement:**

*Conceptualize and designed study:* CES, BDS, BDR

*Access to sample:* WM

*Data collection:* CES, JZ, WM

*Data Analysis:* CES, JZ, BDS, BDR

*Interpretation of findings:* CES, JZ, BDS, BDR

*Manuscript writing/editing:* CES, JZ, WM, BDS, BDR

## Abstract

**Objectives:** The purpose of this study is to test the hypothesis that the link between socioeconomic status (SES) and resilience is mediated by reserve-building activities.

**Design:** Cross-sectional observational study. Structural equation modeling (SEM) was used to test the mediation hypothesis.

**Setting:** Web-based survey

**Participants:** Participants with a chronic medical condition were recruited from Rare Patient Voice, LLC

**Primary and Secondary Outcome Measures:** DeltaQuest Reserve-Building Measure; demographic variables to capture SES; Centers for Disease Control Healthy Days Core Module; Self-Administered Comorbidity Questionnaire. Resilience was operationalized using residual modeling.

**Results:** The study sample included 442 patients (mean age 49, 85% female). SES was modeled as a bifactor model comprised of General SES and specific factors for Personal Finance and Parent's Education. A series of simple mediation models predicting Resilience led to the selection of three Reserve-Building activities for subsequent SEM-based mediation models: Active in the World, Outdoor, and Exercise. The full SEM model supported the hypothesis that the relationships from both General SES and Personal Finance to Resilience were mediated by engaging in the three Reserve-Building activities. In addition, number of comorbidities partially mediated the relationship between Personal Finance and Reserve-Building. Those with more comorbidities generally had lower levels of Resilience.

**Conclusions:** This study provides suggestive evidence that reserve-building activities may be one pathway by which SES is associated with resilience: people of higher SES are more likely to engage in reserve-building activities that are intellectually stimulating, involve outdoor pursuits, and include

1 physical exercise. These reserve-building activities are not costly to pursue. These findings may  
2  
3 empower patients to introduce more such reserve-building activities into their lives.  
4

5  
6 **Key Words:** cognitive reserve; socioeconomic status; social determinants of health; resilience,  
7  
8 chronic illness  
9

10  
11  
12  
13  
14  
15  
16  
17  
18  
19  
20  
21  
22  
23  
24  
25  
26  
27  
28  
29  
30  
31  
32  
33  
34  
35  
36  
37  
38  
39  
40  
41  
42  
43  
44  
45  
46  
47  
48  
49  
50  
51  
52  
53  
54  
55  
56  
57  
58  
59  
60

For peer review only



## Article Summary

### Strengths of this study

- The study uses a more comprehensive measure of reserve-building activities than previously used in past research.
- The study sample is robust (n=442 people with chronic illness), enabling the use of structural equation modeling to test the following mediation hypothesis: Reserve-building activities mediate the relationship between socioeconomic status and resilience.

### Limitations of this study

- While the sample is heterogeneous in its illness representation, it is predominantly comprised of middle-aged white females who are married or living with family members.
- The data are also cross-sectional, limiting our ability to test mediation effects with certainty or causal effects.
- There are potential confounding factors, such as structural environmental factors, that were not addressed in the analysis. For example, while it may be true that many of the reserve-building activities are free or inexpensive, that does not mean that they are equally accessible across the SES continuum.

## Introduction

Substantial health disparities exist in the United States, despite 18% of the gross national product expenditures being on health care<sup>1</sup>. A large literature has documented the relationship between socioeconomic status (SES) on morbidity and mortality<sup>2,3</sup>, and has shown that this relationship does not simply reflect the effects of poverty<sup>4</sup>. This SES-morbidity relationship is similar across income groups, extending beyond poverty to explain relative differences in health among higher SES groups as well<sup>2,4</sup>. The SES-health connection may relate to patterns of social behavior and interpersonal experiences that either promote disease or protect against it<sup>4,5</sup>.

Recent work on the concept of reserve and reserve-building activities may provide a useful mechanism by which (high) SES buffers health. Building on observational work in patient populations with neurological disease, a substantial body of research has documented that past and current engagement in activities that stimulate the brain may buffer against disease progression in people with multiple sclerosis, Alzheimer's disease, or other neurological conditions<sup>6-8</sup>, and may be protective against cognitive impairment after chemotherapy in cancer patients<sup>9</sup>. The past and current "reserve-building activities"<sup>10,11</sup> may reflect not only whole-brain stimulation (e.g., education, childhood enrichment activities) but also "multiple intelligences" (i.e., skills ranging across intellectual, artistic, and physical pursuits)<sup>12</sup>. Thus, engaging in reserve-building activities may promote better health outcomes across the health-illness spectrum (i.e., resilience) by helping the individual to stimulate the brain; and to remain flexible and with higher plasticity<sup>10,13-16</sup>. This flexibility may translate to more adaptive ways of coping<sup>17</sup>, as well as to appraisal processes that emphasize the positive and focus on aspects of their life that are more controllable<sup>18</sup>.

To date, the fields of social determinants of health and reserve have remained distinct. Their inter-connection led to the present study involving a heterogeneous cohort of people with chronic illness. We seek to test the hypothesis that the SES-resilience link is mediated by reserve-building activities.

## Methods

### Sample

Eligible participants were patients with a chronic medical condition of age 18 years or older, and able to complete an online questionnaire. Participants were recruited from Rare Patient Voice, LLC and WhatNext panels, which include people with diagnoses of a heterogeneous grouping of chronic health conditions (Rare Patient Voice) and cancer (WhatNext). The panel participants were recruited in-person at conferences and gatherings of disease-specific organizations.

### Patient and Public Involvement

The present study did not directly involve patients or the public in its design. It did, however, follow-up on a decade-long evolution. The concept of reserve-building evolved over a decade of research with chronically ill patients. The measure of reserve-building was developed over a period of seven years, involving patient feedback and input on item development, and cognitive interviews of earlier versions of the measure. Finally, the research question “Is reserve-building only available to patients with substantial financial and other socioeconomic resources?” was formulated by patients in open question-and-answer sessions directed at the first author at conference presentations. Results of this research path have been provided to study participants in the form of lay-language slide presentations supplied by the first author.

### Procedure and Design

A web-based survey was administered in Spring 2016 using the HIPAA-compliant, secure SurveyGizmo engine ([www.surveygizmo.com](http://www.surveygizmo.com)). Email invitations were sent to panel members using their standard protocol for notifying panel participants of study opportunities. No financial or other incentives were offered to participants. We followed study procedures described by Dillman’s Tailored Design Method<sup>19</sup>. The survey began with an informed consent form that participants endorsed prior to completing the questionnaires. The study was reviewed and approved by the New England Review Board (NEIRB#15-254), and conforms to the principles embodied in the Declaration of Helsinki.

## Measures

**Reserve-Building** was measured with subscales from the validated *DeltaQuest Reserve-Building Measure*<sup>20</sup> assessing current reserve-building activities, past reserve-building activities, and person characteristics (see<sup>10</sup> for full details of reliability and validity of the measure). The present study included the nine Current-Reserve-Building Activities subscales: Active in the World (e.g., attending lectures; 3 items), Games (e.g., puzzles; 3 items), Outdoors (e.g., spending time outdoors; 3 items), Creative (e.g., hobbies involving working with one's hands; 4 items), Religious/Spiritual (e.g., individual or group religious; 3 items), Exercise (e.g., mild, moderate and strenuous exercise; 4 items), Inner Life (e.g., reading; 3 items), Shopping/Cooking (e.g., cooking as a hobby; 2 items), and Passive Media Consumption (e.g., watching television; 3 items). Person Factors related to reserve-building included subscales for Perseverance (5 items), Work Value (2 items), and Current Social Support (5 items)(see<sup>20</sup> for psychometric details).

To capture SES-related variables, we included the following variables from the DeltaQuest Reserve-Building measure's past reserve-building subscales: self and parent education, income, and occupational complexity. Occupational complexity was assessed using a series of skip-logic questions querying the job that was closest to the respondent's current or past occupation, which were then scored for complexity using the O\*NET system<sup>21</sup>. Additionally, we included an item asking about the respondent's difficulty paying bills<sup>22</sup>. This item was reverse-coded so that higher scores reflected *lower* difficulty paying bills.

**Resilience** was measured using a residual model approach described below in Statistical Analysis. Items from the *Centers for Disease Control (CDC) Healthy Days Core Module*<sup>23</sup> was used to create the Resilience score, consistent with prior work done by members of our group<sup>24</sup>. Two items ask the respondent to indicate how many days of the past 30 days their physical (Physical Health Problems) or mental (Mental Health Problems) health, respectively, was not good. A third item (Activities of Daily

1 Living Impaired (ADL Impaired)) asks how many days of the past 30 the respondent's poor physical  
2  
3 or mental health kept them from doing their usual activities, such as self-care, work, or recreation.  
4  
5

6 Respondent **demographic characteristics** included age, gender, cohabitation/marital status, with  
7  
8 whom the person lives, employment status, annual household income categories, and number of  
9  
10 comorbidities, as measured by the *Self-Administered Comorbidity Questionnaire* <sup>25</sup>.  
11  
12

### 13 14 **Statistical Analysis**

15 To operationalize Resilience, we built on a precedent for using residual modeling to study  
16  
17 epiphenomena <sup>26-28</sup>. We computed a regression model with the CDC Healthy Days ADL Impaired as  
18  
19 the dependent variable, and Physical Health Problems, Mental Health Problems, and their interaction  
20  
21 as predictors. The residuals from the regression model were saved and multiplied by negative one (-  
22  
23 1). Thus, a high Resilience score reflects fewer-than-expected days that the respondent is unable to  
24  
25 function due to physical or mental health problems or the synergistic effect of physical and mental  
26  
27 health problems <sup>24</sup>.  
28  
29  
30

31  
32 General SES was operationalized using a bifactor methodology (e.g., <sup>29 30</sup>). In a bifactor model, factor  
33  
34 loadings on the single *general* factor reflect the magnitude of relationships between the variables  
35  
36 (e.g., self and parent education, income, and occupational complexity) and general SES. In the  
37  
38 bifactor context, shared content between subsets of variables is captured by a second loading on a  
39  
40 content-*specific* factor. For example, the residual correlation between mother's and father's education  
41  
42 may be captured by the specific factor Parent's Education. Similarly, the residual correlation between  
43  
44 income and difficulty paying bills is captured by the specific factor Personal Finance. In this manner,  
45  
46 the bifactor model accounts for dependencies between items when establishing a total SES score.  
47  
48  
49

50  
51 Mediation models were conducted within a structural equation modeling (SEM) framework. It was  
52  
53 hypothesized that Reserve-Building activities would mediate the relationship between SES and  
54  
55 Resilience. In mediation analyses there are two types of relationships (*pathways*) to consider. There  
56  
57  
58  
59

1 is the *direct effect* from SES to Resilience, and there is the *indirect effect* from SES to Resilience  
2  
3 through both variables' relationship with Reserve-Building (the *mediator*; See Figure 1). In this  
4  
5 instance, mediation occurs when some (partial) or all (full) of the direct effect between SES and  
6  
7 Resilience is accounted for by the indirect effect through Reserve-Building.  
8  
9

10 [FIGURE 1 NEAR HERE]  
11  
12

13 SEM mediation analyses were conducted using Mplus version 7 software. Model fit was evaluated  
14  
15 using the following indices:  $RMSEA \leq .08$ ,  $TLI \geq .95$ , and  $CFI \geq .95$ ;<sup>31 32</sup>. Analyses of observed variables  
16  
17 were conducted using Stata 15<sup>33</sup> and SPSS 24<sup>34</sup>. Pearson correlations were evaluated using  
18  
19 Cohen's criteria for delineating small ( $0.10 < r < 0.30$ ), medium ( $0.30 < r < 0.50$ ), and large ( $r > 0.50$ )  
20  
21 effect sizes, hereafter referred to as small, medium and large correlations<sup>35</sup>. We examined  
22  
23 distributions of all variables to be included in the analysis.  
24  
25  
26  
27

## 28 Results

### 29 Sample

30 The study sample included 442 patients. Table 1 provides the sociodemographic characteristics, ICD-  
31  
32 10 categories, and reported comorbidities of this heterogeneous sample. The sample had a mean  
33  
34 age of 49, and 85% were female. Most respondents were married and living with spouse and/or  
35  
36 family members. The sample was predominantly white (91%), non-Hispanic ethnicity (92%), with 5%  
37  
38 of respondents endorsing black race and 3% endorsing Asian, Middle-Eastern or Other. The most  
39  
40 prevalent ICD-10 index health conditions (i.e., for panel membership) were diseases of the nervous  
41  
42 system followed by neoplasms, and endocrine diseases. The most prevalent co-morbidities were  
43  
44 back pain, depression, and insomnia. Sixty-nine percent of the sample reported a family income of  
45  
46 less than \$100,000 annually, and 69% of the sample reported that it was somewhat, very, or  
47  
48 extremely difficult to pay their bills. The majority of the sample reported past or current occupations  
49  
50 reflecting little to medium preparation needed.  
51  
52  
53  
54  
55  
56  
57  
58  
59  
60

1  
2  
3  
4  
5  
6  
7  
8  
9  
10  
11  
12  
13  
14  
15  
16  
17  
18  
19  
20  
21  
22  
23  
24  
25  
26  
27  
28  
29  
30  
31  
32  
33  
34  
35  
36  
37  
38  
39  
40  
41  
42  
43  
44  
45  
46  
47  
48  
49  
50  
51  
52  
53  
54  
55  
56  
57  
58  
59  
60

| <b>Variable</b>                                      |                                                                               |              |
|------------------------------------------------------|-------------------------------------------------------------------------------|--------------|
| <b>n</b>                                             |                                                                               | 442          |
| <b>Age</b>                                           | Mean (sd)                                                                     | 48.97(12.96) |
| <b>Gender (%)</b>                                    | Male                                                                          | 15%          |
|                                                      | Female                                                                        | 85%          |
| <b>ICD-10 Diagnostic Category of Index Condition</b> | Certain infectious and parasitic diseases                                     | 1%           |
|                                                      | Neoplasms                                                                     | 25%          |
|                                                      | Diseases of the blood and blood-forming organs and immune mechanism disorders | 5%           |
|                                                      | Endocrine, nutritional and metabolic diseases                                 | 6%           |
|                                                      | Mental and behavioral disorders                                               | 3%           |
|                                                      | Diseases of the nervous system                                                | 42%          |
|                                                      | Diseases of the ear and mastoid process                                       | 0%           |
|                                                      | Diseases of the circulatory system                                            | 3%           |
|                                                      | Diseases of the respiratory system                                            | 3%           |
|                                                      | Diseases of the digestive system                                              | 1%           |
|                                                      | Diseases of the skin and subcutaneous tissue                                  | 1%           |
|                                                      | Diseases of the musculoskeletal system and connective tissue                  | 6%           |
|                                                      | Diseases of the genitourinary system                                          | 0%           |
|                                                      | Congenital malformations, deformations and chromosomal abnormalities          | 1%           |
| <b>Comorbidities (%)</b>                             | Arthritis                                                                     | 38%          |
|                                                      | Asthma                                                                        | 19%          |
|                                                      | Back Pain                                                                     | 58%          |
|                                                      | Cancer (now or in the past)                                                   | 31%          |
|                                                      | Depression                                                                    | 52%          |
|                                                      | Diabetes                                                                      | 10%          |
|                                                      | Heart Disease                                                                 | 10%          |
|                                                      | High Blood Pressure                                                           | 31%          |
|                                                      | Insomnia                                                                      | 43%          |
|                                                      | Kidney Disease                                                                | 5%           |
|                                                      | Liver Disease                                                                 | 3%           |
|                                                      | Lung Disease                                                                  | 11%          |
|                                                      | Stroke                                                                        | 2%           |
| Ulcer or stomach disease                             | 13%                                                                           |              |
| <b>Education (%)</b>                                 | High school or less                                                           | 14%          |
|                                                      | Some college                                                                  | 38%          |
|                                                      | College degree                                                                | 27%          |
|                                                      | Graduate degree                                                               | 20%          |
|                                                      | Missing                                                                       | 0%           |
| <b>Father's Education</b>                            | High school or less                                                           | 48%          |
|                                                      | Some college                                                                  | 22%          |
|                                                      | College degree                                                                | 14%          |
|                                                      | Graduate degree                                                               | 11%          |

## Reserve-Building and SES, page 12

|                                                                                                |                                            |     |
|------------------------------------------------------------------------------------------------|--------------------------------------------|-----|
|                                                                                                | Missing                                    | 5%  |
| <b>Mother's Education</b>                                                                      | High school or less                        | 49% |
|                                                                                                | Some college                               | 30% |
|                                                                                                | College degree                             | 11% |
|                                                                                                | Graduate degree                            | 8%  |
|                                                                                                | Missing                                    | 2%  |
| <b>Marital Status (%)</b>                                                                      | Never Married                              | 15% |
|                                                                                                | Married                                    | 60% |
|                                                                                                | Cohabitation/ Domestic Partnership         | 7%  |
|                                                                                                | Separated                                  | 2%  |
|                                                                                                | Divorced                                   | 13% |
|                                                                                                | Widowed                                    | 2%  |
|                                                                                                | Missing                                    | 1%  |
| <b>Living Situation* (%)</b>                                                                   | Spouse/ Partner                            | 69% |
|                                                                                                | Other Relative (children, sibling, parent) | 44% |
|                                                                                                | Friend/ Companion                          | 4%  |
|                                                                                                | Pet(s)                                     | 48% |
|                                                                                                | Alone                                      | 11% |
|                                                                                                | Other                                      | 1%  |
| <b>Income (%)</b>                                                                              | Less than \$15,000                         | 11% |
|                                                                                                | \$15,001 to \$30,000                       | 14% |
|                                                                                                | \$30,001 to \$50,000                       | 17% |
|                                                                                                | \$50,001 to \$100,000                      | 27% |
|                                                                                                | \$100,001 to \$150,000                     | 13% |
|                                                                                                | \$150,001 to 200,000                       | 4%  |
|                                                                                                | Over \$200,000                             | 2%  |
|                                                                                                | Missing                                    | 12% |
| <b>Difficulty paying bills</b>                                                                 | Extremely difficult                        | 28% |
|                                                                                                | Very difficult                             | 16% |
|                                                                                                | Somewhat difficult                         | 24% |
|                                                                                                | Slightly difficult                         | 12% |
|                                                                                                | Not difficult at all                       | 16% |
|                                                                                                | Missing                                    | 3%  |
| <b>Occupational Complexity (ONET Job Zone)</b>                                                 | 1: Little or No Preparation Needed         | 5%  |
|                                                                                                | 2: Some Preparation Needed                 | 23% |
|                                                                                                | 3: Medium Preparation Needed               | 24% |
|                                                                                                | 4: Considerable Preparation Needed         | 22% |
|                                                                                                | 5: Extensive Preparation Needed            | 7%  |
|                                                                                                | Missing                                    | 19% |
| <i>*May add up to more than 100% because respondents were allowed to check all that apply.</i> |                                            |     |



1  
2  
3  
4 Table 2 shows descriptive statistics of the reserve-building, person factors and demographic scores  
5  
6 used to create the SES latent variable scores. Mother's education level was positively skewed,  
7  
8 suggesting that most participants reported relatively low levels of maternal education. Two of the  
9  
10 current Reserve-Building subscales were negatively skewed (Passive Media Consumption, Inner  
11  
12 Life), suggested that most people spent substantial amounts of time in both of these types of  
13  
14 activities. The other variables tested in the SEM model were normally distributed.  
15  
16  
17  
18  
19  
20  
21  
22  
23  
24  
25  
26  
27  
28  
29  
30  
31  
32  
33  
34  
35  
36  
37  
38  
39  
40  
41  
42  
43  
44  
45  
46  
47  
48  
49  
50  
51  
52  
53  
54  
55  
56  
57  
58  
59  
60

| <b>Table 2. Descriptive Statistics of Variables Used In SEM Analysis</b> |            |               |                            |                 |
|--------------------------------------------------------------------------|------------|---------------|----------------------------|-----------------|
|                                                                          | <b>Obs</b> | <b>Median</b> | <b>Variable Label</b>      | <b>Skewness</b> |
| <b>General SES</b>                                                       |            |               |                            |                 |
| Participant's Education                                                  | 440        | 2             | High School Diploma or GED | 0.11            |
| Mother's Education                                                       | 431        | 1             | Some High School or Less   | <b>1.05</b>     |
| Father's Education                                                       | 418        | 1             | Some High School or Less   | 0.85            |
| Job Complexity                                                           | 358        | 3             | Medium Preparation Needed  | 0.03            |
| <b>Personal Finance</b>                                                  |            |               |                            |                 |
| Income                                                                   | 387        | 4             | \$50,001 to \$100,000      | 0.12            |
| Difficulty Paying Bills                                                  | 428        | 3             | Somewhat difficult         | 0.27            |
|                                                                          | <b>Obs</b> | <b>Mean</b>   | <b>Std. Dev.</b>           | <b>Skewness</b> |
| <b>Current Reserve-Building Subscales</b>                                |            |               |                            |                 |
| Active in the World                                                      | 439        | 49.91         | 7.65                       | 0.65            |
| Games                                                                    | 332        | 49.60         | 6.90                       | -0.10           |
| Outdoor                                                                  | 438        | 49.40         | 7.63                       | 0.35            |
| Creative                                                                 | 440        | 50.03         | 7.03                       | 0.47            |
| Religious / Spiritual                                                    | 437        | 49.97         | 7.68                       | 0.45            |
| Exercise                                                                 | 435        | 49.42         | 7.29                       | 0.60            |
| Passive Media Consumption                                                | 434        | 50.27         | 6.75                       | <b>-1.25</b>    |
| Shopping / Cooking                                                       | 438        | 49.86         | 8.01                       | 0.36            |
| Inner life                                                               | 334        | 50.39         | 6.71                       | <b>-1.17</b>    |
| <b>Resilience</b>                                                        | 442        | -0.11         | 1.02                       | -0.19           |
| <b>Covariate</b>                                                         |            |               |                            |                 |
| Number of Comorbidities                                                  | 442        | 5.43          | 3.68                       | 0.81            |

Table 3 shows Pearson correlation coefficients among the variables considered in the current study.

It revealed that the socioeconomic indices generally had small correlations, although mother's and father's education had moderate correlations, and difficulty paying bills had a moderate correlation with number of comorbidities. The Reserve-Building subscales generally had small or negligible correlations with socioeconomic indices, and small to moderate inter-correlations. The Reserve-Building measures generally had small or negligible correlations with the resilience score. Four Reserve-Building scores had small correlations with Resilience: Active in the World, Outdoors,

1 Exercise, and Shopping/Cooking. The resilience score was most driven by (fewer) number of days  
2  
3 with physical health problems. Resilience had a moderate negative correlation with number of  
4  
5 comorbidities and difficulty paying bills, and small positive correlations with respondent's education  
6  
7 and income tertile. Resilience was not correlated with mother's education, father's education, or job  
8  
9 complexity. The correlation matrix providing a starting point for parsimonious SEM model building,  
10  
11 suggesting that the socioeconomic indicators be modeled as a latent variable(s), and considering only  
12  
13 four of the nine Reserve-Building scores in the model: Active in the World, Outdoor, Exercise, and  
14  
15 Shopping/Cooking.  
16  
17  
18  
19  
20  
21  
22  
23  
24  
25  
26  
27  
28  
29  
30  
31  
32  
33  
34  
35  
36  
37  
38  
39  
40  
41  
42  
43  
44  
45  
46  
47  
48  
49  
50  
51  
52  
53  
54  
55  
56  
57  
58  
59  
60

**Table 3. Correlation Matrix of Variables Included in SEM Modeling**

|                                 | 1     | 2     | 3    | 4    | 5    | 6    | 7    | 8    | 9    | 10   | 11   | 12   | 13   | 14   | 15   | 16   | 17   | 18   | 19   | 20   | 21   |
|---------------------------------|-------|-------|------|------|------|------|------|------|------|------|------|------|------|------|------|------|------|------|------|------|------|
| 1 Age                           |       |       |      |      |      |      |      |      |      |      |      |      |      |      |      |      |      |      |      |      |      |
| 2 Gender                        | 0.04  |       |      |      |      |      |      |      |      |      |      |      |      |      |      |      |      |      |      |      |      |
| 3 No. conditions                | 0.20  | -0.09 |      |      |      |      |      |      |      |      |      |      |      |      |      |      |      |      |      |      |      |
| 4 Respondent's Education        | 0.13  | 0.03  | -    |      |      |      |      |      |      |      |      |      |      |      |      |      |      |      |      |      |      |
| 5 Mother's Education            | -0.15 | 0.06  | 0.05 | 0.19 |      |      |      |      |      |      |      |      |      |      |      |      |      |      |      |      |      |
| 6 Father's Education            | -0.09 | 0.02  | 0.05 | 0.26 | 0.46 |      |      |      |      |      |      |      |      |      |      |      |      |      |      |      |      |
| 7 O*NET Occupational Complexity | 0.23  | 0.04  | 0.04 | 0.55 | 0.10 | 0.24 |      |      |      |      |      |      |      |      |      |      |      |      |      |      |      |
| 8 Income Tertile                | 0.17  | -0.03 | 0.25 | 0.29 | 0.07 | 0.07 | 0.25 |      |      |      |      |      |      |      |      |      |      |      |      |      |      |
| 9 Difficulty Paying Bills       | -0.29 | -0.06 | 0.33 | 0.13 | 0.02 | 0.02 | 0.15 | 0.48 |      |      |      |      |      |      |      |      |      |      |      |      |      |
| 10 Active in the World          | 0.10  | 0.05  | 0.08 | 0.26 | 0.11 | 0.14 | 0.22 | 0.24 | 0.25 |      |      |      |      |      |      |      |      |      |      |      |      |
| 11 Games                        | 0.10  | -0.12 | 0.08 | 0.04 | 0.02 | 0.06 | 0.05 | 0.05 | 0.12 | 0.19 |      |      |      |      |      |      |      |      |      |      |      |
| 12 Outdoor                      | 0.05  | 0.09  | 0.09 | 0.12 | 0.02 | 0.07 | 0.08 | 0.16 | 0.21 | 0.31 | 0.21 |      |      |      |      |      |      |      |      |      |      |
| 13 Creative                     | 0.02  | 0.02  | 0.06 | 0.05 | 0.08 | 0.06 | 0.06 | 0.05 | 0.05 | 0.33 | 0.25 | 0.41 |      |      |      |      |      |      |      |      |      |
| 14 Religious / Spiritual        | 0.08  | -0.08 | 0.04 | 0.00 | 0.04 | 0.02 | 0.00 | 0.06 | 0.11 | 0.29 | 0.20 | 0.23 | 0.34 |      |      |      |      |      |      |      |      |
| 15 Exercise                     | -0.03 | 0.18  | 0.15 | 0.18 | 0.16 | 0.07 | 0.06 | 0.22 | 0.26 | 0.36 | 0.11 | 0.43 | 0.25 | 0.16 |      |      |      |      |      |      |      |
| 16 Passive media consumption    | -0.10 | 0.06  | 0.10 | 0.11 | 0.17 | 0.08 | 0.06 | 0.13 | 0.01 | 0.03 | 0.19 | 0.02 | 0.07 | 0.02 | 0.02 |      |      |      |      |      |      |
| 17 Shopping / Cooking           | -0.05 | -0.02 | 0.06 | 0.07 | 0.06 | 0.01 | 0.08 | 0.08 | 0.11 | 0.24 | 0.25 | 0.30 | 0.34 | 0.27 | 0.23 | 0.18 |      |      |      |      |      |
| 18 Inner Life                   | 0.13  | -0.02 | 0.03 | 0.14 | 0.03 | 0.09 | 0.11 | 0.12 | 0.19 | 0.12 | 0.44 | 0.19 | 0.18 | 0.13 | 0.17 | 0.20 | 0.12 |      |      |      |      |
| 19 Resilience                   | 0.08  | 0.08  | 0.31 | 0.12 | 0.09 | 0.04 | 0.01 | 0.24 | 0.39 | 0.25 | 0.05 | 0.23 | 0.07 | 0.08 | 0.28 | 0.09 | 0.13 | 0.04 |      |      |      |
| 20 Healthy_days1                | 0.03  | -0.06 | 0.29 | 0.12 | 0.09 | 0.08 | 0.05 | 0.18 | 0.26 | 0.21 | 0.03 | 0.22 | 0.04 | 0.05 | 0.28 | 0.11 | 0.11 | 0.03 | 0.91 |      |      |
| 21 Healthy_days2                | -0.23 | -0.08 | 0.21 | 0.08 | 0.05 | 0.04 | 0.06 | 0.24 | 0.43 | 0.22 | 0.06 | 0.15 | 0.10 | 0.12 | 0.16 | 0.04 | 0.12 | 0.04 | 0.71 | 0.36 |      |
| 22 Healthy_days3                | -0.09 | -0.05 | 0.29 | -    | -    | -    | -    | -    | 0.35 | -    | 0.02 | -    | -    | -    | -    | 0.09 | -    | -    | -    | 0.59 | 0.48 |

1  
2  
3  
4  
5  
6  
7  
8  
9  
10  
11  
12  
13  
14  
15  
16  
17  
18  
19  
20  
21  
22  
23  
24  
25  
26  
27  
28  
29  
30  
31  
32  
33  
34  
35  
36  
37  
38  
39  
40  
41  
42  
43  
44  
45  
46  
47



small correlation: unrelated constructs (0.10 < Pearson's R < 0.30)

moderate correlation: related but not overlapping constructs (0.30 < Pearson's R < 0.50)

large correlation: overlapping constructs ( Pearson's R > 0.5)

For peer review only

### Step 1: Bifactor model of SES

We first modeled SES as a bifactor model with the general factor comprised of respondent's education, father's education, mother's education, occupational complexity, income tertile, and endorsed difficulty paying bills (Supplementary Figure 1). The specific (i.e., orthogonal) factors in the bifactor model account for residual covariance between Parent's Education (mother's and father's education) and Personal Finance (income and difficulty paying bills). Note that the magnitude of the general factor loadings is small for those items that also have factor loadings on Parent's Education and Personal Finance. This pattern is due to the strength of the covariance between these item subsets, and is reflected in the relatively high loadings on the specific factors. The bifactor SES model closely fit the data ( $\chi^2=9.3$ ,  $df=7$ ,  $p=.23$ ;  $RMSEA=.027$ ,  $CFI=0.996$ ,  $TLI=0.992$ ) and provided a starting point for subsequent mediation models.

### Step 2: Simple mediation models for Reserve-Building activities

We next evaluated a series of simple mediation models where each of the nine Reserve-Building activities mediated the relationship between the general SES factor and Resilience (Supplementary Table 1). The results of these models led to the selection of three Reserve-Building activities for subsequent SEM-based mediation models: Active in the World, Outdoor, and Exercise were significant mediators of the relationship between SES and Resilience. Of note, exercise was the strongest direct predictor for Resilience.

### Step 3: Full mediation models tested

We then developed a mediation model where the relationship between SES (step 1) and Resilience was mediated by the three Reserve-Building activities identified in step 2. An addition, the number of comorbidities was modeled as a covariate of Resilience. The penultimate model accounted for 19% of variance in Resilience but poorly fit the data ( $\chi^2=229.1$ ,  $df=36$ ,  $p<.01$ ;  $RMSEA=.110$ ,  $CFI=0.796$ ,  $TLI=0.689$ ; See Supplementary Table 2).

1 Review of modification indices and the correlation matrix in Table 3 suggested that the penultimate  
2 mediation model was not accounting for relationships between Personal Finance, as defined in the  
3 bifactor model, and Resilience. After adding the Personal Finance latent variable as a predictor of  
4 Resilience, the final mediation model accounted for 25% of the variance in Resilience and closely fit  
5 the data ( $\chi^2=47.4$ ,  $df=31$ ,  $p=.03$ ;  $RMSEA=.035$ ,  $CFI=0.983$ ,  $TLI=0.970$ ; See Table 4).  
6  
7  
8  
9  
10  
11  
12  
13  
14  
15  
16  
17  
18  
19  
20  
21  
22  
23  
24  
25  
26  
27  
28  
29  
30  
31  
32  
33  
34  
35  
36  
37  
38  
39  
40  
41  
42  
43  
44  
45  
46  
47  
48  
49  
50  
51  
52  
53  
54  
55  
56  
57  
58  
59  
60

| <b>Table 4. Final SEM Mediation Model Including Finance as a Predictor</b>                                |                                   |                      |           |          |                  |
|-----------------------------------------------------------------------------------------------------------|-----------------------------------|----------------------|-----------|----------|------------------|
|                                                                                                           | <b>Model</b>                      | <b>beta</b>          | <b>se</b> | <b>t</b> | <b>P value</b>   |
|                                                                                                           |                                   |                      |           |          |                  |
| Predicting reserve building                                                                               | SES -> Active in the world        | 0.33                 | 0.05      | 6.48     | <b>&lt;0.001</b> |
|                                                                                                           | SES -> Outdoor activities         | 0.14                 | 0.06      | 2.47     | <b>0.014</b>     |
|                                                                                                           | SES -> Exercise                   | 0.19                 | 0.05      | 3.55     | <b>&lt;0.001</b> |
|                                                                                                           | Finance -> Active in the world    | 0.26                 | 0.05      | 4.92     | <b>&lt;0.001</b> |
|                                                                                                           | Finance -> Outdoor activities     | 0.22                 | 0.06      | 4.07     | <b>&lt;0.001</b> |
|                                                                                                           | Finance -> Exercise               | 0.30                 | 0.05      | 6.03     | <b>&lt;0.001</b> |
| Predicting resilience: Direct effects                                                                     | SES -> Resilience                 | 0.04                 | 0.06      | 0.71     | 0.476            |
|                                                                                                           | Finance -> Resilience             | 0.31                 | 0.07      | 4.72     | <b>&lt;0.001</b> |
|                                                                                                           | Active in the world -> Resilience | 0.08                 | 0.05      | 1.57     | 0.116            |
|                                                                                                           | Outdoor activities -> Resilience  | 0.07                 | 0.05      | 1.37     | 0.170            |
|                                                                                                           | Exercise -> Resilience            | 0.10                 | 0.05      | 1.88     | 0.060            |
|                                                                                                           | Comorbid Conditions -> Resilience | -<br>0.14            | 0.05      | -2.86    | <b>0.004</b>     |
| Predicting resilience: Total indirect effects                                                             | SES -> Resilience                 | 0.06                 | 0.02      | 2.65     | <b>0.008</b>     |
|                                                                                                           | Finance -> Resilience             | 0.13                 | 0.03      | 4.06     | <b>&lt;0.001</b> |
|                                                                                                           |                                   | <b>R<sup>2</sup></b> | <b>se</b> | <b>t</b> | <b>P value</b>   |
| R square                                                                                                  | Education                         | 0.78                 | 0.11      | 6.87     | <b>&lt;0.001</b> |
|                                                                                                           | Father Education                  | 0.59                 | 0.04      | 13.71    | <b>&lt;0.001</b> |
|                                                                                                           | Mother Education                  | 0.55                 | 0.04      | 13.00    | <b>&lt;0.001</b> |
|                                                                                                           | ONET                              | 0.46                 | 0.08      | 6.14     | <b>&lt;0.001</b> |
|                                                                                                           | INCOME                            | 0.63                 | 0.04      | 15.11    | <b>&lt;0.001</b> |
|                                                                                                           | Difficulty paying bills           | 0.58                 | 0.04      | 13.12    | <b>&lt;0.001</b> |
|                                                                                                           | Number of Conditions              | 0.20                 | 0.05      | 3.79     | <b>&lt;0.001</b> |
|                                                                                                           | Active in the world               | 0.18                 | 0.04      | 4.18     | <b>&lt;0.001</b> |
|                                                                                                           | Outdoor activities                | 0.07                 | 0.03      | 2.39     | <b>0.017</b>     |
|                                                                                                           | Exercise                          | 0.13                 | 0.04      | 3.64     | <b>&lt;0.001</b> |
|                                                                                                           | Resilience                        | 0.25                 | 0.05      | 5.54     | <b>&lt;0.001</b> |
| <b>Model Fit Statistics:</b> $\chi^2=47.4$ , $df=31$ , $p=.03$ ; $RMSEA=.035$ , $CFI=0.983$ , $TLI=0.970$ |                                   |                      |           |          |                  |
| Path coefficients are reflected by " -> "                                                                 |                                   |                      |           |          |                  |



1 As illustrated in Figure 2, the relationship between Resilience and both SES and Personal Finance is  
2 mediated by three Reserve-Building activities (Active in the World, Outdoor, and Exercise). In other  
3 words, the bivariate relationships (SES to Resilience) were significant until Reserve-Building activities  
4 were included in the model, and then the significant relationships were *only* from SES to Reserve-  
5 Building, but not the paths from Reserve-Building to Resilience. Further, the three specific Reserve-  
6 Building to Resilience paths have p-values are .00, .12, and .17, two of which are *nearly* significant or  
7 highly significant. The total mediation effect considers them as a whole collection, and taken together  
8 they do account for enough of the variance to create a total mediation effect.  
9

10 In addition, the Personal Finance to Resilience path is also mediated by the participant's number of  
11 comorbid conditions. As indicated in Table 4, there are significant total indirect effects from both  
12 General SES ( $b = 0.06, p < 0.01$ ) and Personal Finance ( $b = 0.13, p < 0.01$ ) to Resilience. This model  
13 supports the hypothesis that the relationship between General SES and Resilience is fully mediated  
14 by engaging in the three Reserve-Building activities. However, there is only partial mediation from  
15 Personal Finance to Resilience because of the remaining significant direct effect ( $b = 0.31, p < 0.01$ ).  
16 Higher levels of Personal Finance were also negatively associated with number of comorbidities, and  
17 those with more comorbidities generally had lower levels of Resilience.  
18

19 [FIGURE 2 NEAR HERE]

## 20 **Post-hoc Analyses**

21 Figures 3a-3c juxtapose the relationship between reserve-building and resilience and the mean level  
22 of each reserve-building activity, by SES-tertile group. Z-score transformations were used to compare  
23 the correlation coefficients, and analysis of variance was used to compare means by group (Type I  
24 error rate of 0.05). Figure 3a illustrates that the relationship between Active in the World and  
25 resilience is similar across SES groups ( $z=0.28, p=0.39$ ), but the mean level of these activities varied  
26 by SES group ( $F=7.20, df=2, p=0.001$ ). For Outdoor activities, the associations with resilience were  
27

not statistically significant ( $z=1.65$ ,  $p<0.10$ ), and the group means were not different from each other ( $F=1.30$ ,  $df=2$ ,  $p=0.27$ ). For Exercise, however, the medium and high SES groups showed a statistically significant difference in associations with resilience ( $z=2.10$ ,  $p<0.05$ ), and the group means were not different from each other ( $F=2.57$ ,  $df=2$ ,  $p=0.08$ ).

[FIGURES 3a-c NEAR HERE]

## Discussion

Our findings are consistent with the idea that the SES-Resilience link is mediated by the individual's engagement in Reserve-Building activities. Thus, people with higher SES tend to be more resilient in the face of chronic illness by dint of their regular practice of activities that stimulate them intellectually, culturally, and physically. In other words, people with higher SES may be more likely to spend their discretionary time engaging in reserve-building activities, and this practice makes them more resilient despite their chronic illness. The post-hoc analyses revealed that the association between reserve-building and resilience was similar across SES-tertile groups for Active in the World and Outdoor activities, but not for Exercise. For Exercise, medium-SES people who engaged in more exercise had more resilience, but this was not as strongly associated in the high-SES group. The high-SES group engaged in more Active in the World activities but similar levels of Outdoor and Exercise activities compared to the other SES-tertile groups. Our findings suggest that resilience is not determined by SES, but is modifiable if individuals can augment their practice of three types of reserve-building activities, such as attending lectures or concerts, participating in outdoor activities, and engaging in physical exercise. Choosing to engage in these three types of activities rather than other more passive, less stimulating activities appears to have a beneficial association with health.

A second finding of the present study is that Personal Finance had a direct effect on resilience: individuals with higher income and/or lower difficulty paying bills had higher resilience scores. Personal Finance also played a role in the relationship between number of comorbidities and

1 resilience: people with more financial resources tended to have fewer comorbidities, these financial  
2  
3 resources had a smaller protective effect in the context of multiple comorbidities. This finding may  
4  
5 reflect the fact that people with fewer financial resources are less likely to treat their comorbidities <sup>36</sup>.  
6  
7

8 Untreated comorbidities would likely reduce one's ability to be resilient to health challenges.  
9

10  
11 There has been an increasing interest in improving healthcare outcomes. In this context, 'social  
12  
13 determinants of health' are more often than not cast in terms of deficits or negative situations that  
14  
15 people encounter<sup>37 38</sup>. What is missing is addressing positive social determinants of health <sup>39 40</sup>, or  
16  
17 person factors that confer resilience, such as reserve-building activities. Our findings suggest that it  
18  
19 would be worthwhile to recommend the three types of activities associated with enhanced resilience.  
20  
21 Although exercise is standardly recommended to reduce mortality, our findings suggest that it is also  
22  
23 beneficial for conferring day-to-day resilience in the face of physical or mental health problems.  
24  
25 Further, other types of activities may confer similar benefits. Thus, there may be more options that  
26  
27 healthcare providers can offer to people that can help them achieve better resilience and that might fit  
28  
29 their lifestyle more easily, if exercise is not a viable option.  
30  
31  
32

33  
34 The present study has a notable strength in its large and heterogeneous sample, which is useful for  
35  
36 testing a complex hypothesis via SEM techniques. It included both income and difficulty paying bills in  
37  
38 the operationalization of General SES and Personal Finance, thus capturing complementary and  
39  
40 distinct aspects of financial well-being that are often not considered in tandem. The sample had  
41  
42 important variability in comorbidity burden, which allowed for evaluating the independent relationship  
43  
44 between comorbidity and resilience. The limitations of this study should, however, be noted. While the  
45  
46 sample is heterogeneous in its illness representation, it is predominantly comprised of middle-aged  
47  
48 white females who are married or living with family members. Accordingly, there was too little  
49  
50 variation in race or ethnicity to permit inclusion of these variables in the SEM models. Thus, additional  
51  
52 work is needed to establish relationships with resilience across age, gender, race, and ethnicity  
53  
54  
55  
56  
57  
58  
59

1 groups. Indeed, age and gender were not strongly related as shown in bivariate correlations and thus  
2  
3 were not kept in our SEM models. We are unable to quantify the response rate and thus to further  
4  
5 identify the selection bias because we do not have access to information about who was invited to  
6  
7 participate in the study and opted not to participate. The data are also cross-sectional, limiting our  
8  
9 ability to test mediation effects with certainty or causal effects. There is, however, some debate about  
10  
11 cross-sectional mediation when the presumed mediator logically precedes the outcome, even if both  
12  
13 are measured in the same survey. In our case, the data were collected at one time-point, but the  
14  
15 reserve-building activities logically precede the resilience score. The reserve-building items query  
16  
17 activities done over the past one to six months, depending on the type of activity, and these activities  
18  
19 are generally long-standing hobbies or practices. The SES variables are either far in the past (e.g.,  
20  
21 parental education, participant education) or relatively long-standing (i.e., over the past year or two,  
22  
23 such as income or difficulty paying bills). In contrast, the resilience questions query physical and  
24  
25 mental health sick-days of only *the past 30 days*. Thus, there is a logical precedence to the activities  
26  
27 included as predictors or mediators. Nonetheless, replication of our findings in longitudinal data is  
28  
29 needed to dispute possible “reverse causality” (i.e., the presumed mediator causes the presumed  
30  
31 outcome or vice versa) . Finally, there are potential confounding factors, such as structural  
32  
33 environmental factors, that were not addressed in the analysis. While it may be true that many of the  
34  
35 reserve-building activities are free or inexpensive, that does not mean that they are equally  
36  
37 accessible across SES groups. For example, people from lower SES backgrounds are often limited in  
38  
39 their available free time (especially those who work more than one job) and in structural opportunities  
40  
41 for activities like exercise (limited availability of green space, safe places to walk/run, access to gyms  
42  
43 or sports facilities) and outdoor recreation. Cooking, shopping, and many cultural events also have  
44  
45 associated costs. Even if cultural/intellectual events are free, they are often difficult to get to and  
46  
47 people from low-SES backgrounds often have transportation barriers. Future research might address  
48  
49 how to increase the perceived and real availability and opportunities for engaging in reserve-building  
50  
51  
52  
53  
54  
55  
56  
57  
58  
59

1 activities among people with fewer SES resources and/or with more severe illness. For example,  
2  
3 motivational interviewing techniques might be useful for addressing perceived barriers to different  
4  
5 types of reserve-building activities (e.g., cultural activities, exercise, etc.), and helping patients to find  
6  
7 inexpensive ways to get such activities into their lives.  
8  
9

10  
11  
12  
13 In summary, the present study provides suggestive evidence that reserve-building activities may be  
14  
15 one pathway by which SES is associated with resilience: people of higher SES may be more likely to  
16  
17 engage in reserve-building activities that are intellectually stimulating, involve outdoor pursuits, and  
18  
19 include physical exercise. The implications of these findings may be useful for empowering patients to  
20  
21 introduce more such reserve-building activities in their lives, and to replace more passive activities  
22  
23 (e.g., television) with these active, salutogenic pursuits. Fundamentally, the reserve-building activities  
24  
25 implicated in the present study are not costly to pursue (“the best things in life are free”). This critical  
26  
27 accessibility and affordability has applications for public-health interventions to enhance resilience in  
28  
29 healthy and chronically ill individuals. It is important to ensure that individuals from low SES  
30  
31 backgrounds have opportunities for reserve-building activities.  
32  
33  
34  
35

### 36 **Acknowledgements**

37 We are grateful to the patients who participated in this study.  
38  
39

### 40 **Funding details**

41 This work was unfunded by any external agency.  
42  
43

### 44 **Disclosures**

45 All authors declare that they have no potential conflicts of interest and report no disclosures.  
46  
47

### 48 **Data sharing statement**

49 Participants did not consent to having their data shared with anyone other than DeltaQuest  
50  
51 Foundation research staff.  
52  
53  
54  
55  
56  
57  
58  
59  
60

## Data deposition

Not applicable.

## References

1. Hartman M, Martin AB, Espinosa N, et al. National Health Care Spending In 2016: Spending And Enrollment Growth Slow After Initial Coverage Expansions. *Health Affairs* 2017
2. Adler NE. Health disparities through a psychological lens. *American Psychologist* 2009;64(8):663.
3. Chetty R, Stepner M, Abraham S, et al. The association between income and life expectancy in the United States, 2001-2014. *Jama* 2016;315(16):1750-66.
4. Cundiff JM, Matthews KA. Is subjective social status a unique correlate of physical health? A meta-analysis. *Health Psychology* 2017;36(12):1109.
5. Cundiff JM, Smith TW. Social status, everyday interpersonal processes, and coronary heart disease: A social psychophysiological view. *Social and Personality Psychology Compass* 2017;11(4)
6. Schwartz CE, Quaranto BR, Healy BC, et al. Cognitive reserve and symptom experience in multiple sclerosis: a buffer to disability progression over time? *Archives of physical medicine and rehabilitation* 2013;94(10):1971-81. doi: 10.1016/j.apmr.2013.05.009
7. Stern Y, Gurland B, Tatemichi TK, et al. Influence of education and occupation on the incidence of Alzheimer's disease. *Journal of the American Medical Association* 1994;271(13):1004-10. [published Online First: 1994/04/06]
8. Pernecky R, Drzezga A, Boecker H, et al. Activities of daily living, cerebral glucose metabolism, and cognitive reserve in Lewy body and Parkinson's disease. *Dementia and Geriatric Cognitive Disorders* 2008;26(5):475-81.
9. Ahles TA, Saykin AJ, McDonald BC, et al. Longitudinal assessment of cognitive changes associated with adjuvant treatment for breast cancer: Impact of age and cognitive reserve *Journal of Clinical Oncology* 2010;28(29):4434-40.

10. Schwartz CE, Rapkin BD, Healy BC. Reserve and Reserve-Building Activities Research: Key challenges and future directions. *BMC Neuroscience* 2016;17:62. doi: 10.1186/s12868-016-0297-0
11. Schwartz CE, Snook EM, Quaranto BR, et al. Cognitive reserve and patient-reported outcomes. *Multiple Sclerosis Journal* 2013;19(1):87-105. doi: 10.1177/1352458512444914 [published Online First: May 1]
12. Gardner H. *Multiple intelligences: New horizons: Basic books* 2006.
13. Aguiar AS, Jr., Castro AA, Moreira EL, et al. Short bouts of mild-intensity physical exercise improve spatial learning and memory in aging rats: involvement of hippocampal plasticity via AKT, CREB and BDNF signaling. *Mech Ageing Dev* 2011;132(11-12):560-7. doi: 10.1016/j.mad.2011.09.005 [published Online First: 2011/10/11]
14. Barulli D, Stern Y. Efficiency capacity, compensation, maintenance, plasticity: emerging concepts in cognitive reserve. *Trends in Cognitive Sciences* 2013;17(10):502-09. doi: 10.1016/j.tics.2013.08.012 [published Online First: October 2013]
15. Cotman CW, Berchtold NC. Exercise: a behavioral intervention to enhance brain health and plasticity. *Trends Neurosci* 2002;25(6):295-301. [published Online First: 2002/06/28]
16. Lovden M, Wenger E, Martensson J, et al. Structural brain plasticity in adult learning and development. *Neuroscience & Biobehavioral Reviews* 2013;37(9, Part B):2296-310.
17. Schwartz CE, Peng CK, Lester N, et al. Self-reported coping behavior in health and disease: assessment with a card sort game. *Behav Med* 1998;24(1):41-44.
18. Schwartz CE, Snook E, Quaranto B, et al. Cognitive reserve and appraisal in multiple sclerosis. *Multiple Sclerosis and Related Disorders* 2013;2(1):36-44. doi: 10.1016/j.msard.2012.07.006 [published Online First: January 2013]
19. Dillman DA, Smyth JD, Christian LM. *Internet, phone, mail, and mixed-mode surveys: The Tailored Design Method*. Fourth ed. Hoboken, NJ: John Wiley & Sons, Inc. 2014.

- 1  
2  
3  
4  
5  
6  
7  
8  
9  
10  
11  
12  
13  
14  
15  
16  
17  
18  
19  
20  
21  
22  
23  
24  
25  
26  
27  
28  
29  
30  
31  
32  
33  
34  
35  
36  
37  
38  
39  
40  
41  
42  
43  
44  
45  
46  
47  
48  
49  
50  
51  
52  
53  
54  
55  
56  
57  
58  
59  
60
20. Schwartz CE, Michael W, Zhang J, et al. Assessing reserve-building pursuits and person characteristics: Psychometric validation of the DeltaQuest Reserve-Building Measure. *Quality of Life Research* 2018;27:423-36. doi: 10.1007/s11136-017-1694-2
  21. Tsacoumis S, Willison S. O\*NET Analyst Occupational Skill Ratings: Procedures. In: Organization HRR, ed. Raleigh, NC: National Center for O\*NET Development, 2010.
  22. Hanmer J, Cherepanov D. A single question about a respondent's perceived financial ability to pay monthly bills explains more variance in health utility scores than absolute income and assets questions. *Quality of Life Research* 2016;25(9):2233-37.
  23. Measuring healthy days: Population assessment of health-related quality of life. Atlanta, GA: Centers for Disease Control and Prevention 2000.
  24. Schwartz CE, Michael W, Rapkin BD. Resilience to health challenges is related to different ways of thinking: mediators of physical and emotional quality of life in a heterogeneous rare-disease cohort. *Quality of Life Research* 2017;26(11):3075-88.
  25. Sangha O, Stucki G, Liang MH, et al. The self-administered comorbidity questionnaire: A new method to assess comorbidity for clinical and health services research. *Arthritis Care & Research* 2003;49(2):156-63.
  26. Reed BR, Mungas D, Farias ST, et al. Measuring cognitive reserve based on the decomposition of episodic memory variance. *Brain : a journal of neurology* 2010;133(Pt 8):2196-209. doi: 10.1093/brain/awq154
  27. Rapkin BD, Schwartz CE. Toward a theoretical model of quality-of-life appraisal: Implications of findings from studies of response shift. *Health and Quality of Life Outcomes* 2004;2(1):14.
  28. Bochner B, Schwartz CE, Garcia I, et al. Understanding the impact of radical cystectomy and urinary diversion in patients with bladder cancer: treatment outcomes clarified by appraisal process. *Quality of Life Research* 2017;26(Suppl 1):6.
  29. Holzinger KJ, Swineford F. The bi-factor method. *Psychometrika* 1937;2:41-54.



- 1 30. Gibbons RD, Hedeker DR. Full-information item bifactor analysis. *Psychometrika* 1992;57:423-36.
- 2
- 3 31. Hu LT, Bentler PM. Cutoff criteria for fit indexes in covariance structure analysis: Conventional
- 4 criteria versus new alternatives. *Structural Equation Modeling-a Multidisciplinary Journal*
- 5
- 6 1999;6(1):1-55. doi: 10.1080/10705519909540118
- 7
- 8
- 9 32. Browne MW, Cudeck R. Alternative ways of assessing model fit. In: Bollen KA, Long JS, eds.
- 10 Testing structural equation models. Newbury Park, CA: Sage Publications 1993.
- 11
- 12
- 13 33. Stata Statistical Software: Release 15 [program]. College Station, TX: StataCorp LLC, 2017.
- 14
- 15 34. IBM SPSS Statistics for Windows [program]. 24.0 version. Armonk, NY: IBM Corp., 2016.
- 16
- 17
- 18 35. Cohen J. A power primer. *Psychological Bulletin* 1992;112:155-59.
- 19
- 20 36. What role do person factors play in modifying the impact of treatment burden in chronic illness?
- 21 Quality of Life Research; 2017.
- 22
- 23
- 24 37. Capturing Social and Behavioral Domains and Measures in Electronic Health Records [Available
- 25 from: [http://www.nap.edu/catalog/18709/capturing-social-and-behavioral-domains-in-electronic-](http://www.nap.edu/catalog/18709/capturing-social-and-behavioral-domains-in-electronic-health-records-phase)
- 26 [health-records-phase](http://www.nap.edu/catalog/18709/capturing-social-and-behavioral-domains-in-electronic-health-records-phase) accessed June 21, 2016 2016.
- 27
- 28
- 29
- 30
- 31
- 32 38. Gitterman BA, Flanagan PJ, Cotton WH, et al. Poverty and child health in the United States.
- 33 *Pediatrics* 2016:peds. 2016-0339.
- 34
- 35
- 36 39. Garg A, Boynton-Jarrett R, Dworkin PH. Avoiding the unintended consequences of screening for
- 37 social determinants of health. *Jama* 2016;316(8):813-14.
- 38
- 39
- 40
- 41 40. Adler NE, Cutler DM, Jonathan J, et al. Addressing Social Determinants of Health and Health
- 42 Disparities: Discussion Paper, Vital Directions for Health and Health Care Series. National
- 43 Academy of Medicine, Washington, DC. [https://nam.](https://nam.edu/wp-content/uploads/2016/09/addressing-social-determinantsof-health-and-health-disparities.pdf) edu/wp-content/uploads/2016/09/addressing-
- 44
- 45
- 46
- 47
- 48
- 49
- 50
- 51
- 52
- 53
- 54
- 55
- 56
- 57
- 58
- 59
- 60

## Figure Legends

**Figure 1. Theoretical Model Being Tested.** It was hypothesized that Reserve-Building activities would mediate the relationship between SES and Resilience. Thus, the direct effect from SES to Resilience would be partially or fully attenuated through both variables' relationship with Reserve-Building (the mediator).

**Figure 2. The Full Mediation Model.** Reserve-building activities mediate the relationships between Resilience and both SES and Personal Finance. The relevant Reserve-Building activities are Active in the World, Outdoor, and Exercise. The Personal Finance to Resilience path is also mediated by the participant's number of comorbid conditions. As indicated in Table 4, there are significant total indirect effects from both General SES ( $b = 0.06, p < 0.01$ ) and Personal Finance ( $b = 0.13, p < 0.01$ ) to Resilience. This model supports the hypothesis that the relationship between General SES and Resilience is mediated by engaging in the three Reserve-Building activities. Bold values indicate significant paths ( $p < .05$ ).

**Figures 3a-3c. The Relationship Between Reserve-Building and Resilience.** Correlation coefficients between the reserve-building activity and resilience are displayed as bar charts, with the left axis showing units. The mean values by SES tertile are displayed as line graphs, with the right axis showing units. The relationship between Active in the World and resilience is similar across SES groups, but the mean level of these activities varied by SES group (Figure 3a). For Outdoor activities, the associations with resilience and the group means were not different from each other (Figure 3b). For Exercise, however, the medium and high SES groups showed a statistically significant difference in associations with resilience, and the group means were not different from each other (Figure 3c).

**Supplementary Figure 1. The Bifactor Model of SES.** SES was modeled as a bifactor model with the general factor comprised of respondent's education, father's education, mother's education, occupational complexity, income tertile, and endorsed difficulty paying bills.

Figure 1. Theoretical model being tested



Figure 1. Theoretical Model Being Tested. It was hypothesized that Reserve-Building activities would mediate the relationship between SES and Resilience. Thus, the direct effect from SES to Resilience would be partially or fully attenuated through both variables' relationship with Reserve-Building (the mediator).

338x190mm (300 x 300 DPI)

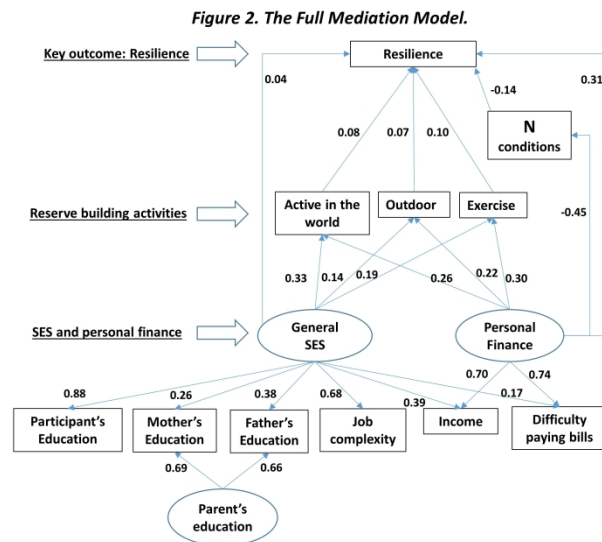

Figure 2. The Full Mediation Model. Reserve-building activities mediate the relationships between Resilience and both SES and Personal Finance. The relevant Reserve-Building activities are Active in the World, Outdoor, and Exercise. The Personal Finance to Resilience path is also mediated by the participant's number of comorbid conditions. As indicated in Table 4, there are significant total indirect effects from both General SES ( $b = 0.06$ ,  $p < 0.01$ ) and Personal Finance ( $b = 0.13$ ,  $p < 0.01$ ) to Resilience. This model supports the hypothesis that the relationship between General SES and Resilience is mediated by engaging in the three Reserve-Building activities. Bold values indicate significant paths ( $p < .05$ ).

338x190mm (300 x 300 DPI)

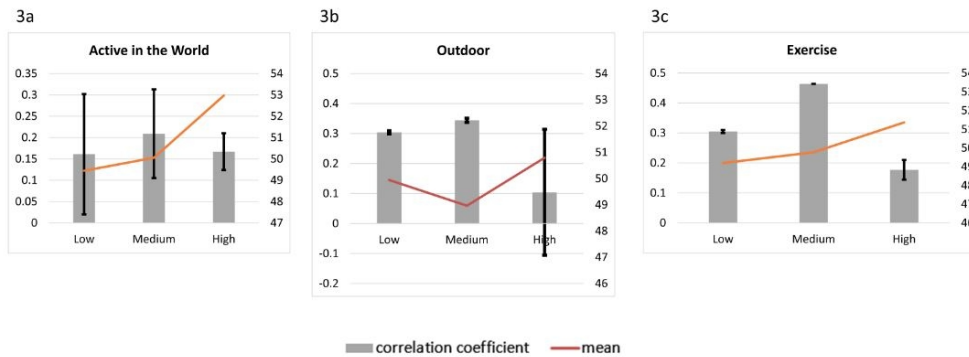

Figures 3a-3c. The Relationship Between Reserve-Building and Resilience. Correlation coefficients between the reserve-building activity and resilience are displayed as bar charts, with the left axis showing units. The mean values by SES tertile are displayed as line graphs, with the right axis showing units. The relationship between Active in the World and resilience is similar across SES groups, but the mean level of these activities varied by SES group (Figure 3a). For Outdoor activities, the associations with resilience and the group means were not different from each other (Figure 3b). For Exercise, however, the medium and high SES groups showed a statistically significant difference in associations with resilience, and the group means were not different from each other (Figure 3c).

92x52mm (300 x 300 DPI)

Supplementary Figure 1. The Bifactor Model of SES

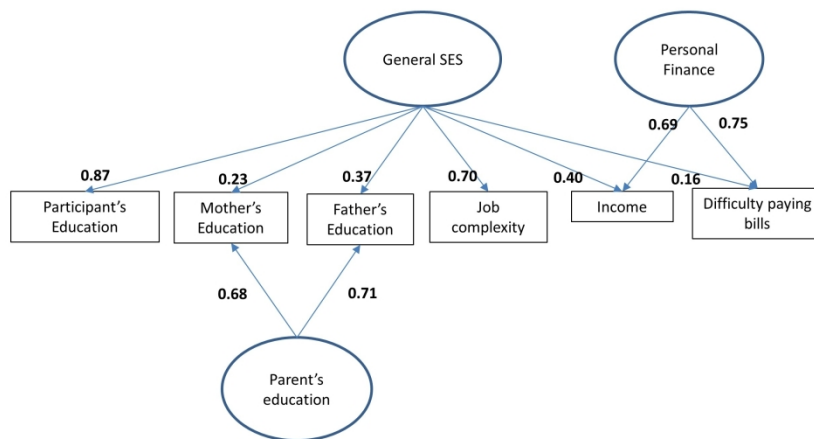

Supplementary Figure 1. The Bifactor Model of SES. SES was modeled as a bifactor model with the general factor comprised of respondent's education, father's education, mother's education, occupational complexity, income tertile, and endorsed difficulty paying bills.

254x190mm (300 x 300 DPI)

| <b>Supplementary Table 1. Results of Simple Mediation Models</b> |                       |
|------------------------------------------------------------------|-----------------------|
|                                                                  | <b>Direct Effects</b> |
| <b>Model</b>                                                     | <b>Estimate</b>       |
| SES -> Active in the world                                       | 0.41 ***              |
| SES -> Resilience                                                | 0.14 *                |
| Active in the world -> Resilience                                | 0.19 ***              |
| Indirect effect                                                  | 0.08 ***              |
| SES -> Games                                                     | 0.05                  |
| SES -> Resilience                                                | 0.20 ***              |
| Games -> Resilience                                              | -0.06                 |
| Indirect effect                                                  | 0.00                  |
| SES -> Outdoor                                                   | 0.20 ***              |
| SES -> Resilience                                                | 0.16 ***              |
| Outdoor -> Resilience                                            | 0.20 ***              |
| Indirect effect                                                  | 0.04 **               |
| SES -> Creative                                                  | 0.11                  |
| SES -> Resilience                                                | 0.19 ***              |
| Creative -> Resilience                                           | 0.05                  |
| Indirect effect                                                  | 0.01                  |
| SES -> Religious / Spiritual                                     | 0.04                  |
| SES -> Resilience                                                | 0.19 ***              |
| Religious / Spiritual -> Resilience                              | 0.07                  |
| Indirect effect                                                  | 0.00                  |
| SES -> Exercise                                                  | 0.29 ***              |
| SES -> Resilience                                                | 0.15 **               |
| Exercise -> Resilience                                           | 0.24 ***              |
| Indirect effect                                                  | 0.07 *                |
| SES -> Passive Media Consumption                                 | -0.17 ***             |
| SES -> Resilience                                                | 0.18 ***              |
| Passive Media Consumption -> Resilience                          | -0.06                 |
| Indirect effect                                                  | 0.01                  |
| SES -> Shopping / Cooking                                        | -0.06                 |
| SES -> Resilience                                                | 0.20 ***              |
| Shopping / Cooking -> Resilience                                 | 0.14 ***              |
| Indirect effect                                                  | -0.01                 |
| SES -> Inner life                                                | 0.23 ***              |
| SES -> Resilience                                                | 0.20 ***              |
| Inner life -> Resilience                                         | -0.01                 |
| Indirect effect                                                  | 0.00                  |

† p<0.10; \* p<0.05; \*\* p<0.01; \*\*\* p<0.001

| <b>Supplementary Table 2. Penultimate SEM Mediation Model Without Including Finance as a Predictor</b> |                                        |                      |           |                  |                  |
|--------------------------------------------------------------------------------------------------------|----------------------------------------|----------------------|-----------|------------------|------------------|
| <b>Model</b>                                                                                           |                                        | <b>beta</b>          | <b>se</b> | <b>t</b>         | <b>P value</b>   |
| Predicting reserve building                                                                            | SES -> Active in the world             | 0.40                 | 0.05      | 7.66             | <b>&lt;0.001</b> |
|                                                                                                        | SES -> Outdoor activities              | 0.20                 | 0.06      | 3.42             | <b>0.001</b>     |
|                                                                                                        | SES -> Exercise                        | 0.27                 | 0.05      | 4.93             | <b>&lt;0.001</b> |
| Predicting resilience: Direct effects                                                                  | SES -> Resilience                      | 0.05                 | 0.06      | 0.86             | 0.389            |
|                                                                                                        | Active in the world -> Resilience      | 0.12                 | 0.05      | 2.41             | 0.016            |
|                                                                                                        | Outdoor activities -> Resilience       | 0.10                 | 0.05      | 2.25             | 0.024            |
|                                                                                                        | Exercise -> Resilience                 | 0.13                 | 0.05      | 2.77             | 0.006            |
|                                                                                                        | Comorbid Conditions -> Resilience      | -0.31                | 0.04      | -7.11            | <b>&lt;0.001</b> |
| Predicting resilience: Total indirect effects                                                          | SES -> Resilience                      | 0.11                 | 0.03      | 3.79             | <b>&lt;0.001</b> |
|                                                                                                        | SES-> Active in the world-> Resilience | 0.05                 | 0.02      | 2.25             | <b>0.025</b>     |
| Predicting resilience: Specific Indirect effects                                                       | SES-> Outdoor activities-> Resilience  | 0.02                 | 0.01      | 1.87             | 0.061            |
|                                                                                                        | SES-> Exercise-> Resilience            | 0.035                | 0.015     | 2.308            | <b>0.021</b>     |
|                                                                                                        |                                        | <b>R<sup>2</sup></b> | <b>se</b> | <b>t</b>         | <b>P value</b>   |
| R square                                                                                               | Education                              | 0.60                 | 0.08      | 7.81             | <b>&lt;0.001</b> |
|                                                                                                        | Father Education                       | 0.58                 | 0.04      | 13.92            | <b>&lt;0.001</b> |
|                                                                                                        | Mother Education                       | 0.55                 | 0.04      | 13.17            | <b>&lt;0.001</b> |
|                                                                                                        | ONET                                   | 0.50                 | 0.07      | 7.05             | <b>&lt;0.001</b> |
|                                                                                                        | INCOME                                 | 0.59                 | 0.05      | 12.57            | <b>&lt;0.001</b> |
|                                                                                                        | Difficulty paying bills                | 0.51                 | 0.05      | 10.34            | <b>&lt;0.001</b> |
|                                                                                                        | Active in the world                    | 0.16                 | 0.04      | 3.83             | <b>&lt;0.001</b> |
|                                                                                                        | Outdoor activities                     | 0.04                 | 0.02      | 1.71             | <b>0.087</b>     |
|                                                                                                        | Exercise                               | 0.07                 | 0.03      | 2.46             | <b>0.014</b>     |
| Resilience                                                                                             | 0.19                                   | 0.04                 | 5.29      | <b>&lt;0.001</b> |                  |

**Model Fit Statistics:**  $\chi^2=229.1$ ,  $df=36$ ,  $p<.01$ ;  $RMSEA=.110$ ,  $CFI=0.796$ ,  $TLI=0.689$

Path coefficients are reflected by " -> "



**STROBE 2007 (v4) checklist of items to be included in reports of observational studies in epidemiology\***  
**Checklist for cohort, case-control, and cross-sectional studies (combined)**

| Section/Topic             | Item # | Recommendation                                                                                                                                                                                                                                                                                                                                                                                                                                                         | Reported on page #     |
|---------------------------|--------|------------------------------------------------------------------------------------------------------------------------------------------------------------------------------------------------------------------------------------------------------------------------------------------------------------------------------------------------------------------------------------------------------------------------------------------------------------------------|------------------------|
| Title and abstract        | 1      | (a) Indicate the study's design with a commonly used term in the title or the abstract                                                                                                                                                                                                                                                                                                                                                                                 | 1                      |
|                           |        | (b) Provide in the abstract an informative and balanced summary of what was done and what was found                                                                                                                                                                                                                                                                                                                                                                    | 3                      |
| <b>Introduction</b>       |        |                                                                                                                                                                                                                                                                                                                                                                                                                                                                        |                        |
| Background/rationale      | 2      | Explain the scientific background and rationale for the investigation being reported                                                                                                                                                                                                                                                                                                                                                                                   | 6                      |
| Objectives                | 3      | State specific objectives, including any pre-specified hypotheses                                                                                                                                                                                                                                                                                                                                                                                                      | 6                      |
| <b>Methods</b>            |        |                                                                                                                                                                                                                                                                                                                                                                                                                                                                        |                        |
| Study design              | 4      | Present key elements of study design early in the paper                                                                                                                                                                                                                                                                                                                                                                                                                | 7                      |
| Setting                   | 5      | Describe the setting, locations, and relevant dates, including periods of recruitment, exposure, follow-up, and data collection                                                                                                                                                                                                                                                                                                                                        | 7                      |
| Participants              | 6      | (a) <i>Cohort study</i> —Give the eligibility criteria, and the sources and methods of selection of participants. Describe methods of follow-up<br><i>Case-control study</i> —Give the eligibility criteria, and the sources and methods of case ascertainment and control selection. Give the rationale for the choice of cases and controls<br><i>Cross-sectional study</i> —Give the eligibility criteria, and the sources and methods of selection of participants | 7                      |
|                           |        | (b) <i>Cohort study</i> —For matched studies, give matching criteria and number of exposed and unexposed<br><i>Case-control study</i> —For matched studies, give matching criteria and the number of controls per case                                                                                                                                                                                                                                                 | NA                     |
| Variables                 | 7      | Clearly define all outcomes, exposures, predictors, potential confounders, and effect modifiers. Give diagnostic criteria, if applicable                                                                                                                                                                                                                                                                                                                               | 8                      |
| Data sources/ measurement | 8*     | For each variable of interest, give sources of data and details of methods of assessment (measurement). Describe comparability of assessment methods if there is more than one group                                                                                                                                                                                                                                                                                   | 8                      |
| Bias                      | 9      | Describe any efforts to address potential sources of bias                                                                                                                                                                                                                                                                                                                                                                                                              | 11-12                  |
| Study size                | 10     | Explain how the study size was arrived at                                                                                                                                                                                                                                                                                                                                                                                                                              | 7                      |
| Quantitative variables    | 11     | Explain how quantitative variables were handled in the analyses. If applicable, describe which groupings were chosen and why                                                                                                                                                                                                                                                                                                                                           | 9-10                   |
| Statistical methods       | 12     | (a) Describe all statistical methods, including those used to control for confounding                                                                                                                                                                                                                                                                                                                                                                                  | 9-10, Supp. Tables 1,2 |
|                           |        | (b) Describe any methods used to examine subgroups and interactions                                                                                                                                                                                                                                                                                                                                                                                                    | NA                     |
|                           |        | (c) Explain how missing data were addressed                                                                                                                                                                                                                                                                                                                                                                                                                            | NA                     |
|                           |        | (d) <i>Cohort study</i> —If applicable, explain how loss to follow-up was addressed<br><i>Case-control study</i> —If applicable, explain how matching of cases and controls was addressed                                                                                                                                                                                                                                                                              | NA                     |

|                          |     |                                                                                                                                                                                                              |                                       |
|--------------------------|-----|--------------------------------------------------------------------------------------------------------------------------------------------------------------------------------------------------------------|---------------------------------------|
|                          |     | <i>Cross-sectional study</i> —If applicable, describe analytical methods taking account of sampling strategy                                                                                                 |                                       |
|                          |     | (e) Describe any sensitivity analyses                                                                                                                                                                        | NA                                    |
| <b>Results</b>           |     |                                                                                                                                                                                                              |                                       |
| Participants             | 13* | (a) Report numbers of individuals at each stage of study—eg numbers potentially eligible, examined for eligibility, confirmed eligible, included in the study, completing follow-up, and analysed            | NA                                    |
|                          |     | (b) Give reasons for non-participation at each stage                                                                                                                                                         | NA                                    |
|                          |     | (c) Consider use of a flow diagram                                                                                                                                                                           | NA                                    |
| Descriptive data         | 14* | (a) Give characteristics of study participants (eg demographic, clinical, social) and information on exposures and potential confounders                                                                     | 10                                    |
|                          |     | (b) Indicate number of participants with missing data for each variable of interest                                                                                                                          | Tables 1,2                            |
|                          |     | (c) <i>Cohort study</i> —Summarise follow-up time (eg, average and total amount)                                                                                                                             | NA                                    |
| Outcome data             | 15* | <i>Cohort study</i> —Report numbers of outcome events or summary measures over time                                                                                                                          |                                       |
|                          |     | <i>Case-control study</i> —Report numbers in each exposure category, or summary measures of exposure                                                                                                         |                                       |
|                          |     | <i>Cross-sectional study</i> —Report numbers of outcome events or summary measures                                                                                                                           | Table 2                               |
| Main results             | 16  | (a) Give unadjusted estimates and, if applicable, confounder-adjusted estimates and their precision (eg, 95% confidence interval). Make clear which confounders were adjusted for and why they were included | 11-13, Tables 3, 4, Supp. Tables 1, 2 |
|                          |     | (b) Report category boundaries when continuous variables were categorized                                                                                                                                    | NA                                    |
|                          |     | (c) If relevant, consider translating estimates of relative risk into absolute risk for a meaningful time period                                                                                             | NA                                    |
| Other analyses           | 17  | Report other analyses done—eg analyses of subgroups and interactions, and sensitivity analyses                                                                                                               | Tables 3, 4, Supp. Tables 1, 2        |
| <b>Discussion</b>        |     |                                                                                                                                                                                                              |                                       |
| Key results              | 18  | Summarise key results with reference to study objectives                                                                                                                                                     | 14-16                                 |
| Limitations              | 19  | Discuss limitations of the study, taking into account sources of potential bias or imprecision. Discuss both direction and magnitude of any potential bias                                                   | 5, 15                                 |
| Interpretation           | 20  | Give a cautious overall interpretation of results considering objectives, limitations, multiplicity of analyses, results from similar studies, and other relevant evidence                                   | 14-16                                 |
| Generalisability         | 21  | Discuss the generalisability (external validity) of the study results                                                                                                                                        | 15                                    |
| <b>Other information</b> |     |                                                                                                                                                                                                              |                                       |
| Funding                  | 22  | Give the source of funding and the role of the funders for the present study and, if applicable, for the original study on which the present article is based                                                | 16                                    |

\*Give information separately for cases and controls in case-control studies and, if applicable, for exposed and unexposed groups in cohort and cross-sectional studies.

1  
2  
3  
4  
5  
6  
7  
8  
9  
10  
11  
12  
13  
14  
15  
16  
17  
18  
19  
20  
21  
22  
23  
24  
25  
26  
27  
28  
29  
30  
31  
32  
33  
34  
35  
36  
37  
38  
39  
40  
41  
42  
43  
44  
45  
46  
47

**Note:** An Explanation and Elaboration article discusses each checklist item and gives methodological background and published examples of transparent reporting. The STROBE checklist is best used in conjunction with this article (freely available on the Web sites of PLoS Medicine at <http://www.plosmedicine.org/>, Annals of Internal Medicine at <http://www.annals.org/>, and Epidemiology at <http://www.epidem.com/>). Information on the STROBE Initiative is available at [www.strobe-statement.org](http://www.strobe-statement.org).

For peer review only
